# Supplementary material for: The case for investing in the male condom
Source: PubMed Central journal article supplement (PMC5433691; doi:10.1371/journal.pone.0177108), 2017-05-16
Supplement: pone.0177108.s008.pdf [file pone.0177108.s008.pdf]

S8 Table. Calculation and assumptions on DALYs per STI episode

| Metric                    | Age group | Source                         | Chlamydia   | Gonorrhoea | Syphilis                             | Genital herpes & HSV-2                     |
|---------------------------|-----------|--------------------------------|-------------|------------|--------------------------------------|--------------------------------------------|
| Prevalent episodes        | 15-49y    | WHO 2012/2015 & [20] for HSV-2 | 126,719,000 | 28,565,000 | 17,695,000                           | 417,000,000                                |
| Incident episodes         | 15-49y    | WHO 2012/2015                  | 130,107,147 | 83,514,235 | 5,589,625                            | 21,300,000                                 |
| DALYs                     | All ages  | GBD 2013/2015                  | 692,400     | 313,900    | 11,324,500                           | 311,600                                    |
| DALY per incident episode |           | Avenir's derivation            | 0.0053      | 0.0038     | 2.0                                  | 0.0146                                     |
| Comments                  |           |                                |             |            | DALYs reflect tertiary syphilis only | DALYs do not account for congenital herpes |
