# Supplementary material for: The case for investing in the male condom
Source: PLoS One. 2017 May 16;12(5):e0177108. doi: 10.1371/journal.pone.0177108 (PMC5433691; doi:10.1371/journal.pone.0177108)
Supplement: S1 File — (XLSX) [file pone.0177108.s001.xlsx]

## Sheet: Acronyms List
ACRONYM LIST
FP	Family planning
IC	Incremental cost
ICER	Incremental cost-effectiveness ratio
MP	Multiple partner
MSM	Men who have sex with men
PR	Prisoner
SDC	Serodiscordant couple
SM	Social marketing
SW	Sex worker
TG	Transgender

## Sheet: Condom Gap_FP
A. Condom Gap for Family Planning
	# of Eligible usersa (thousands)	% users	Current Use	% users	Need	Gap
Countdown Countries
AFRICA
Sub-Saharan Africa
Eastern Africa
Burundi	2623.66		1.72721e+06		4.13383e+06	2.40663e+06
Comoros	193.06		561805		2.20227e+06	1.64047e+06
Djibouti	238.649		4925.72		13631.6	8705.92
Eritrea	1269.37		2.34733e+06		7.62005e+06	5.27273e+06
Ethiopia	24103.2		9.85144e+06		1.95525e+07	9.70104e+06
Kenya	11175.2		2.14979e+07		3.25492e+07	1.10513e+07
Madagascar	5867		9.05184e+06		1.70744e+07	8.02253e+06
Malawi	3960.66		7.80219e+06		1.15769e+07	3.77467e+06
Mozambique	6447.82		4.64367e+07		1.01125e+08	5.46878e+07
Rwanda	2982.26		7.24153e+06		1.36192e+07	6.37763e+06
Somalia	2395.87		6325.1		94876.5	88551.4
South Sudan	2934.74		2.56555e+06		2.80555e+07	2.549e+07
Uganda	8698.65		2.12317e+07		5.47702e+07	3.35385e+07
United Republic of Tanzania	12306.1		7.63926e+07		1.55693e+08	7.93003e+07
Zambia	3733.35		1.64103e+07		2.90413e+07	1.2631e+07
Zimbabwe	4001.24		1.16806e+07		1.50142e+07	3.33367e+06
Middle Africa
Angola	5569.84		4.30291e+06		1.46495e+07	1.03465e+07
Cameroon	5587.94		8.94309e+07		2.41963e+08	1.52532e+08
Central African Republic	1225.43		5.33486e+06		1.75398e+07	1.22049e+07
Chad	3090.83		607534		6.49594e+06	5.88841e+06
Congo	1073.5		2.283e+07		6.02534e+07	3.74234e+07
Democratic Republic of the Congo	17320.1		1.161e+08		6.1472e+08	4.9862e+08
Equatorial Guinea	194.31		11258		46793.4	35535.4
Gabon	418.579		1.59574e+06		3.90429e+06	2.30855e+06
Sao Tome and Principe	45.493		425591		938845	513254
Northern Africa
Egypt	23090		1.34412e+07		1.67079e+07	3.26677e+06
Morocco	9363.52		6.92367e+06		1.04833e+07	3.55963e+06
Sudan	9805.17		157667		514183	356516
Southern Africa
Botswana	627.997		1.38726e+07		1.96233e+07	5.75077e+06
Lesotho	554.745		8.6246e+06		1.2242e+07	3.61738e+06
Namibia	654.357		4.24147e+06		5.70639e+06	1.46492e+06
South Africa	14677.4		1.21212e+08		1.47202e+08	2.59896e+07
Swaziland	334.442		4.2074e+06		5.82556e+06	1.61816e+06
Western Africa
Benin	2611.76		4.31693e+06		1.45924e+07	1.02755e+07
Burkina Faso	4178.78		2.5193e+06		6.91605e+06	4.39674e+06
Côte d'Ivoire	5313.9		4.05212e+07		1.06539e+08	6.60177e+07
Gambia	468.907		546764		2.36701e+06	1.82024e+06
Ghana	6950.96		8.33281e+06		2.38724e+07	1.55396e+07
Guinea	2932.17		1.10604e+07		4.13872e+07	3.03268e+07
Guinea-Bissau	448.036		981306		2.45956e+06	1.47825e+06
Liberia	1059.78		1.30238e+06		3.30893e+06	2.00654e+06
Mali	3845.64		1.08539e+06		3.73104e+06	2.64564e+06
Mauritania	984.496		519696		2.54839e+06	2.02869e+06
Niger	4086.75		547298		1.39473e+06	847429
Nigeria	41362.6		2.41435e+08		7.08343e+08	4.66908e+08
Senegal	3652.98		4.36342e+06		1.23722e+07	8.0088e+06
Sierra Leone	1576.65		1.37017e+06		3.10057e+06	1.7304e+06
Togo	1784.86		1.25993e+07		3.75891e+07	2.49898e+07
ASIA
Central Asia
Kyrgyzstan	1554.7		1.29524e+07		2.26911e+07	9.73866e+06
Tajikistan	2220.34		4.72027e+06		1.038e+07	5.65974e+06
Turkmenistan	1506.98		1.16721e+06		1.93034e+06	763134
Uzbekistan	8298.12		1.62032e+07		2.10786e+07	4.87531e+06
Eastern Asia
China	362976		2.11244e+09		2.28645e+09	1.74011e+08
Democratic People's Republic of Korea	6695.15		1.02677e+06		1.44374e+06	416974
Southern Asia
Afghanistan	7383.13		1.16045e+07		3.16666e+07	2.0062e+07
Bangladesh	45002.3		2.71833e+08		4.0036e+08	1.28526e+08
India	336738		1.99586e+09		3.03452e+09	1.03866e+09
Nepal	7846.22		2.70996e+07		4.78098e+07	2.07103e+07
Pakistan	47707.3		3.57781e+08		9.31001e+08	5.7322e+08
South-Eastern Asia
Cambodia	4269.69		6.97223e+06		1.52448e+07	8.27261e+06
Indonesia	69509.4		2.99614e+07		3.85694e+07	8.60805e+06
Lao People's Democratic Republic	1811.57		1.76346e+06		3.15953e+06	1.39607e+06
Myanmar	14772		5.20092e+06		8.3119e+06	3.11098e+06
Philippines	26105.5		4.50978e+07		1.0683e+08	6.17322e+07
Viet Nam	25898.2		2.85248e+08		4.01315e+08	1.16067e+08
Western Asia
Azerbaijan	2685.7		1.03018e+06		4.45477e+06	3.42459e+06
Iraq	8841.35		1.43389e+07		3.04772e+07	1.61383e+07
Yemen	6638.24		2.65423e+06		7.04185e+06	4.38761e+06
LATIN AMERICA AND THE CARIBBEAN
Caribbean
Haiti	2852.83		2.1641e+07		5.51615e+07	3.35205e+07
Central America
Guatemala	4280.3		6.66288e+06		9.81712e+06	3.15424e+06
Mexico	34528.4		1.5073e+08		1.92363e+08	4.16329e+07
South America
Bolivia (Plurinational State of)	2747.53		1.41443e+07		3.3333e+07	1.91887e+07
Brazil	56748.6		4.87369e+08		5.8208e+08	9.47112e+07
Peru	8310.36		6.25184e+07		9.85388e+07	3.60204e+07
OCEANIA
Melanesia/Micronesia/Polynesia
Papua New Guinea	1916.9		3.19049e+06		8.74866e+06	5.55817e+06
Solomon Islands	144.495		61381.5		135247	73865.8
Fast-Track Countries
Iran (Islamic Republic of)	23474.9		7.05815e+07		1.10301e+08	3.97195e+07
Jamaica	754.663		1.03215e+07		1.33209e+07	2.99933e+06
Russian Federation	34636.4		5.18953e+08		8.03573e+08	2.8462e+08
Ukraine	10768.5		1.25726e+08		2.04766e+08	7.90398e+07
United States of America	73393.8		6.46417e+08		7.75285e+08	1.28868e+08
TOTAL	1.51084e+06		8.3029e+09		1.29336e+10	4.63073e+09
a: eligible users = # of women of reproductive age (14-49); Source: UN World Population Prospects

## Sheet: Condom Gap_HIV
B. Condom Gap for HIV STI
	# of Eligible usersa (thousands)	% users	Current Use	% users	Need	Gap
Countdown Countries
AFRICA
Sub-Saharan Africa
Eastern Africa
Burundi	2623.66		3.12115e+06		3.93659e+06	815436
Comoros	193.06		561805		2.20227e+06	1.64047e+06
Djibouti	238.649		4925.72		13631.6	8705.92
Eritrea	1269.37		2.34733e+06		7.62005e+06	5.27273e+06
Ethiopia	24103.2		9.85144e+06		1.95525e+07	9.70104e+06
Kenya	11175.2		2.11141e+07		3.11911e+07	1.0077e+07
Madagascar	5867		7.74928e+06		1.47005e+07	6.95125e+06
Malawi	3960.66		2.14717e+06		4.69694e+06	2.54977e+06
Mozambique	6447.82		2.5859e+07		4.35538e+07	1.76948e+07
Rwanda	2982.26		2.07091e+06		2.9137e+06	842791
Somalia	2395.87		1.10316e+06		3.79e+06	2.68684e+06
South Sudan	2934.74		599719		1.01009e+06	410374
Uganda	8698.65		1.43516e+07		3.16538e+07	1.73022e+07
United Republic of Tanzania	12306.1		1.33529e+07		1.83274e+07	4.97459e+06
Zambia	3733.35		1.45584e+07		2.15066e+07	6.94823e+06
Zimbabwe	4001.24		1.1485e+06		2.53313e+06	1.38463e+06
Middle Africa
Angola	5569.84		6.39135e+06		7.89404e+06	1.50269e+06
Cameroon	5587.94		5.65261e+06		7.60929e+06	1.95667e+06
Central African Republic	1225.43		1.31599e+06		1.85155e+06	535563
Chad	3090.83		173845		275226	101382
Congo	1073.5		1.11836e+06		1.69446e+06	576093
Democratic Republic of the Congo	17320.1		1.31305e+07		3.06378e+07	1.75073e+07
Equatorial Guinea	194.31		508230		641011	132781
Gabon	418.579		312234		642835	330601
Sao Tome and Principe	45.493		51139.7		69924.3	18784.7
Northern Africa
Egypt	23090		3.61404e+06		5.47571e+06	1.86167e+06
Morocco	9363.52		8.82885e+06		1.4892e+07	6.06319e+06
Sudan	9805.17		3.01254e+06		1.17154e+07	8.7029e+06
Southern Africa
Botswana	627.997		598282		841762	243481
Lesotho	554.745		1.77084e+06		2.49151e+06	720671
Namibia	654.357		599702		1.01006e+06	410363
South Africa	14677.4		6.33072e+06		9.5918e+06	3.26108e+06
Swaziland	334.442		1.30861e+06		1.3672e+06	58594.3
Western Africa
Benin	2611.76		1.92363e+06		2.99231e+06	1.06868e+06
Burkina Faso	4178.78		3.35937e+06		7.23557e+06	3.8762e+06
Côte d'Ivoire	5313.9		2.84792e+06		7.81782e+06	4.9699e+06
Gambia	468.907		432610		728635	296025
Ghana	6950.96		7.71426e+06		1.19601e+07	4.24584e+06
Guinea	2932.17		981538		1.1172e+06	135660
Guinea-Bissau	448.036		517628		728285	210657
Liberia	1059.78		280281		424660	144379
Mali	3845.64		3.49868e+06		5.44239e+06	1.94371e+06
Mauritania	984.496		28964.2		48783.8	19819.6
Niger	4086.75		3.85938e+06		6.50026e+06	2.64088e+06
Nigeria	41362.6		2.02444e+07		5.45042e+07	3.42598e+07
Senegal	3652.98		3.87462e+06		4.61656e+06	741948
Sierra Leone	1576.65		1.84873e+06		2.41889e+06	570168
Togo	1784.86		1.56421e+06		1.85584e+06	291632
ASIA
Central Asia
Kyrgyzstan	1554.7		1.06886e+06		1.57515e+06	506300
Tajikistan	2220.34		1.75374e+06		2.88852e+06	1.13478e+06
Turkmenistan	1506.98		1.20894e+06		2.03618e+06	827247
Uzbekistan	8298.12		7.8522e+06		1.11821e+07	3.32986e+06
Eastern Asia
China	362976		1.81928e+08		2.12249e+08	3.03213e+07
Democratic People's Republic of Korea	6695.15		6.09559e+06		9.00481e+06	2.90922e+06
Southern Asia
Afghanistan	7383.13		2.44339e+06		9.77358e+06	7.33018e+06
Bangladesh	45002.3		4.63381e+06		1.58228e+07	1.1189e+07
India	336738		4.51263e+08		5.74335e+08	1.23072e+08
Nepal	7846.22		3.34003e+06		6.23472e+06	2.89469e+06
Pakistan	47707.3		8.97456e+06		3.1411e+07	2.24364e+07
South-Eastern Asia
Cambodia	4269.69		3.8437e+06		5.67818e+06	1.83447e+06
Indonesia	69509.4		2.0177e+07		4.8703e+07	2.85261e+07
Lao People's Democratic Republic	1811.57		1.59888e+06		2.51453e+06	915650
Myanmar	14772		1.24401e+07		1.58084e+07	3.36832e+06
Philippines	26105.5		2.2441e+07		3.53004e+07	1.28594e+07
Viet Nam	25898.2		9.84508e+06		1.62154e+07	6.37034e+06
Western Asia
Azerbaijan	2685.7		2.71224e+06		5.63958e+06	2.92734e+06
Iraq	8841.35		1.59032e+07		2.23752e+07	6.47206e+06
Yemen	6638.24		3.81428e+06		7.8276e+06	4.01332e+06
LATIN AMERICA AND THE CARIBBEAN
Caribbean
Haiti	2852.83		3.30147e+07		4.02759e+07	7.26117e+06
Central America
Guatemala	4280.3		4.63678e+06		5.11141e+06	474631
Mexico	34528.4		2.86844e+07		5.42679e+07	2.55834e+07
South America
Bolivia (Plurinational State of)	2747.53		4.01068e+06		5.64289e+06	1.63221e+06
Brazil	56748.6		1.83084e+08		3.17186e+08	1.34102e+08
Peru	8310.36		6.60563e+06		8.11218e+06	1.50655e+06
OCEANIA
Melanesia/Micronesia/Polynesia
Papua New Guinea	1916.9		749312		1.6139e+06	864590
Solomon Islands	144.495
Fast-Track Countries
Iran (Islamic Republic of)	23474.9		1.74735e+07		3.12546e+07	1.3781e+07
Jamaica	754.663		2.912e+06		3.38043e+06	468431
Russian Federation	34636.4		3.88824e+07		5.47062e+07	1.58238e+07
Ukraine	10768.5		1.88278e+07		2.76996e+07	8.8718e+06
United States of America	73393.8		8.09157e+07		1.15229e+08	3.43137e+07
TOTAL	1.51084e+06		1.41077e+09		2.11735e+09	7.06581e+08
a: eligible users = # of women of reproductive age (14-49); Source: UN World Population Prospects

## Sheet: Condom Gap_TOT
C. Total Condom Gap
	# of Eligible usersa (thousands)	% users	Current Use	% users	Need	Gap
Countdown Countries
AFRICA
Sub-Saharan Africa
Eastern Africa
Burundi	2623.66		4.84836e+06		8.07042e+06	3.22206e+06
Comoros	193.06		1.12361e+06		4.40455e+06	3.28094e+06
Djibouti	238.649		9851.43		27263.3	17411.8
Eritrea	1269.37		4.69465e+06		1.52401e+07	1.05455e+07
Ethiopia	24103.2		1.97029e+07		3.9105e+07	1.94021e+07
Kenya	11175.2		4.26119e+07		6.37403e+07	2.11284e+07
Madagascar	5867		1.68011e+07		3.17749e+07	1.49738e+07
Malawi	3960.66		9.94936e+06		1.62738e+07	6.32444e+06
Mozambique	6447.82		7.22957e+07		1.44678e+08	7.23826e+07
Rwanda	2982.26		9.31244e+06		1.65329e+07	7.22042e+06
Somalia	2395.87		1.10948e+06		3.88487e+06	2.77539e+06
South Sudan	2934.74		3.16527e+06		2.90656e+07	2.59003e+07
Uganda	8698.65		3.55833e+07		8.6424e+07	5.08407e+07
United Republic of Tanzania	12306.1		8.97455e+07		1.7402e+08	8.42749e+07
Zambia	3733.35		3.09687e+07		5.05479e+07	1.95792e+07
Zimbabwe	4001.24		1.28291e+07		1.75474e+07	4.71829e+06
Middle Africa
Angola	5569.84		1.06943e+07		2.25435e+07	1.18492e+07
Cameroon	5587.94		9.50835e+07		2.49572e+08	1.54489e+08
Central African Republic	1225.43		6.65085e+06		1.93914e+07	1.27405e+07
Chad	3090.83		781379		6.77117e+06	5.98979e+06
Congo	1073.5		2.39484e+07		6.19479e+07	3.79995e+07
Democratic Republic of the Congo	17320.1		1.29231e+08		6.45358e+08	5.16127e+08
Equatorial Guinea	194.31		519488		687805	168316
Gabon	418.579		1.90798e+06		4.54713e+06	2.63915e+06
Sao Tome and Principe	45.493		476730		1.00877e+06	532039
Northern Africa
Egypt	23090		1.70552e+07		2.21836e+07	5.12844e+06
Morocco	9363.52		1.57525e+07		2.53753e+07	9.62282e+06
Sudan	9805.17		3.17021e+06		1.22296e+07	9.05942e+06
Southern Africa
Botswana	627.997		1.44708e+07		2.04651e+07	5.99425e+06
Lesotho	554.745		1.03954e+07		1.47335e+07	4.33805e+06
Namibia	654.357		4.84117e+06		6.71645e+06	1.87528e+06
South Africa	14677.4		1.27543e+08		1.56794e+08	2.92507e+07
Swaziland	334.442		5.516e+06		7.19276e+06	1.67676e+06
Western Africa
Benin	2611.76		6.24056e+06		1.75847e+07	1.13442e+07
Burkina Faso	4178.78		5.87867e+06		1.41516e+07	8.27294e+06
Côte d'Ivoire	5313.9		4.33692e+07		1.14357e+08	7.09876e+07
Gambia	468.907		979374		3.09564e+06	2.11627e+06
Ghana	6950.96		1.60471e+07		3.58325e+07	1.97854e+07
Guinea	2932.17		1.20419e+07		4.25044e+07	3.04625e+07
Guinea-Bissau	448.036		1.49893e+06		3.18784e+06	1.68891e+06
Liberia	1059.78		1.58266e+06		3.73359e+06	2.15092e+06
Mali	3845.64		4.58407e+06		9.17343e+06	4.58936e+06
Mauritania	984.496		548660		2.59717e+06	2.04851e+06
Niger	4086.75		4.40668e+06		7.89499e+06	3.48831e+06
Nigeria	41362.6		2.6168e+08		7.62847e+08	5.01167e+08
Senegal	3652.98		8.23803e+06		1.69888e+07	8.75075e+06
Sierra Leone	1576.65		3.2189e+06		5.51947e+06	2.30057e+06
Togo	1784.86		1.41635e+07		3.9445e+07	2.52814e+07
ASIA
Central Asia
Kyrgyzstan	1554.7		1.40213e+07		2.42662e+07	1.0245e+07
Tajikistan	2220.34		6.47401e+06		1.32685e+07	6.79451e+06
Turkmenistan	1506.98		2.37614e+06		3.96652e+06	1.59038e+06
Uzbekistan	8298.12		2.40554e+07		3.22606e+07	8.20517e+06
Eastern Asia
China	362976		2.29437e+09		2.4987e+09	2.04332e+08
Democratic People's Republic of Korea	6695.15		7.12236e+06		1.04485e+07	3.32619e+06
Southern Asia
Afghanistan	7383.13		1.40479e+07		4.14401e+07	2.73922e+07
Bangladesh	45002.3		2.76467e+08		4.16183e+08	1.39715e+08
India	336738		2.44712e+09		3.60886e+09	1.16173e+09
Nepal	7846.22		3.04396e+07		5.40446e+07	2.36049e+07
Pakistan	47707.3		3.66756e+08		9.62412e+08	5.95656e+08
South-Eastern Asia
Cambodia	4269.69		1.08159e+07		2.0923e+07	1.01071e+07
Indonesia	69509.4		5.01383e+07		8.72724e+07	3.71341e+07
Lao People's Democratic Republic	1811.57		3.36234e+06		5.67406e+06	2.31172e+06
Myanmar	14772		1.7641e+07		2.41203e+07	6.4793e+06
Philippines	26105.5		6.75388e+07		1.4213e+08	7.45916e+07
Viet Nam	25898.2		2.95094e+08		4.17531e+08	1.22437e+08
Western Asia
Azerbaijan	2685.7		3.74242e+06		1.00944e+07	6.35193e+06
Iraq	8841.35		3.02421e+07		5.28524e+07	2.26104e+07
Yemen	6638.24		6.46851e+06		1.48694e+07	8.40093e+06
LATIN AMERICA AND THE CARIBBEAN
Caribbean
Haiti	2852.83		5.46557e+07		9.54374e+07	4.07817e+07
Central America
Guatemala	4280.3		1.12997e+07		1.49285e+07	3.62887e+06
Mexico	34528.4		1.79415e+08		2.46631e+08	6.72163e+07
South America
Bolivia (Plurinational State of)	2747.53		1.8155e+07		3.89759e+07	2.0821e+07
Brazil	56748.6		6.70453e+08		8.99266e+08	2.28813e+08
Peru	8310.36		6.9124e+07		1.06651e+08	3.7527e+07
OCEANIA
Melanesia/Micronesia/Polynesia
Papua New Guinea	1916.9		3.9398e+06		1.03626e+07	6.42276e+06
Solomon Islands	144.495		61381.5		135247	73865.8
Fast-Track Countries
Iran (Islamic Republic of)	23474.9		8.80551e+07		1.41556e+08	5.35005e+07
Jamaica	754.663		1.32335e+07		1.67013e+07	3.46776e+06
Russian Federation	34636.4		5.57835e+08		8.58279e+08	3.00444e+08
Ukraine	10768.5		1.44554e+08		2.32466e+08	8.79116e+07
United States of America	73393.8		7.27333e+08		8.90514e+08	1.63181e+08
TOTAL	1.51084e+06		9.71367e+09		1.5051e+10	5.33731e+09
a: eligible users = # of women of reproductive age (14-49); Source: UN World Population Prospects

## Sheet: Condom Use Rates
D. Condom Use Rates, by Risk Group
		Risk Group
		MSM		SW		Multiple Partner
Condom Case Country	Proxy Country	Year	% Use	Year	% Use	Year	% Use
Afghanistan	India	2012	0.174	2012	0.515	proxy	0.227
Angola	Zambia	2013	0.33	2011	0.7403	proxy	0.29
Azerbaijan		2011	0.285	2011	0.53	Source: 2006 DHS	0.26
Bangladesh	Cambodia	2014	0.496	2014	0.668	proxy	0.395
Benin		2013	0.823	2012	0.852	Source: 2011-12 DHS	0.22
Bolivia (Plurinational State of)		2011	0.6874	2011	0.9568	Source: 2008 DHS	0.352
Botswana	Namibia	2013	0.842	proxy	0.712	proxy	0.722
Brazil	Guyana	2011	0.5973	2009	0.9	proxy	0.654
Burkina Faso		2014	0.763	2014	0.877	Source: 2010 DHS	0.265
Burundi		2014	0.449	2014	0.525	Source: 2010 DHS	0.143
Cambodia		2013	0.87	2013	0.8057	Source: 2010 DHS	0.395
Cameroon		2014	0.779	2009	0.73	Source: 2011 DHS	0.43
Central African Republic	Cameroon	2013	0.48	2013	0.916	proxy	0.43
Chad	Sudan	proxy	0.199	2011	0.38	Source: 2004 DHS	0.202
China	India	2014	0.775	2014	0.887	proxy	0.227
Comoros		2014	0.538	2014	0.591	Source: 2012 DHS	0.368
Congo		2013	0.523	2013	0.8315	Source: 2011-12 DHS	0.344
Côte d'Ivoire		2013	0.7026	2014	0.768	Source: 2011-12 DHS	0.357
Democratic People's Republic of Korea	Cambodia	proxy	0.87	proxy	0.8057	proxy	0.395
Democratic Republic of the Congo		2014	0.636	2013	0.69	Source: 2013-14 DHS	0.126
Djibouti	Ethiopia	proxy	0.723	2014	0.664	proxy	0.155
Egypt	India	2014	0.2029	2014	0.25	proxy	0.227
Equatorial Guinea	Democratic Republic of the Congo	proxy	0.636	proxy	0.69	proxy	0.126
Eritrea	Ethiopia	proxy	0.723	2014	0.945	proxy	0.155
Ethiopia	Kenya	proxy	0.723	2013	0.984	Source: 2011 DHS	0.155
Gabon	Congo	proxy	0.523	2012	0.556	Source: 2012 DHS	0.511
Gambia		2011	0.455	2013	0.973	Source: 2013 DHS	0.188
Ghana		2012	0.6	2011	0.92	Source: 2008 DHS	0.262
Guatemala	Belize	2012	0.633	2012	0.977	proxy	0.655
Guinea		2012	0.252	2012	0.772	Source: 2012 DHS	0.254
Guinea-Bissau	Guinea	proxy	0.252	2011	0.9306	Source: 2014 MICS	0.442
Haiti		2011	0.7268	2011	0.8994	Source: 2012 DHS	0.467
India		2009	0.58	2009	0.83	Source: 2005-06 DHS	0.227
Indonesia	Timor-Leste	2011	0.5984	2011	0.5987	proxy	0.191
Iran (Islamic Republic of)	India	2009	0.38	2013	0.6089	proxy	0.227
Iraq	India	proxy	0.58	proxy	0.83	proxy	0.227
Jamaica	Belize	2013	0.733	2013	0.852	proxy	0.655
Kenya		2014	0.723	2013	0.862	Source: 2008-09 DHS	0.37
Kyrgyzstan		2013	0.816	2013	0.906	Source: 2012 DHS	0.664
Lao People's Democratic Republic	Cambodia	2014	0.444	2014	0.927	proxy	0.395
Lesotho		2014	0.622	2014	0.649	Source: 2009 DHS	0.523
Liberia		2013	0.195	2013	0.817	Source: 2013 DHS	0.236
Madagascar		2014	0.596	2013	0.664	Source: 2008-09 DHS	0.074
Malawi	Zimbabwe	proxy	0.35	2009	0.92	Source: 2010 DHS	0.245
Mali		2009	0.54	2014	0.988	Source: 2012-13 DHS	0.101
Mauritania	Benin	proxy	0.823	2009	0.88	proxy	0.22
Mexico	Belize	2013	0.731	2013	0.853	proxy	0.655
Morocco	India	2013	0.3994	2011	0.5025	proxy	0.227
Mozambique	Zimbabwe	proxy	0.35	proxy	0.712	Source: 2011 DHS	0.255
Myanmar	India	2013	0.815	2013	0.958	proxy	0.227
Namibia	Zimbabwe	proxy	0.35	proxy	0.712	Source: 2013 DHS	0.722
Nepal		2013	0.914	2011	0.8263	Source: 2011 DHS	0.265
Niger	Mali	proxy	0.54	2012	0.948	Source: 2012 DHS	0.043
Nigeria		2013	0.51	2011	0.9287	Source: 2013 DHS	0.198
Pakistan	India	2007	0.24	2014	0.415	proxy	0.227
Papua New Guinea	Timor-Leste	2011	0.6309	2011	0.8039	proxy	0.191
Peru		2011	0.4978	2013	0.953	Source: Eline	0.322
Philippines		2013	0.407	2014	0.729	Source: 2003 DHS	0.22
Russian Federation	Armenia	2009	0.56	2009	0.71	proxy	0.723
Rwanda		2009	0.5	2012	0.8	Source: 2010 DHS	0.275
Sao Tome and Principe	Gabon	proxy	0.523	2012	0.222	Source: 2008-09 DHS	0.329
Senegal		2014	0.726	2011	0.9374	Source: 2010-11 DHS	0.207
Sierra Leone		2013	0.322	2014	0.149	Source: 2013 DHS	0.126
Solomon Islands	Timor-Leste	proxy	0.66	proxy	0.3609	proxy	0.191
Somalia	Ethiopia	proxy	0.723	2014	0.337	proxy	0.155
South Africa	Namibia	2009	0.35	proxy	0.712	proxy	0.722
South Sudan	Uganda	proxy	0.39	proxy	0.862	proxy	0.19
Sudan	Uganda	2013	0.199	2013	0.225	proxy	0.19
Swaziland	South Africa	proxy	0.35	2009	0.87	Source: 2006-07 DHS	0.558
Tajikistan	Armenia	2011	0.6781	2014	0.714	proxy	0.723
Togo		2013	0.4701	2011	0.9123	Source: 2013-14 DHS	0.286
Turkmenistan	Armenia	proxy	0.653	proxy	0.939	proxy	0.723
Uganda	Kenya	2013	0.39	proxy	0.862	Source: 2011 DHS	0.19
Ukraine		2013	0.715	2013	0.967	Source: 2007 DHS	0.464
United Republic of Tanzania		2014	0.139	2014	0.7	Source: 2010 DHS	0.236
United States of America	Belize	2012	0.478	proxy	0.565	proxy	0.655
Uzbekistan	Armenia	2013	0.797	2013	0.807	proxy	0.723
Viet Nam	Cambodia	2013	0.664	2014	0.828	proxy	0.395
Yemen	India	2011	0.1992	2011	0.3488	proxy	0.227
Zambia	Zimbabwe	proxy	0.35	2011	0.8	Source: 2013-14 DHS	0.29
Zimbabwe	South Africa	proxy	0.35	2014	0.712	Source: 2010-11 DHS	0.331

## Sheet: Pop of Risk Groups
E. Populations of Risk Groups, 2015
Country	SW	MSM	Transgenders	Prisoners	SDC	MP	Subregion	Region
Afghanistan	44997.8	63904.8	54.6644	9124.21	3133.26	158970	Southern Asia	ASIA
Angola	36006.4	6800.15	1115.42	36298.4	121627	873294	Middle Africa	AFRICA
Azerbaijan	25923.8	54640.1	340.008	17376.2	3782.79	173105	Western Asia	ASIA
Bangladesh	71671.9	3012.74	3441.03	55242.9	4397.39	889411	Southern Asia	ASIA
Benin	13631.1	89959.1	73.65	17551.5	28263	552730	Western Africa	AFRICA
Bolivia (Plurinational State of)	25677.3	781	4497.96	8820.32	7676.28	337491	South America	LATIN AMERICA AND THE CARIBBEAN
Botswana	4000	27968	1299	6439.96	52627.2	101855	Southern Africa	AFRICA
Brazil	546848	34060	166187	190650	51119	6.84331e+06	South America	LATIN AMERICA AND THE CARIBBEAN
Burkina Faso	47873	59737	1703	27192.4	37285.9	693878	Western Africa	AFRICA
Burundi	17945.2	26193	545.171	17045.7	26867.4	78029.9	Eastern Africa	AFRICA
Cambodia	25974.2	5243.94	2986.85	4928.51	34753	112200	South-Eastern Asia	ASIA
Cameroon	34627.1	13423.7	1309.65	37676	144299	1.63013e+06	Middle Africa	AFRICA
Central African Republic	8421.43	3800000	262.197	8254.2	40046.8	193160	Middle Africa	AFRICA
Chad	1261.04	413158	671.183	20596.6	65104.1	539107	Middle Africa	AFRICA
China	4500000	69.7157	230762	1.42997e+06	367547	7.76779e+06	Eastern Asia	ASIA
Comoros	211.26	44982.2	3.48579	1332.67	0	24479.3	Eastern Africa	AFRICA
Congo	7690.3	78585	244.097	7446.72	31719.2	369823	Middle Africa	AFRICA
Côte d'Ivoire	9211	99231.6	3929.25	37786.3	142837	1.55687e+06	Western Africa	AFRICA
Democratic People's Republic of Korea	41009.2	1081.1	4961.58	23554.2	0	137277	Eastern Asia	ASIA
Democratic Republic of the Congo	2878785	87847.6	71314.8	116406	145228	3.80814e+06	Middle Africa	AFRICA
Djibouti	2967.84	135273	54.0549	1685.68	3510.9	38563.9	Eastern Africa	AFRICA
Egypt	24897.8	2913.69	2489.78	57042.5	4468.99	574690	Northern Africa	AFRICA
Equatorial Guinea	2914	60755	145.684	1501.05	9599.63	20530.9	Middle Africa	AFRICA
Eritrea	11271.6	3308.23	353.183	8334.84	5430.25	203092	Eastern Africa	AFRICA
Ethiopia	11632	1918.73	47018	162428	254743	843262	Eastern Africa	AFRICA
Gabon	2932.59	16456	95.9365	3099.26	14327.7	127611	Middle Africa	AFRICA
Gambia	3311.53	32255.1	8.01177	2944.26	7644.87	36177.3	Western Africa	AFRICA
Ghana	54776.6	651.513	1612.75	46299.8	89841.3	962592	Western Africa	AFRICA
Guatemala	23169.9	7434.65	5788.6	6052.55	21100.3	488711	Central America	LATIN AMERICA AND THE CARIBBEAN
Guinea	5097.32	6840.22	32.5757	20428.8	46925.4	547547	Western Africa	AFRICA
Guinea-Bissau	3310.15	30853	371.733	3044.52	13161	71052.3	Western Africa	AFRICA
Haiti	70302	313000	5856	12401.1	52763.5	715082	Caribbean	LATIN AMERICA AND THE CARIBBEAN
India	868000	339716	70000	270320	860503	4.74838e+06	Southern Asia	ASIA
Indonesia	229856	153710	37998	16998.1	314514	1.39448e+06	South-Eastern Asia	ASIA
Iran (Islamic Republic of)	141424	39231.1	16985.8	29326.1	34051.1	464478	Western Asia	ASIA
Iraq	101888	35661.1	7685.51	25698.6	0	221147	Western Asia	ASIA
Jamaica	15385.7	32488.6	1961.55	2794.85	11652	180640	Caribbean	LATIN AMERICA AND THE CARIBBEAN
Kenya	133675	26621.2	23556	75090.6	500886	1.43599e+06	Eastern Africa	AFRICA
Kyrgyzstan	7187.39	25356.4	1386.14	11238	4150.65	149691	Central Asia	ASIA
Lao People's Democratic Republic	11415.7	6763.42	1331.06	2109.15	5059.66	35427.8	South-Eastern Asia	ASIA
Lesotho	11445.8	9338.58	338.171	3774.43	47781.7	127139	Southern Africa	AFRICA
Liberia	1934.95	52379	37.7538	7324.46	10927	190113	Western Africa	AFRICA
Madagascar	66802.5	119694	2618.95	39451.7	13501	904523	Eastern Africa	AFRICA
Malawi	9338	1459.94	2030.6	26415.4	262690	368402	Eastern Africa	AFRICA
Mali	24822.8	9179.25	807.568	26082	47213.9	452886	Western Africa	AFRICA
Mauritania	222.319	911852	8.4693	6888.94	5538.46	161396	Western Africa	AFRICA
Mexico	237798	2112.66	94217	155316	84014.4	4.17451e+06	Central America	LATIN AMERICA AND THE CARIBBEAN
Morocco	68316.8	213284	2277.23	44701.1	8234.17	215387	Northern Africa	AFRICA
Mozambique	201202	1666	4354.42	41209.4	433000	1.79869e+06	Eastern Africa	AFRICA
Myanmar	72125	269689	24527.6	25359	82404	283403	South-Eastern Asia	ASIA
Namibia	2994	42636.1	83.3	4197	54828.7	64937.8	Southern Africa	AFRICA
Nepal	28249	11022.4	13484.4	5343.69	15771.6	261206	Southern Asia	ASIA
Niger	29671.4	740176	551.121	27664.4	16082.1	507965	Western Africa	AFRICA
Nigeria	236146	38355.3	944.95	291975	1.11539e+06	5.52631e+06	Western Africa	AFRICA
Pakistan	142818	28225	37008.8	60711	47390.9	986224	Southern Asia	ASIA
Papua New Guinea	15117.4	450952	1411.25	3330.5	10746.4	40321.4	Melanesia	OCEANIA
Peru	36827.9	22328.1	22547.6	22968.1	29615.1	1.02533e+06	South America	LATIN AMERICA AND THE CARIBBEAN
Philippines	159609	92219.2	19175.7	33130.6	18298.3	1.61587e+06	South-Eastern Asia	ASIA
Russian Federation	248665	644.114	24537.5	687282	438174	3.43048e+06	Central Asia	ASIA
Rwanda	13038.2	4493.65	645.79	17934.7	78332.5	105547	Eastern Africa	AFRICA
Sao Tome and Principe	317.838	55172.1	32.2057	0	482.292	4602.2	Middle Africa	AFRICA
Senegal	21076.5	6928.53	224.683	23017.8	16550.4	288418	Western Africa	AFRICA
Solomon Islands	11271.6	19961.7	353.183	269.621	0	25446.9	Melanesia	OCEANIA
Sierra Leone	11075.7	10664.2	346.427	10318.7	20355.3	388292	Western Africa	AFRICA
Somalia	17075.2	7136	533.208	15991.5	14524.4	378373	Eastern Africa	AFRICA
South Africa	44524.8	31303.1	998.084	150473	1.21194e+06	2.4369e+06	Southern Africa	AFRICA
South Sudan	39300	53819.7	356.8	8476.14	64111.4	470231	Eastern Africa	AFRICA
Sudan	53314.2	2872.15	2690.98	28472.3	22589.9	239170	Northern Africa	AFRICA
Swaziland	6266.89	32439.3	143.608	7003.22	22848	46165.3	Southern Africa	AFRICA
Tajikistan	13160.6	99000	1621.97	14187.7	7965.98	236587	Central Asia	ASIA
Togo	8491	348080	39.8546	11638.4	39591.6	292073	Western Africa	AFRICA
Turkmenistan	9255.37	183054	1080.1	9592.04	0	156898	Central Asia	ASIA
Uganda	38160	49000	1139.4	56704.4	467349	1.63019e+06	Eastern Africa	AFRICA
Ukraine	126442	1.08498e+06	9152.71	296644	119690	1.4487e+06	Central Asia	ASIA
United Republic of Tanzania	155450	120222	2450	81436.8	477891	2.49195e+06	Eastern Africa	AFRICA
United States of America	523770	382506	54249.1	2.91881e+06	563405	7.57832e+06	Northern America	NORTH AMERICA
Uzbekistan	50647.3	36510.1	6011.09	53021	12600.6	854690	Central Asia	ASIA
Viet Nam	71936	9225	15275	33841.9	129386	518753	South-Eastern Asia	ASIA
Yemen	35612.7	5025.75	1825.5	19202.9	3099.9	165814	Western Asia	ASIA
Zambia	15471	1.81728e+07	461.25	10325	278631	591882	Eastern Africa	AFRICA
Zimbabwe	11184.9	0	251.288	14479.7	309212	408584	Eastern Africa	AFRICA
Total	1.29381e+07	2.99143e+07	1.07128e+06	8.12749e+06	1.01648e+07	8.29929e+07

## Sheet: Total HIV-STI Condom Req
F. HIV-STI Condoms Required -- By risk group, all countries and fast-track countries
Condoms use versus required, millions - ALL COUNTRIES					Total HIV/STI condoms required, 2015-30				Condoms use versus required, millions - FAST TRACK COUNTRIES
					Scenario
Risk group		Current use, 2015	Required, 2016	Gap	Low	Medium	High		Risk group		Current use, 2015	Required, 2016	Gap
SW		2.4635e+09	2.86937e+09	4.05863e+08	2.4635e+09	2.86937e+09	5.09474e+10		SW		2.21453e+09	2.55109e+09	3.36566e+08
MSM		1.08993e+09	1.59913e+09	5.09201e+08	1.08993e+09	1.59913e+09	2.74179e+10		MSM		8.66249e+08	1.27218e+09	4.0593e+08
Transgender		9.54651e+07	1.08408e+08	1.29432e+07	9.54651e+07	1.08408e+08	1.8915e+09		Transgender		7.649e+07	8.69629e+07	1.04729e+07
Multiple Partners		3.49658e+09	8.33819e+09	4.84161e+09	3.49658e+09	8.33819e+09	1.43083e+11		Multiple Partners		2.71899e+09	6.47436e+09	3.75537e+09
Serodiscordant Couples		2.85662e+08	7.15739e+08	4.30077e+08	2.85662e+08	7.15739e+08	1.23259e+10		Serodiscordant Couples		2.65647e+08	6.60988e+08	3.95341e+08
Prisoners		1.01188e+08	1.62288e+08	6.10991e+07	1.01188e+08	1.62288e+08	2.71665e+09		Prisoners		9.0268e+07	1.44271e+08	5.40033e+07
Total		7.53233e+09	1.37931e+10	6.2608e+09	7.53233e+09	1.37931e+10	2.38382e+11		Total		6.23217e+09	1.11899e+10	4.95768e+09
Condoms use versus required in 2015, millions, all countries						Condoms use versus required in 2015, millions, Fast Track countries
Risk group		Current use, 2015	Required, 2016	Gap		Risk group		Current use, 2015	Required, 2016	Gap
SW		2463.5	2869.37	405.863		SW		2214.53	2551.09	336.566
MSM		1089.93	1599.13	509.201		MSM		866.249	1272.18	405.93
Transgender		95.4651	108.408	12.9432		Transgender		76.49	86.9629	10.4729
Multiple Partners		3496.58	8338.19	4841.61		Multiple Partners		2718.99	6474.36	3755.37
Serodiscordant Couples		285.662	715.739	430.077		Serodiscordant Couples		265.647	660.988	395.341
Prisoners		101.188	162.288	61.0991		Prisoners		90.268	144.271	54.0033
Total		7532.33	13793.1	6260.8		Total		6232.17	11189.9	4957.68
Total condoms required, low scenario
Country	FastTrack?	2015	2016	2017	2018	2019	2020	2021	2022	2023	2024	2025	2026	2027	2028	2029	2030	Total, 2015-30
Afghanistan		9.69128e+06	1.00305e+07	1.03818e+07	1.07454e+07	1.11219e+07	1.15117e+07	1.18721e+07	1.22442e+07	1.26282e+07	1.30246e+07	1.34339e+07	1.37748e+07	1.4125e+07	1.44847e+07	1.48542e+07	1.52338e+07	1.99158e+08
Angola	Yes	3.81888e+07	3.95982e+07	4.10508e+07	4.25465e+07	4.40856e+07	4.56731e+07	4.73101e+07	4.90058e+07	5.07623e+07	5.25818e+07	5.44665e+07	5.6322e+07	5.82408e+07	6.02249e+07	6.22767e+07	6.43983e+07	8.06732e+08
Azerbaijan		8.69349e+06	8.70298e+06	8.71254e+06	8.72211e+06	8.73176e+06	8.74151e+06	8.75983e+06	8.77851e+06	8.79755e+06	8.81696e+06	8.83676e+06	8.94637e+06	9.0575e+06	9.17017e+06	9.28441e+06	9.40024e+06	1.42153e+08
Bangladesh		5.49753e+07	5.57249e+07	5.64856e+07	5.72569e+07	5.80392e+07	5.88324e+07	5.94599e+07	6.00946e+07	6.07366e+07	6.13859e+07	6.20427e+07	6.24915e+07	6.29444e+07	6.34015e+07	6.38628e+07	6.43284e+07	9.62063e+08
Benin		1.71234e+07	1.76345e+07	1.81595e+07	1.86993e+07	1.92545e+07	1.98259e+07	2.03866e+07	2.09636e+07	2.15574e+07	2.21684e+07	2.27972e+07	2.33904e+07	2.39994e+07	2.46246e+07	2.52666e+07	2.59256e+07	3.41777e+08
Bolivia (Plurinational State of)		2.66301e+07	2.71121e+07	2.76028e+07	2.81024e+07	2.86111e+07	2.91289e+07	2.96087e+07	3.00965e+07	3.05923e+07	3.10964e+07	3.16089e+07	3.20498e+07	3.24971e+07	3.29508e+07	3.34111e+07	3.3878e+07	4.84977e+08
Botswana	Yes	1.19977e+07	1.21714e+07	1.23428e+07	1.25112e+07	1.26792e+07	1.28439e+07	1.29918e+07	1.31417e+07	1.32937e+07	1.34478e+07	1.36041e+07	1.37479e+07	1.38936e+07	1.40411e+07	1.41905e+07	1.43419e+07	2.1124e+08
Brazil	Yes	7.66829e+08	7.72922e+08	7.79068e+08	7.85267e+08	7.9152e+08	7.97826e+08	8.01024e+08	8.04246e+08	8.07492e+08	8.10764e+08	8.1406e+08	8.14935e+08	8.15828e+08	8.1674e+08	8.1767e+08	8.18619e+08	1.28148e+10
Burkina Faso		3.4627e+07	3.5786e+07	3.69828e+07	3.82193e+07	3.94966e+07	4.08166e+07	4.21639e+07	4.35564e+07	4.49958e+07	4.64834e+07	4.80211e+07	4.9487e+07	5.09984e+07	5.25566e+07	5.41631e+07	5.58195e+07	7.14174e+08
Burundi		4.54156e+06	4.66398e+06	4.79223e+06	4.92486e+06	5.06139e+06	5.20175e+06	5.36728e+06	5.5385e+06	5.71563e+06	5.89885e+06	6.08837e+06	6.28978e+06	6.49829e+06	6.71417e+06	6.93765e+06	7.16901e+06	9.14033e+07
Cambodia		1.70724e+07	1.72731e+07	1.74788e+07	1.76906e+07	1.79092e+07	1.81337e+07	1.84003e+07	1.86727e+07	1.89513e+07	1.92358e+07	1.95266e+07	1.98399e+07	2.016e+07	2.0487e+07	2.0821e+07	2.1162e+07	3.02814e+08
Cameroon	Yes	9.09954e+07	9.35039e+07	9.60855e+07	9.87421e+07	1.01476e+08	1.0429e+08	1.07084e+08	1.09957e+08	1.12911e+08	1.15948e+08	1.1907e+08	1.22063e+08	1.25134e+08	1.28286e+08	1.31521e+08	1.34841e+08	1.79191e+09
Central African Republic		1.27197e+07	1.30006e+07	1.32924e+07	1.35954e+07	1.39093e+07	1.42334e+07	1.45278e+07	1.48285e+07	1.51357e+07	1.54494e+07	1.57699e+07	1.60817e+07	1.63999e+07	1.67246e+07	1.70559e+07	1.7394e+07	2.40118e+08
Chad	Yes	1.35196e+07	1.39988e+07	1.45007e+07	1.50236e+07	1.55665e+07	1.61284e+07	1.66783e+07	1.72476e+07	1.7837e+07	1.84473e+07	1.90791e+07	1.96941e+07	2.03295e+07	2.0986e+07	2.16643e+07	2.23651e+07	2.83066e+08
China	Yes	1.53718e+09	1.53724e+09	1.53734e+09	1.5375e+09	1.53772e+09	1.53799e+09	1.54126e+09	1.54459e+09	1.54798e+09	1.55142e+09	1.55492e+09	1.55858e+09	1.56228e+09	1.566e+09	1.56975e+09	1.57353e+09	2.47953e+10
Comoros		1.04126e+06	1.06757e+06	1.09454e+06	1.1222e+06	1.15055e+06	1.17962e+06	1.20888e+06	1.23887e+06	1.2696e+06	1.3011e+06	1.33337e+06	1.36439e+06	1.39613e+06	1.4286e+06	1.46183e+06	1.49584e+06	2.01543e+07
Congo		1.67706e+07	1.72282e+07	1.76973e+07	1.8179e+07	1.86739e+07	1.91835e+07	1.97399e+07	2.03124e+07	2.09017e+07	2.15081e+07	2.21322e+07	2.27671e+07	2.34203e+07	2.40923e+07	2.47837e+07	2.5495e+07	3.32885e+08
Côte d'Ivoire	Yes	7.37663e+07	7.56055e+07	7.75064e+07	7.94554e+07	8.14511e+07	8.34934e+07	8.54794e+07	8.75149e+07	8.96013e+07	9.17399e+07	9.39319e+07	9.62217e+07	9.85698e+07	1.00978e+08	1.03447e+08	1.05979e+08	1.42474e+09
Democratic People's Republic of Korea	0	2.43476e+07	2.44238e+07	2.45008e+07	2.45788e+07	2.46577e+07	2.47375e+07	2.47759e+07	2.48151e+07	2.4855e+07	2.48958e+07	2.49373e+07	2.50355e+07	2.51341e+07	2.52331e+07	2.53324e+07	2.54322e+07	3.97693e+08
Democratic Republic of the Congo	Yes	6.41714e+08	6.64023e+08	6.8711e+08	7.11003e+08	7.35728e+08	7.61313e+08	7.8812e+08	8.15873e+08	8.44603e+08	8.74346e+08	9.05137e+08	9.35869e+08	9.67645e+08	1.0005e+09	1.03447e+09	1.0696e+09	1.34371e+10
Djibouti		1.29305e+06	1.31175e+06	1.33078e+06	1.35013e+06	1.36983e+06	1.38986e+06	1.40937e+06	1.42916e+06	1.44924e+06	1.46961e+06	1.49027e+06	1.50815e+06	1.52627e+06	1.54462e+06	1.5632e+06	1.58203e+06	2.30173e+07
Egypt		1.73689e+07	1.76644e+07	1.79653e+07	1.82715e+07	1.85828e+07	1.88993e+07	1.92288e+07	1.95647e+07	1.99071e+07	2.02562e+07	2.06121e+07	2.10325e+07	2.14623e+07	2.19017e+07	2.23512e+07	2.28109e+07	3.1788e+08
Equatorial Guinea		1.10018e+06	1.12801e+06	1.1563e+06	1.18519e+06	1.21489e+06	1.24549e+06	1.27827e+06	1.31202e+06	1.3468e+06	1.38262e+06	1.41951e+06	1.45688e+06	1.49536e+06	1.53497e+06	1.57575e+06	1.61773e+06	2.145e+07
Eritrea		6.8363e+06	7.05042e+06	7.27148e+06	7.49966e+06	7.73512e+06	7.97801e+06	8.23783e+06	8.50616e+06	8.7833e+06	9.06953e+06	9.36515e+06	9.62026e+06	9.88239e+06	1.01517e+07	1.04285e+07	1.07129e+07	1.39129e+08
Ethiopia	Yes	3.26925e+07	3.37258e+07	3.47931e+07	3.5895e+07	3.70286e+07	3.81958e+07	3.92438e+07	4.03216e+07	4.14301e+07	4.257e+07	4.37424e+07	4.48325e+07	4.59506e+07	4.70974e+07	4.82737e+07	4.94801e+07	6.55273e+08
Gabon		8.28325e+06	8.45807e+06	8.63793e+06	8.82198e+06	9.01021e+06	9.20279e+06	9.39515e+06	9.59196e+06	9.79332e+06	9.99934e+06	1.02101e+07	1.04184e+07	1.06313e+07	1.08489e+07	1.10714e+07	1.12989e+07	1.55673e+08
Gambia		1.67692e+06	1.73226e+06	1.78974e+06	1.84921e+06	1.91065e+06	1.97379e+06	2.04095e+06	2.11044e+06	2.18234e+06	2.25675e+06	2.33373e+06	2.41179e+06	2.4925e+06	2.57596e+06	2.66226e+06	2.75151e+06	3.47508e+07
Ghana	Yes	4.4653e+07	4.56746e+07	4.6718e+07	4.77884e+07	4.88807e+07	4.99966e+07	5.11429e+07	5.23169e+07	5.35195e+07	5.47514e+07	5.60131e+07	5.73204e+07	5.86598e+07	6.00321e+07	6.1438e+07	6.28784e+07	8.51784e+08
Guatemala		5.05215e+07	5.18676e+07	5.32546e+07	5.46821e+07	5.61494e+07	5.76569e+07	5.89793e+07	6.03321e+07	6.17159e+07	6.31316e+07	6.45798e+07	6.58759e+07	6.71982e+07	6.85473e+07	6.99236e+07	7.13278e+07	9.75744e+08
Guinea		1.73026e+07	1.78451e+07	1.84017e+07	1.89729e+07	1.95577e+07	2.01566e+07	2.07514e+07	2.13639e+07	2.19945e+07	2.26439e+07	2.33125e+07	2.39734e+07	2.4653e+07	2.53521e+07	2.6071e+07	2.68103e+07	3.49163e+08
Guinea-Bissau		4.90897e+06	5.02905e+06	5.15312e+06	5.28094e+06	5.41247e+06	5.54692e+06	5.68128e+06	5.81895e+06	5.96004e+06	6.10461e+06	6.25276e+06	6.39995e+06	6.55066e+06	6.70498e+06	6.86301e+06	7.02484e+06	9.46925e+07
Haiti	Yes	5.7177e+07	5.8081e+07	5.8998e+07	5.99268e+07	6.08678e+07	6.1821e+07	6.2744e+07	6.36809e+07	6.46318e+07	6.55969e+07	6.65766e+07	6.73409e+07	6.81143e+07	6.88968e+07	6.96886e+07	7.04898e+07	1.02463e+09
India	Yes	3.37764e+08	3.42494e+08	3.47325e+08	3.5227e+08	3.57325e+08	3.62492e+08	3.6718e+08	3.71931e+08	3.76744e+08	3.81622e+08	3.86565e+08	3.90419e+08	3.94313e+08	3.98248e+08	4.02224e+08	4.06243e+08	5.97516e+09
Indonesia	Yes	1.42094e+08	1.43953e+08	1.45793e+08	1.47619e+08	1.49431e+08	1.51233e+08	1.52754e+08	1.54291e+08	1.55846e+08	1.57417e+08	1.59007e+08	1.60603e+08	1.62217e+08	1.63849e+08	1.65498e+08	1.67165e+08	2.47877e+09
Iran (Islamic Republic of)	Yes	4.86155e+07	4.90071e+07	4.94023e+07	4.98008e+07	5.02031e+07	5.06089e+07	5.11666e+07	5.17317e+07	5.23043e+07	5.28844e+07	5.34723e+07	5.40071e+07	5.4549e+07	5.50982e+07	5.56549e+07	5.6219e+07	8.34725e+08
Iraq		3.68236e+07	3.79302e+07	3.90701e+07	4.02442e+07	4.14537e+07	4.26995e+07	4.39927e+07	4.53252e+07	4.66981e+07	4.81127e+07	4.95701e+07	5.10467e+07	5.25672e+07	5.41332e+07	5.57458e+07	5.74066e+07	7.4282e+08
Jamaica	Yes	2.01671e+07	2.01587e+07	2.01488e+07	2.01383e+07	2.01279e+07	2.01175e+07	2.00879e+07	2.00586e+07	2.00295e+07	2.00007e+07	1.99722e+07	1.99226e+07	1.98733e+07	1.98243e+07	1.97755e+07	1.9727e+07	3.2013e+08
Kenya	Yes	1.05064e+08	1.08235e+08	1.1151e+08	1.14858e+08	1.18292e+08	1.21819e+08	1.25328e+08	1.28938e+08	1.32652e+08	1.36474e+08	1.40406e+08	1.44064e+08	1.47819e+08	1.51672e+08	1.55626e+08	1.59685e+08	2.10244e+09
Kyrgyzstan		1.55498e+07	1.56511e+07	1.57529e+07	1.58551e+07	1.59577e+07	1.60604e+07	1.62535e+07	1.64491e+07	1.66472e+07	1.68478e+07	1.70511e+07	1.73856e+07	1.77267e+07	1.80745e+07	1.84293e+07	1.8791e+07	2.68483e+08
Lao People's Democratic Republic		5.71066e+06	5.83058e+06	5.95253e+06	6.07644e+06	6.20234e+06	6.33031e+06	6.46292e+06	6.5983e+06	6.73653e+06	6.87767e+06	7.02177e+06	7.15683e+06	7.2945e+06	7.43483e+06	7.57788e+06	7.72369e+06	1.06988e+08
Lesotho	Yes	1.15747e+07	1.17841e+07	1.19921e+07	1.22007e+07	1.24101e+07	1.26198e+07	1.27998e+07	1.29824e+07	1.31678e+07	1.33559e+07	1.35468e+07	1.37383e+07	1.39326e+07	1.41298e+07	1.43299e+07	1.4533e+07	2.09098e+08
Liberia		5.56747e+06	5.73216e+06	5.90295e+06	6.07985e+06	6.2628e+06	6.45177e+06	6.63382e+06	6.82111e+06	7.01379e+06	7.21202e+06	7.41596e+06	7.60385e+06	7.79658e+06	7.99428e+06	8.19708e+06	8.40511e+06	1.11091e+08
Madagascar		2.23166e+07	2.30145e+07	2.37344e+07	2.44771e+07	2.52431e+07	2.60333e+07	2.68049e+07	2.75994e+07	2.84176e+07	2.92601e+07	3.01276e+07	3.09892e+07	3.18755e+07	3.27872e+07	3.37251e+07	3.469e+07	4.51096e+08
Malawi	Yes	1.89355e+07	1.94483e+07	1.99749e+07	2.05171e+07	2.10764e+07	2.1654e+07	2.22407e+07	2.28477e+07	2.34757e+07	2.41254e+07	2.47977e+07	2.54515e+07	2.61267e+07	2.68239e+07	2.75438e+07	2.82873e+07	3.73327e+08
Mali	Yes	1.26908e+07	1.31243e+07	1.35728e+07	1.40365e+07	1.45156e+07	1.50103e+07	1.55532e+07	1.61157e+07	1.66988e+07	1.73029e+07	1.79291e+07	1.85505e+07	1.91935e+07	1.98589e+07	2.05475e+07	2.126e+07	2.6596e+08
Mauritania		4.18785e+06	4.29458e+06	4.40403e+06	4.51614e+06	4.63092e+06	4.74859e+06	4.86355e+06	4.98135e+06	5.10203e+06	5.22569e+06	5.35239e+06	5.4732e+06	5.59678e+06	5.72319e+06	5.85249e+06	5.98474e+06	8.09375e+07
Mexico		4.38758e+08	4.44063e+08	4.49428e+08	4.54855e+08	4.60347e+08	4.65905e+08	4.7018e+08	4.745e+08	4.78867e+08	4.83281e+08	4.87743e+08	4.91442e+08	4.95176e+08	4.98944e+08	5.02749e+08	5.06589e+08	7.60283e+09
Morocco		1.63494e+07	1.65278e+07	1.67083e+07	1.68907e+07	1.70753e+07	1.72612e+07	1.74628e+07	1.76668e+07	1.78733e+07	1.80824e+07	1.8294e+07	1.8514e+07	1.87367e+07	1.89623e+07	1.91907e+07	1.9422e+07	2.85018e+08
Mozambique	Yes	9.76343e+07	1.00708e+08	1.03888e+08	1.07179e+08	1.10582e+08	1.14104e+08	1.17679e+08	1.21376e+08	1.25198e+08	1.29149e+08	1.33234e+08	1.37211e+08	1.41314e+08	1.45549e+08	1.49918e+08	1.54427e+08	1.98915e+09
Myanmar	Yes	4.73984e+07	4.80756e+07	4.8763e+07	4.94605e+07	5.01684e+07	5.08868e+07	5.14694e+07	5.20591e+07	5.26559e+07	5.326e+07	5.38714e+07	5.42682e+07	5.46682e+07	5.50715e+07	5.54782e+07	5.58883e+07	8.33443e+08
Namibia	Yes	8.82437e+06	9.17223e+06	9.50751e+06	9.82528e+06	1.01185e+07	1.03806e+07	1.06368e+07	1.08995e+07	1.11691e+07	1.14457e+07	1.17294e+07	1.20319e+07	1.23425e+07	1.26613e+07	1.29886e+07	1.33246e+07	1.77058e+08
Nepal		4.20324e+07	4.29761e+07	4.39434e+07	4.49348e+07	4.59508e+07	4.69919e+07	4.78464e+07	4.87169e+07	4.96036e+07	5.05069e+07	5.14271e+07	5.21056e+07	5.27934e+07	5.34906e+07	5.41973e+07	5.49136e+07	7.82431e+08
Niger		1.03039e+07	1.07255e+07	1.11645e+07	1.16215e+07	1.20973e+07	1.25928e+07	1.31316e+07	1.36938e+07	1.42803e+07	1.48923e+07	1.55308e+07	1.62006e+07	1.68996e+07	1.7629e+07	1.83902e+07	1.91844e+07	2.28338e+08
Nigeria	Yes	1.94874e+08	2.00124e+08	2.05475e+08	2.10949e+08	2.16554e+08	2.22293e+08	2.28229e+08	2.34334e+08	2.40614e+08	2.47073e+08	2.53716e+08	2.60447e+08	2.67367e+08	2.74482e+08	2.81797e+08	2.89318e+08	3.82765e+09
Pakistan	Yes	6.13483e+07	6.27437e+07	6.42089e+07	6.5756e+07	6.74003e+07	6.91614e+07	7.11188e+07	7.32361e+07	7.5545e+07	7.80843e+07	8.09023e+07	8.40253e+07	8.75583e+07	9.15919e+07	9.62381e+07	1.01635e+08	1.23055e+09
Papua New Guinea		6.07601e+06	6.2293e+06	6.38654e+06	6.54773e+06	6.71301e+06	6.88245e+06	7.04333e+06	7.20798e+06	7.3765e+06	7.54898e+06	7.72551e+06	7.88774e+06	8.05339e+06	8.22254e+06	8.39527e+06	8.57166e+06	1.16868e+08
Peru		7.28534e+07	7.37034e+07	7.45645e+07	7.5437e+07	7.6321e+07	7.72168e+07	7.80938e+07	7.89816e+07	7.98806e+07	8.07909e+07	8.17125e+07	8.25392e+07	8.33755e+07	8.42215e+07	8.50774e+07	8.59433e+07	1.27071e+09
Philippines		8.65761e+07	8.80093e+07	8.94554e+07	9.09296e+07	9.24315e+07	9.39617e+07	9.54386e+07	9.69451e+07	9.84826e+07	1.00052e+08	1.01656e+08	1.03184e+08	1.04746e+08	1.06344e+08	1.0798e+08	1.09657e+08	1.56585e+09
Russian Federation	Yes	3.80559e+08	3.78929e+08	3.77233e+08	3.75471e+08	3.73648e+08	3.71779e+08	3.70106e+08	3.68453e+08	3.6682e+08	3.65206e+08	3.63611e+08	3.62861e+08	3.62121e+08	3.61391e+08	3.60672e+08	3.59963e+08	5.89882e+09
Rwanda		8.34017e+06	8.58916e+06	8.83961e+06	9.09386e+06	9.3512e+06	9.61296e+06	9.87881e+06	1.01527e+07	1.0435e+07	1.07259e+07	1.10257e+07	1.12805e+07	1.15418e+07	1.18095e+07	1.20839e+07	1.23652e+07	1.65126e+08
Sao Tome and Principe		233689	239346	245074	250898	256821	262879	269091	275472	282026	288759	295673	301502	307464	313563	319801	326181	4.46824e+06
Senegal		1.2362e+07	1.27479e+07	1.31461e+07	1.35572e+07	1.39821e+07	1.44212e+07	1.48816e+07	1.53572e+07	1.58485e+07	1.63559e+07	1.688e+07	1.74339e+07	1.80065e+07	1.85983e+07	1.921e+07	1.98424e+07	2.52631e+08
Solomon Islands		2.04983e+06	2.11412e+06	2.18042e+06	2.2488e+06	2.31932e+06	2.39206e+06	2.47077e+06	2.55208e+06	2.63606e+06	2.7228e+06	2.8124e+06	2.89215e+06	2.97417e+06	3.05852e+06	3.14527e+06	3.23449e+06	4.18033e+07
Sierra Leone		6.30277e+06	6.47289e+06	6.64794e+06	6.82759e+06	7.01179e+06	7.20051e+06	7.38372e+06	7.57166e+06	7.76448e+06	7.96228e+06	8.16521e+06	8.34781e+06	8.53455e+06	8.72553e+06	8.92085e+06	9.12061e+06	1.2296e+08
Somalia		9.13941e+06	9.42586e+06	9.72174e+06	1.00273e+07	1.03427e+07	1.06684e+07	1.10233e+07	1.139e+07	1.1769e+07	1.21605e+07	1.25651e+07	1.29693e+07	1.33866e+07	1.38173e+07	1.42619e+07	1.47208e+07	1.87389e+08
South Africa	Yes	2.70592e+08	2.7311e+08	2.75412e+08	2.77668e+08	2.7988e+08	2.82057e+08	2.84666e+08	2.87299e+08	2.89956e+08	2.92639e+08	2.95346e+08	2.97777e+08	3.00228e+08	3.02699e+08	3.05191e+08	3.07703e+08	4.62222e+09
South Sudan	Yes	1.93766e+07	1.99657e+07	2.05708e+07	2.11938e+07	2.1836e+07	2.24982e+07	2.31382e+07	2.37965e+07	2.44738e+07	2.51706e+07	2.58874e+07	2.65713e+07	2.72733e+07	2.7994e+07	2.8734e+07	2.94937e+07	3.87974e+08
Sudan		9.60148e+06	9.88275e+06	1.01736e+07	1.04736e+07	1.07829e+07	1.11008e+07	1.14071e+07	1.1722e+07	1.20456e+07	1.23783e+07	1.27204e+07	1.30436e+07	1.33752e+07	1.37155e+07	1.40645e+07	1.44227e+07	1.9091e+08
Swaziland	Yes	5.31299e+06	5.39114e+06	5.46696e+06	5.54175e+06	5.61587e+06	5.68932e+06	5.76724e+06	5.84644e+06	5.92695e+06	6.00879e+06	6.09197e+06	6.17448e+06	6.25832e+06	6.3435e+06	6.43006e+06	6.518e+06	9.43838e+07
Tajikistan		2.4292e+07	2.46744e+07	2.50603e+07	2.54505e+07	2.58455e+07	2.62466e+07	2.67105e+07	2.71827e+07	2.76633e+07	2.81526e+07	2.86507e+07	2.92787e+07	2.99206e+07	3.05765e+07	3.1247e+07	3.19321e+07	4.42884e+08
Togo		1.21007e+07	1.24208e+07	1.27481e+07	1.30844e+07	1.34307e+07	1.37881e+07	1.41453e+07	1.45151e+07	1.48977e+07	1.52935e+07	1.57027e+07	1.60837e+07	1.64764e+07	1.68812e+07	1.72982e+07	1.77279e+07	2.36594e+08
Turkmenistan		1.63823e+07	1.65491e+07	1.67177e+07	1.6888e+07	1.706e+07	1.72339e+07	1.73848e+07	1.75371e+07	1.76909e+07	1.7846e+07	1.80026e+07	1.814e+07	1.82785e+07	1.84181e+07	1.85588e+07	1.87007e+07	2.81388e+08
Uganda	Yes	5.04407e+07	5.23606e+07	5.43346e+07	5.6368e+07	5.84594e+07	6.0609e+07	6.27642e+07	6.49969e+07	6.73097e+07	6.97056e+07	7.21877e+07	7.45929e+07	7.70787e+07	7.96479e+07	8.23034e+07	8.50479e+07	1.06821e+09
Ukraine	Yes	1.27844e+08	1.26237e+08	1.24668e+08	1.23151e+08	1.21629e+08	1.20107e+08	1.19229e+08	1.18358e+08	1.17494e+08	1.16637e+08	1.15787e+08	1.14861e+08	1.13943e+08	1.13033e+08	1.1213e+08	1.11236e+08	1.89634e+09
United Republic of Tanzania	Yes	1.00895e+08	1.03989e+08	1.07164e+08	1.10423e+08	1.1378e+08	1.17239e+08	1.20975e+08	1.24837e+08	1.28831e+08	1.32961e+08	1.37231e+08	1.41609e+08	1.46135e+08	1.50814e+08	1.55651e+08	1.60651e+08	2.05318e+09
United States of America	Yes	7.37162e+08	7.40157e+08	7.43148e+08	7.46133e+08	7.49112e+08	7.52083e+08	7.56018e+08	7.5998e+08	7.63969e+08	7.67984e+08	7.72027e+08	7.75947e+08	7.79891e+08	7.83862e+08	7.87859e+08	7.91882e+08	1.22072e+10
Uzbekistan		9.05692e+07	9.13793e+07	9.22029e+07	9.30401e+07	9.38902e+07	9.47528e+07	9.57634e+07	9.67858e+07	9.78199e+07	9.8866e+07	9.99241e+07	1.01048e+08	1.02186e+08	1.03337e+08	1.04502e+08	1.0568e+08	1.56175e+09
Viet Nam	Yes	7.07132e+07	7.11458e+07	7.15584e+07	7.19555e+07	7.23415e+07	7.27206e+07	7.32242e+07	7.37335e+07	7.42486e+07	7.47696e+07	7.52964e+07	7.58241e+07	7.63573e+07	7.68963e+07	7.7441e+07	7.79914e+07	1.18622e+09
Yemen		8.15481e+06	8.39193e+06	8.63609e+06	8.88743e+06	9.14609e+06	9.41231e+06	9.66779e+06	9.93036e+06	1.02002e+07	1.04776e+07	1.07626e+07	1.10304e+07	1.13051e+07	1.15869e+07	1.1876e+07	1.21727e+07	1.61638e+08
Zambia	Yes	2.85733e+07	2.95078e+07	3.04554e+07	3.14181e+07	3.23973e+07	3.33915e+07	3.43881e+07	3.54157e+07	3.64753e+07	3.7568e+07	3.86948e+07	3.97887e+07	4.09147e+07	4.20737e+07	4.32666e+07	4.44945e+07	5.78823e+08
Zimbabwe	Yes	2.50093e+07	2.545e+07	2.59021e+07	2.63658e+07	2.68415e+07	2.73294e+07	2.78513e+07	2.83872e+07	2.89376e+07	2.95027e+07	3.00829e+07	3.06683e+07	3.12692e+07	3.1886e+07	3.25191e+07	3.31689e+07	4.61171e+08
Total		7.53233e+09	7.62413e+09	7.71792e+09	7.814e+09	7.91241e+09	8.01326e+09	8.11592e+09	8.22143e+09	8.3299e+09	8.44146e+09	8.55623e+09	8.66594e+09	8.77884e+09	8.89511e+09	9.01495e+09	9.13858e+09	1.32772e+11
Total condoms required, medium scenario
Country	FastTrack?	2015	2016	2017	2018	2019	2020	2021	2022	2023	2024	2025	2026	2027	2028	2029	2030	Total, 2015-30
Afghanistan		9.69128e+06	1.00305e+07	1.03818e+07	1.07454e+07	1.11219e+07	1.15117e+07	1.18721e+07	1.22442e+07	1.26282e+07	1.30246e+07	1.34339e+07	1.37748e+07	1.4125e+07	1.44847e+07	1.48542e+07	1.52338e+07	1.99158e+08
Angola	Yes	3.81888e+07	3.95982e+07	4.10508e+07	4.25465e+07	4.40856e+07	4.56731e+07	4.73101e+07	4.90058e+07	5.07623e+07	5.25818e+07	5.44665e+07	5.6322e+07	5.82408e+07	6.02249e+07	6.22767e+07	6.43983e+07	8.06732e+08
Azerbaijan		8.69349e+06	8.70298e+06	8.71254e+06	8.72211e+06	8.73176e+06	8.74151e+06	8.75983e+06	8.77851e+06	8.79755e+06	8.81696e+06	8.83676e+06	8.94637e+06	9.0575e+06	9.17017e+06	9.28441e+06	9.40024e+06	1.42153e+08
Bangladesh		5.49753e+07	5.57249e+07	5.64856e+07	5.72569e+07	5.80392e+07	5.88324e+07	5.94599e+07	6.00946e+07	6.07366e+07	6.13859e+07	6.20427e+07	6.24915e+07	6.29444e+07	6.34015e+07	6.38628e+07	6.43284e+07	9.62063e+08
Benin		1.71234e+07	1.76345e+07	1.81595e+07	1.86993e+07	1.92545e+07	1.98259e+07	2.03866e+07	2.09636e+07	2.15574e+07	2.21684e+07	2.27972e+07	2.33904e+07	2.39994e+07	2.46246e+07	2.52666e+07	2.59256e+07	3.41777e+08
Bolivia (Plurinational State of)		2.66301e+07	2.73673e+07	2.81224e+07	2.8896e+07	2.96884e+07	3.05e+07	3.12788e+07	3.20742e+07	3.28866e+07	3.37163e+07	3.45637e+07	3.53381e+07	3.61262e+07	3.69283e+07	3.77445e+07	3.85752e+07	5.20436e+08
Botswana	Yes	1.19977e+07	1.21714e+07	1.23428e+07	1.25112e+07	1.26792e+07	1.28439e+07	1.29918e+07	1.31417e+07	1.32937e+07	1.34478e+07	1.36041e+07	1.37479e+07	1.38936e+07	1.40411e+07	1.41905e+07	1.43419e+07	2.1124e+08
Brazil	Yes	7.66829e+08	7.72922e+08	7.79068e+08	7.85267e+08	7.9152e+08	7.97826e+08	8.01024e+08	8.04246e+08	8.07492e+08	8.10764e+08	8.1406e+08	8.14935e+08	8.15828e+08	8.1674e+08	8.1767e+08	8.18619e+08	1.28148e+10
Burkina Faso		3.4627e+07	3.5786e+07	3.69828e+07	3.82193e+07	3.94966e+07	4.08166e+07	4.21639e+07	4.35564e+07	4.49958e+07	4.64834e+07	4.80211e+07	4.9487e+07	5.09984e+07	5.25566e+07	5.41631e+07	5.58195e+07	7.14174e+08
Burundi		4.54156e+06	4.66398e+06	4.79223e+06	4.92486e+06	5.06139e+06	5.20175e+06	5.36728e+06	5.5385e+06	5.71563e+06	5.89885e+06	6.08837e+06	6.28978e+06	6.49829e+06	6.71417e+06	6.93765e+06	7.16901e+06	9.14033e+07
Cambodia		1.70724e+07	1.7651e+07	1.82469e+07	1.88614e+07	1.94956e+07	2.00777e+07	2.0584e+07	2.10932e+07	2.1416e+07	2.17456e+07	2.20822e+07	2.24404e+07	2.28062e+07	2.31796e+07	2.35609e+07	2.395e+07	3.34263e+08
Cameroon	Yes	9.09954e+07	9.5468e+07	1.00122e+08	1.04963e+08	1.1e+08	1.15239e+08	1.20573e+08	1.26112e+08	1.31866e+08	1.3784e+08	1.44044e+08	1.50217e+08	1.56612e+08	1.63235e+08	1.70096e+08	1.77201e+08	2.09458e+09
Central African Republic		1.27197e+07	1.32501e+07	1.38026e+07	1.43779e+07	1.49766e+07	1.55985e+07	1.6199e+07	1.68176e+07	1.74549e+07	1.81114e+07	1.87876e+07	1.94644e+07	2.01606e+07	2.08764e+07	2.16126e+07	2.23695e+07	2.76579e+08
Chad	Yes	1.35196e+07	1.46672e+07	1.58855e+07	1.71757e+07	1.85397e+07	1.9979e+07	2.14563e+07	2.30119e+07	2.46495e+07	2.63731e+07	2.81867e+07	3.00345e+07	3.1973e+07	3.40061e+07	3.6138e+07	3.83732e+07	3.93969e+08
China	Yes	1.53718e+09	1.53724e+09	1.53734e+09	1.5375e+09	1.53772e+09	1.53799e+09	1.54126e+09	1.54459e+09	1.54798e+09	1.55142e+09	1.55492e+09	1.55858e+09	1.56228e+09	1.566e+09	1.56975e+09	1.57353e+09	2.47953e+10
Comoros		1.04126e+06	1.06757e+06	1.09454e+06	1.1222e+06	1.15055e+06	1.17962e+06	1.20888e+06	1.23887e+06	1.2696e+06	1.3011e+06	1.33337e+06	1.36439e+06	1.39613e+06	1.4286e+06	1.46183e+06	1.49584e+06	2.01543e+07
Congo		1.67706e+07	1.72628e+07	1.77683e+07	1.82885e+07	1.88239e+07	1.93762e+07	1.99783e+07	2.05992e+07	2.12396e+07	2.19e+07	2.25812e+07	2.32763e+07	2.3993e+07	2.47311e+07	2.5456e+07	2.62023e+07	3.38247e+08
Côte d'Ivoire	Yes	7.37663e+07	7.56055e+07	7.75064e+07	7.94554e+07	8.14511e+07	8.34934e+07	8.54794e+07	8.75149e+07	8.96013e+07	9.17399e+07	9.39319e+07	9.62217e+07	9.85698e+07	1.00978e+08	1.03447e+08	1.05979e+08	1.42474e+09
Democratic People's Republic of Korea		2.43476e+07	2.44238e+07	2.45008e+07	2.45788e+07	2.46577e+07	2.47375e+07	2.47759e+07	2.48151e+07	2.4855e+07	2.48958e+07	2.49373e+07	2.50355e+07	2.51341e+07	2.52331e+07	2.53324e+07	2.54322e+07	3.97693e+08
Democratic Republic of the Congo	Yes	6.41714e+08	6.7563e+08	7.1113e+08	7.48285e+08	7.87165e+08	8.27843e+08	8.70771e+08	9.15698e+08	9.62712e+08	1.0119e+09	1.06337e+09	1.11584e+09	1.17066e+09	1.22791e+09	1.28771e+09	1.35015e+09	1.53685e+10
Djibouti		1.29305e+06	1.43472e+06	1.57993e+06	1.72878e+06	1.88139e+06	2.03782e+06	2.19658e+06	2.35899e+06	2.52511e+06	2.69502e+06	2.86878e+06	3.03921e+06	3.21271e+06	3.38932e+06	3.56911e+06	3.75211e+06	3.95626e+07
Egypt		1.73689e+07	1.76644e+07	1.79653e+07	1.82715e+07	1.85828e+07	1.88993e+07	1.92288e+07	1.95647e+07	1.99071e+07	2.02562e+07	2.06121e+07	2.10325e+07	2.14623e+07	2.19017e+07	2.23512e+07	2.28109e+07	3.1788e+08
Equatorial Guinea		1.10018e+06	1.12801e+06	1.1563e+06	1.18519e+06	1.21489e+06	1.24549e+06	1.27827e+06	1.31202e+06	1.3468e+06	1.38262e+06	1.41951e+06	1.45688e+06	1.49536e+06	1.53497e+06	1.57575e+06	1.61773e+06	2.145e+07
Eritrea		6.8363e+06	7.68196e+06	8.57452e+06	9.51613e+06	1.0509e+07	1.15554e+07	1.26687e+07	1.38418e+07	1.50775e+07	1.63785e+07	1.77479e+07	1.90743e+07	2.04566e+07	2.18968e+07	2.3397e+07	2.49593e+07	2.40172e+08
Ethiopia	Yes	3.26925e+07	3.68408e+07	4.12137e+07	4.58205e+07	5.06654e+07	5.57584e+07	6.08528e+07	6.61717e+07	7.17237e+07	7.75176e+07	8.35628e+07	8.96363e+07	9.5946e+07	1.025e+08	1.09306e+08	1.16374e+08	1.13658e+09
Gabon		8.28325e+06	8.61324e+06	8.95483e+06	9.30739e+06	9.67116e+06	1.00465e+07	1.04285e+07	1.08225e+07	1.12288e+07	1.16478e+07	1.20799e+07	1.25165e+07	1.29662e+07	1.34295e+07	1.39067e+07	1.43982e+07	1.78301e+08
Gambia		1.67692e+06	1.73226e+06	1.78974e+06	1.84921e+06	1.91065e+06	1.97379e+06	2.04095e+06	2.11044e+06	2.18234e+06	2.25675e+06	2.33373e+06	2.41179e+06	2.4925e+06	2.57596e+06	2.66226e+06	2.75151e+06	3.47508e+07
Ghana	Yes	4.4653e+07	4.56746e+07	4.6718e+07	4.77884e+07	4.88807e+07	4.99966e+07	5.11429e+07	5.23169e+07	5.35195e+07	5.47514e+07	5.60131e+07	5.73204e+07	5.86598e+07	6.00321e+07	6.1438e+07	6.28784e+07	8.51784e+08
Guatemala		5.05215e+07	5.18676e+07	5.32546e+07	5.46821e+07	5.61494e+07	5.76569e+07	5.89793e+07	6.03321e+07	6.17159e+07	6.31316e+07	6.45798e+07	6.58759e+07	6.71982e+07	6.85473e+07	6.99236e+07	7.13278e+07	9.75744e+08
Guinea		1.73026e+07	1.78451e+07	1.84017e+07	1.89729e+07	1.95577e+07	2.01566e+07	2.07514e+07	2.13639e+07	2.19945e+07	2.26439e+07	2.33125e+07	2.39734e+07	2.4653e+07	2.53521e+07	2.6071e+07	2.68103e+07	3.49163e+08
Guinea-Bissau		4.90897e+06	5.02905e+06	5.15312e+06	5.28094e+06	5.41247e+06	5.54692e+06	5.68128e+06	5.81895e+06	5.96004e+06	6.10461e+06	6.25276e+06	6.39995e+06	6.55066e+06	6.70498e+06	6.86301e+06	7.02484e+06	9.46925e+07
Haiti	Yes	5.7177e+07	6.04721e+07	6.38552e+07	6.73265e+07	7.08879e+07	7.41436e+07	7.73567e+07	8.06472e+07	8.40166e+07	8.74664e+07	9.09984e+07	9.42791e+07	9.75384e+07	1.00826e+08	1.04172e+08	1.07574e+08	1.31874e+09
India	Yes	3.37764e+08	3.42494e+08	3.47325e+08	3.5227e+08	3.57325e+08	3.62492e+08	3.6718e+08	3.71931e+08	3.76744e+08	3.81622e+08	3.86565e+08	3.90419e+08	3.94313e+08	3.98248e+08	4.02224e+08	4.06243e+08	5.97516e+09
Indonesia	Yes	1.42094e+08	1.43953e+08	1.45793e+08	1.47619e+08	1.49431e+08	1.51233e+08	1.52754e+08	1.54291e+08	1.55846e+08	1.57417e+08	1.59007e+08	1.60603e+08	1.62217e+08	1.63849e+08	1.65498e+08	1.67165e+08	2.47877e+09
Iran (Islamic Republic of)	Yes	4.86155e+07	4.90071e+07	4.94023e+07	4.98008e+07	5.02031e+07	5.06089e+07	5.11666e+07	5.17317e+07	5.23043e+07	5.28844e+07	5.34723e+07	5.40071e+07	5.4549e+07	5.50982e+07	5.56549e+07	5.6219e+07	8.34725e+08
Iraq		3.68236e+07	3.79302e+07	3.90701e+07	4.02442e+07	4.14537e+07	4.26995e+07	4.39927e+07	4.53252e+07	4.66981e+07	4.81127e+07	4.95701e+07	5.10467e+07	5.25672e+07	5.41332e+07	5.57458e+07	5.74066e+07	7.4282e+08
Jamaica	Yes	2.01671e+07	2.01587e+07	2.01488e+07	2.01383e+07	2.01279e+07	2.01175e+07	2.00879e+07	2.00586e+07	2.00295e+07	2.00007e+07	1.99722e+07	1.99226e+07	1.98733e+07	1.98243e+07	1.97755e+07	1.9727e+07	3.2013e+08
Kenya	Yes	1.05064e+08	1.11703e+08	1.18656e+08	1.25899e+08	1.33454e+08	1.41336e+08	1.49373e+08	1.56807e+08	1.64543e+08	1.72591e+08	1.80962e+08	1.89157e+08	1.97647e+08	2.06347e+08	2.15363e+08	2.24704e+08	2.5936e+09
Kyrgyzstan		1.55498e+07	1.56511e+07	1.57529e+07	1.58551e+07	1.59577e+07	1.60604e+07	1.62535e+07	1.64491e+07	1.66472e+07	1.68478e+07	1.70511e+07	1.73856e+07	1.77267e+07	1.80745e+07	1.84293e+07	1.8791e+07	2.68483e+08
Lao People's Democratic Republic		5.71066e+06	5.99859e+06	6.29559e+06	6.56802e+06	6.79459e+06	7.02723e+06	7.26922e+06	7.5184e+06	7.77499e+06	8.03917e+06	8.31117e+06	8.57698e+06	8.85015e+06	9.13087e+06	9.41932e+06	9.7157e+06	1.23001e+08
Lesotho	Yes	1.15747e+07	1.17841e+07	1.19921e+07	1.22007e+07	1.24101e+07	1.26198e+07	1.27998e+07	1.29824e+07	1.31678e+07	1.33559e+07	1.35468e+07	1.37383e+07	1.39326e+07	1.41298e+07	1.43299e+07	1.4533e+07	2.09098e+08
Liberia		5.56747e+06	5.8052e+06	6.0534e+06	6.31233e+06	6.58214e+06	6.86304e+06	7.14149e+06	7.4191e+06	7.70109e+06	7.99322e+06	8.29584e+06	8.5847e+06	8.88298e+06	9.19098e+06	9.50901e+06	9.83738e+06	1.21739e+08
Madagascar		2.23166e+07	2.30145e+07	2.37344e+07	2.44771e+07	2.52431e+07	2.60333e+07	2.68049e+07	2.75994e+07	2.84176e+07	2.92601e+07	3.01276e+07	3.09892e+07	3.18755e+07	3.27872e+07	3.37251e+07	3.469e+07	4.51096e+08
Malawi	Yes	1.89355e+07	1.98931e+07	2.08867e+07	2.19192e+07	2.29931e+07	2.41108e+07	2.52617e+07	2.64601e+07	2.77082e+07	2.9008e+07	3.03617e+07	3.17185e+07	3.31282e+07	3.45931e+07	3.61154e+07	3.76973e+07	4.40791e+08
Mali	Yes	1.26908e+07	1.31243e+07	1.35728e+07	1.40365e+07	1.45156e+07	1.50103e+07	1.55532e+07	1.61157e+07	1.66988e+07	1.73029e+07	1.79291e+07	1.85505e+07	1.91935e+07	1.98589e+07	2.05475e+07	2.126e+07	2.6596e+08
Mauritania		4.18785e+06	4.29458e+06	4.40403e+06	4.51614e+06	4.63092e+06	4.74859e+06	4.86355e+06	4.98135e+06	5.10203e+06	5.22569e+06	5.35239e+06	5.4732e+06	5.59678e+06	5.72319e+06	5.85249e+06	5.98474e+06	8.09375e+07
Mexico		4.38758e+08	4.44063e+08	4.49428e+08	4.54855e+08	4.60347e+08	4.65905e+08	4.7018e+08	4.745e+08	4.78867e+08	4.83281e+08	4.87743e+08	4.91442e+08	4.95176e+08	4.98944e+08	5.02749e+08	5.06589e+08	7.60283e+09
Morocco		1.63494e+07	1.65278e+07	1.67083e+07	1.68907e+07	1.70753e+07	1.72612e+07	1.74628e+07	1.76668e+07	1.78733e+07	1.80824e+07	1.8294e+07	1.8514e+07	1.87367e+07	1.89623e+07	1.91907e+07	1.9422e+07	2.85018e+08
Mozambique	Yes	9.76343e+07	1.00708e+08	1.03888e+08	1.07179e+08	1.10582e+08	1.14104e+08	1.17679e+08	1.21376e+08	1.25198e+08	1.29149e+08	1.33234e+08	1.37211e+08	1.41314e+08	1.45549e+08	1.49918e+08	1.54427e+08	1.98915e+09
Myanmar	Yes	4.73984e+07	4.80756e+07	4.8763e+07	4.94605e+07	5.01684e+07	5.08868e+07	5.14694e+07	5.20591e+07	5.26559e+07	5.326e+07	5.38714e+07	5.42682e+07	5.46682e+07	5.50715e+07	5.54782e+07	5.58883e+07	8.33443e+08
Namibia	Yes	8.82437e+06	9.17223e+06	9.50751e+06	9.82528e+06	1.01185e+07	1.03806e+07	1.06368e+07	1.08995e+07	1.11691e+07	1.14457e+07	1.17294e+07	1.20319e+07	1.23425e+07	1.26613e+07	1.29886e+07	1.33246e+07	1.77058e+08
Nepal		4.20324e+07	4.29761e+07	4.39434e+07	4.49348e+07	4.59508e+07	4.69919e+07	4.78464e+07	4.87169e+07	4.96036e+07	5.05069e+07	5.14271e+07	5.21056e+07	5.27934e+07	5.34906e+07	5.41973e+07	5.49136e+07	7.82431e+08
Niger		1.03039e+07	1.07255e+07	1.11645e+07	1.16215e+07	1.20973e+07	1.25928e+07	1.31316e+07	1.36938e+07	1.42803e+07	1.48923e+07	1.55308e+07	1.62006e+07	1.68996e+07	1.7629e+07	1.83902e+07	1.91844e+07	2.28338e+08
Nigeria	Yes	1.94874e+08	2.01106e+08	2.07494e+08	2.14063e+08	2.20823e+08	2.27693e+08	2.33932e+08	2.40354e+08	2.46963e+08	2.53767e+08	2.60769e+08	2.67874e+08	2.75183e+08	2.82704e+08	2.90443e+08	2.98405e+08	3.91645e+09
Pakistan	Yes	6.13483e+07	6.27437e+07	6.42089e+07	6.5756e+07	6.74003e+07	6.91614e+07	7.11188e+07	7.32361e+07	7.5545e+07	7.80843e+07	8.09023e+07	8.40253e+07	8.75583e+07	9.15919e+07	9.62381e+07	1.01635e+08	1.23055e+09
Papua New Guinea		6.07601e+06	6.2293e+06	6.38654e+06	6.54773e+06	6.71301e+06	6.88245e+06	7.04333e+06	7.20798e+06	7.3765e+06	7.54898e+06	7.72551e+06	7.88774e+06	8.05339e+06	8.22254e+06	8.39527e+06	8.57166e+06	1.16868e+08
Peru		7.28534e+07	7.37034e+07	7.45645e+07	7.5437e+07	7.6321e+07	7.72168e+07	7.80938e+07	7.89816e+07	7.98806e+07	8.07909e+07	8.17125e+07	8.25392e+07	8.33755e+07	8.42215e+07	8.50774e+07	8.59433e+07	1.27071e+09
Philippines		8.65761e+07	8.80093e+07	8.94554e+07	9.09296e+07	9.24315e+07	9.39617e+07	9.54386e+07	9.69451e+07	9.84826e+07	1.00052e+08	1.01656e+08	1.03184e+08	1.04746e+08	1.06344e+08	1.0798e+08	1.09657e+08	1.56585e+09
Russian Federation	Yes	3.80559e+08	3.78929e+08	3.77233e+08	3.75471e+08	3.73648e+08	3.71779e+08	3.70106e+08	3.68453e+08	3.6682e+08	3.65206e+08	3.63611e+08	3.62861e+08	3.62121e+08	3.61391e+08	3.60672e+08	3.59963e+08	5.89882e+09
Rwanda		8.34017e+06	9.00232e+06	9.68844e+06	1.04009e+07	1.11388e+07	1.19037e+07	1.26948e+07	1.35186e+07	1.43764e+07	1.52696e+07	1.61995e+07	1.70837e+07	1.79972e+07	1.8941e+07	1.99161e+07	2.09233e+07	2.27394e+08
Sao Tome and Principe		233689	244930	256500	268430	280730	293446	306588	320197	334290	348882	363990	377974	392365	407172	422406	438081	5.28967e+06
Senegal		1.2362e+07	1.27479e+07	1.31461e+07	1.35572e+07	1.39821e+07	1.44212e+07	1.48816e+07	1.53572e+07	1.58485e+07	1.63559e+07	1.688e+07	1.74339e+07	1.80065e+07	1.85983e+07	1.921e+07	1.98424e+07	2.52631e+08
Solomon Islands		2.04983e+06	2.11412e+06	2.18042e+06	2.2488e+06	2.31932e+06	2.39206e+06	2.47077e+06	2.55208e+06	2.63606e+06	2.7228e+06	2.8124e+06	2.89215e+06	2.97417e+06	3.05852e+06	3.14527e+06	3.23449e+06	4.18033e+07
Sierra Leone		6.30277e+06	6.68338e+06	7.08016e+06	7.49321e+06	7.92296e+06	8.36986e+06	8.82427e+06	9.29703e+06	9.7888e+06	1.03002e+07	1.08321e+07	1.13534e+07	1.18938e+07	1.23975e+07	1.28985e+07	1.34166e+07	1.54855e+08
Somalia		9.13941e+06	1.0612e+07	1.21692e+07	1.38151e+07	1.55539e+07	1.73898e+07	1.93586e+07	2.14396e+07	2.3638e+07	2.59596e+07	2.84099e+07	3.09611e+07	3.36474e+07	3.64749e+07	3.94498e+07	4.25788e+07	3.80597e+08
South Africa	Yes	2.70592e+08	2.7311e+08	2.75412e+08	2.77668e+08	2.7988e+08	2.82057e+08	2.84666e+08	2.87299e+08	2.89956e+08	2.92639e+08	2.95346e+08	2.97777e+08	3.00228e+08	3.02699e+08	3.05191e+08	3.07703e+08	4.62222e+09
South Sudan	Yes	1.93766e+07	1.99657e+07	2.05708e+07	2.11938e+07	2.1836e+07	2.24982e+07	2.31382e+07	2.37965e+07	2.44738e+07	2.51706e+07	2.58874e+07	2.65713e+07	2.72733e+07	2.7994e+07	2.8734e+07	2.94937e+07	3.87974e+08
Sudan		9.60148e+06	9.88275e+06	1.01736e+07	1.04736e+07	1.07829e+07	1.11008e+07	1.14071e+07	1.1722e+07	1.20456e+07	1.23783e+07	1.27204e+07	1.30436e+07	1.33752e+07	1.37155e+07	1.40645e+07	1.44227e+07	1.9091e+08
Swaziland	Yes	5.31299e+06	5.39114e+06	5.46696e+06	5.54175e+06	5.61587e+06	5.68932e+06	5.76724e+06	5.84644e+06	5.92695e+06	6.00879e+06	6.09197e+06	6.17448e+06	6.25832e+06	6.3435e+06	6.43006e+06	6.518e+06	9.43838e+07
Tajikistan		2.4292e+07	2.46744e+07	2.50603e+07	2.54505e+07	2.58455e+07	2.62466e+07	2.67105e+07	2.71827e+07	2.76633e+07	2.81526e+07	2.86507e+07	2.92787e+07	2.99206e+07	3.05765e+07	3.1247e+07	3.19321e+07	4.42884e+08
Togo		1.21007e+07	1.2783e+07	1.34908e+07	1.42269e+07	1.49932e+07	1.57916e+07	1.66093e+07	1.7462e+07	1.83511e+07	1.92781e+07	2.02445e+07	2.11956e+07	2.21834e+07	2.32093e+07	2.42748e+07	2.53811e+07	2.91575e+08
Turkmenistan		1.63823e+07	1.65491e+07	1.67177e+07	1.6888e+07	1.706e+07	1.72339e+07	1.73848e+07	1.75371e+07	1.76909e+07	1.7846e+07	1.80026e+07	1.814e+07	1.82785e+07	1.84181e+07	1.85588e+07	1.87007e+07	2.81388e+08
Uganda	Yes	5.04407e+07	5.23606e+07	5.43346e+07	5.6368e+07	5.84594e+07	6.0609e+07	6.27642e+07	6.49969e+07	6.73097e+07	6.97056e+07	7.21877e+07	7.45929e+07	7.70787e+07	7.96479e+07	8.23034e+07	8.50479e+07	1.06821e+09
Ukraine	Yes	1.27844e+08	1.26237e+08	1.24668e+08	1.23151e+08	1.21629e+08	1.20107e+08	1.19229e+08	1.18358e+08	1.17494e+08	1.16637e+08	1.15787e+08	1.14861e+08	1.13943e+08	1.13033e+08	1.1213e+08	1.11236e+08	1.89634e+09
United Republic of Tanzania	Yes	1.00895e+08	1.03989e+08	1.07164e+08	1.10423e+08	1.1378e+08	1.17239e+08	1.20975e+08	1.24837e+08	1.28831e+08	1.32961e+08	1.37231e+08	1.41609e+08	1.46135e+08	1.50814e+08	1.55651e+08	1.60651e+08	2.05318e+09
United States of America	Yes	7.37162e+08	7.40157e+08	7.43148e+08	7.46133e+08	7.49112e+08	7.52083e+08	7.56018e+08	7.5998e+08	7.63969e+08	7.67984e+08	7.72027e+08	7.75947e+08	7.79891e+08	7.83862e+08	7.87859e+08	7.91882e+08	1.22072e+10
Uzbekistan		9.05692e+07	9.13793e+07	9.22029e+07	9.30401e+07	9.38902e+07	9.47528e+07	9.57634e+07	9.67858e+07	9.78199e+07	9.8866e+07	9.99241e+07	1.01048e+08	1.02186e+08	1.03337e+08	1.04502e+08	1.0568e+08	1.56175e+09
Viet Nam	Yes	7.07132e+07	7.11458e+07	7.15584e+07	7.19555e+07	7.23415e+07	7.27206e+07	7.32242e+07	7.37335e+07	7.42486e+07	7.47696e+07	7.52964e+07	7.58241e+07	7.63573e+07	7.68963e+07	7.7441e+07	7.79914e+07	1.18622e+09
Yemen		8.15481e+06	8.39193e+06	8.63609e+06	8.88743e+06	9.14609e+06	9.41231e+06	9.66779e+06	9.93036e+06	1.02002e+07	1.04776e+07	1.07626e+07	1.10304e+07	1.13051e+07	1.15869e+07	1.1876e+07	1.21727e+07	1.61638e+08
Zambia	Yes	2.85733e+07	2.98349e+07	3.11309e+07	3.24639e+07	3.38361e+07	3.52465e+07	3.6683e+07	3.81761e+07	3.97279e+07	4.13409e+07	4.30066e+07	4.45616e+07	4.61714e+07	4.78378e+07	4.95627e+07	5.13483e+07	6.29502e+08
Zimbabwe	Yes	2.50093e+07	2.55577e+07	2.61227e+07	2.67049e+07	2.73048e+07	2.79229e+07	2.85837e+07	2.9266e+07	2.99704e+07	3.06976e+07	3.14366e+07	3.20969e+07	3.2776e+07	3.34744e+07	3.41927e+07	3.49314e+07	4.76048e+08
Total		7.53233e+09	7.65345e+09	7.77832e+09	7.9073e+09	8.04049e+09	8.17756e+09	8.31728e+09	8.46095e+09	8.6095e+09	8.76335e+09	8.9227e+09	9.07839e+09	9.23951e+09	9.40625e+09	9.57902e+09	9.7582e+09	1.37225e+11
Total condoms requried, high scenario
Country	FastTrack?	2015	2016	2017	2018	2019	2020	2021	2022	2023	2024	2025	2026	2027	2028	2029	2030	Total, 2015-30
Afghanistan		9.69128e+06	2.6967e+07	2.7917e+07	2.89008e+07	2.99195e+07	3.09747e+07	3.19431e+07	3.2943e+07	3.39754e+07	3.50416e+07	3.61428e+07	3.70506e+07	3.79836e+07	3.89424e+07	3.99281e+07	4.09416e+07	5.19262e+08
Angola	Yes	3.81888e+07	1.09685e+08	1.13724e+08	1.1788e+08	1.22153e+08	1.26559e+08	1.31091e+08	1.35785e+08	1.40648e+08	1.45685e+08	1.50903e+08	1.56033e+08	1.61337e+08	1.66822e+08	1.72493e+08	1.78357e+08	2.16734e+09
Azerbaijan		8.69349e+06	2.4108e+07	2.41194e+07	2.41308e+07	2.41424e+07	2.41543e+07	2.41828e+07	2.42124e+07	2.42431e+07	2.42748e+07	2.43077e+07	2.46094e+07	2.49154e+07	2.52258e+07	2.55406e+07	2.586e+07	3.7672e+08
Bangladesh		5.49753e+07	1.13704e+08	1.15215e+08	1.16746e+08	1.18299e+08	1.19873e+08	1.21091e+08	1.22322e+08	1.23567e+08	1.24825e+08	1.26096e+08	1.26925e+08	1.2776e+08	1.28603e+08	1.29452e+08	1.30309e+08	1.89976e+09
Benin		1.71234e+07	6.1929e+07	6.37569e+07	6.5635e+07	6.75664e+07	6.9553e+07	7.1497e+07	7.3497e+07	7.55549e+07	7.76721e+07	7.98504e+07	8.18999e+07	8.40035e+07	8.61627e+07	8.83789e+07	9.06536e+07	1.15473e+09
Bolivia (Plurinational State of)		2.66301e+07	5.03384e+07	5.125e+07	5.21782e+07	5.31233e+07	5.40854e+07	5.49475e+07	5.58235e+07	5.67136e+07	5.7618e+07	5.8537e+07	5.93038e+07	6.0081e+07	6.08688e+07	6.16672e+07	6.24764e+07	8.75642e+08
Botswana	Yes	1.19977e+07	1.51515e+07	1.53648e+07	1.55744e+07	1.57834e+07	1.59883e+07	1.61722e+07	1.63587e+07	1.65477e+07	1.67394e+07	1.69338e+07	1.71126e+07	1.72937e+07	1.74771e+07	1.76629e+07	1.7851e+07	2.60009e+08
Brazil	Yes	7.66829e+08	1.03011e+09	1.0382e+09	1.04636e+09	1.05458e+09	1.06287e+09	1.06695e+09	1.07107e+09	1.07521e+09	1.07938e+09	1.08359e+09	1.08453e+09	1.0855e+09	1.08649e+09	1.0875e+09	1.08854e+09	1.68077e+10
Burkina Faso		3.4627e+07	8.86236e+07	9.15543e+07	9.45805e+07	9.77053e+07	1.00933e+08	1.04211e+08	1.07597e+08	1.11096e+08	1.14712e+08	1.18448e+08	1.21981e+08	1.25623e+08	1.29375e+08	1.33241e+08	1.37225e+08	1.71153e+09
Burundi		4.54156e+06	1.53337e+07	1.57259e+07	1.61334e+07	1.65528e+07	1.69833e+07	1.74942e+07	1.80231e+07	1.85706e+07	1.91374e+07	1.9724e+07	2.03393e+07	2.09763e+07	2.1636e+07	2.23191e+07	2.30264e+07	2.86517e+08
Cambodia		1.70724e+07	2.57198e+07	2.59667e+07	2.62239e+07	2.64929e+07	2.67718e+07	2.71132e+07	2.74633e+07	2.78222e+07	2.81898e+07	2.85664e+07	2.90008e+07	2.94458e+07	2.99015e+07	3.0368e+07	3.08454e+07	4.36964e+08
Cameroon	Yes	9.09954e+07	1.87415e+08	1.92583e+08	1.97901e+08	2.03375e+08	2.09007e+08	2.14589e+08	2.20326e+08	2.26225e+08	2.32289e+08	2.38523e+08	2.4449e+08	2.50612e+08	2.56894e+08	2.63341e+08	2.69955e+08	3.49852e+09
Central African Republic		1.27197e+07	2.50108e+07	2.55693e+07	2.615e+07	2.67523e+07	2.73745e+07	2.79353e+07	2.85081e+07	2.9093e+07	2.96903e+07	3.03004e+07	3.08908e+07	3.14932e+07	3.21077e+07	3.27346e+07	3.33741e+07	4.49704e+08
Chad	Yes	1.35196e+07	6.2086e+07	6.43119e+07	6.66311e+07	6.90387e+07	7.15309e+07	7.39692e+07	7.64936e+07	7.91072e+07	8.18132e+07	8.46148e+07	8.73414e+07	9.01585e+07	9.30691e+07	9.60765e+07	9.91837e+07	1.20895e+09
China	Yes	1.53718e+09	2.19536e+09	2.18889e+09	2.18265e+09	2.17663e+09	2.17081e+09	2.16921e+09	2.16778e+09	2.16651e+09	2.16541e+09	2.16449e+09	2.16792e+09	2.17143e+09	2.17503e+09	2.17872e+09	2.18251e+09	3.41605e+10
Comoros		1.04126e+06	2.5663e+06	2.63109e+06	2.69752e+06	2.76562e+06	2.83545e+06	2.9057e+06	2.9777e+06	3.05148e+06	3.12709e+06	3.20457e+06	3.27897e+06	3.3551e+06	3.43299e+06	3.5127e+06	3.59425e+06	4.69778e+07
Congo		1.67706e+07	4.22617e+07	4.34107e+07	4.45908e+07	4.58028e+07	4.70513e+07	4.84097e+07	4.98075e+07	5.12459e+07	5.2726e+07	5.4249e+07	5.57969e+07	5.73892e+07	5.90272e+07	6.07121e+07	6.24452e+07	7.91697e+08
Côte d'Ivoire	Yes	7.37663e+07	1.79315e+08	1.83826e+08	1.88452e+08	1.93188e+08	1.98034e+08	2.02733e+08	2.07549e+08	2.12486e+08	2.17546e+08	2.22733e+08	2.28146e+08	2.33698e+08	2.39391e+08	2.45229e+08	2.51215e+08	3.27731e+09
Democratic People's Republic of Korea		2.43476e+07	3.33417e+07	3.33809e+07	3.34214e+07	3.34632e+07	3.35061e+07	3.34897e+07	3.34747e+07	3.34609e+07	3.34484e+07	3.34373e+07	3.35642e+07	3.36917e+07	3.38197e+07	3.39481e+07	3.40771e+07	5.27873e+08
Democratic Republic of the Congo	Yes	6.41714e+08	1.20519e+09	1.24718e+09	1.29065e+09	1.33565e+09	1.38222e+09	1.43071e+09	1.48091e+09	1.53288e+09	1.58667e+09	1.64236e+09	1.69781e+09	1.75514e+09	1.8144e+09	1.87568e+09	1.93903e+09	2.38582e+10
Djibouti		1.29305e+06	4.91896e+06	4.98584e+06	5.05392e+06	5.1233e+06	5.1939e+06	5.26142e+06	5.32985e+06	5.39919e+06	5.46947e+06	5.5407e+06	5.59898e+06	5.65793e+06	5.71757e+06	5.77789e+06	5.83891e+06	8.21609e+07
Egypt		1.73689e+07	7.01053e+07	7.12993e+07	7.25145e+07	7.37502e+07	7.50061e+07	7.63141e+07	7.76473e+07	7.90063e+07	8.03918e+07	8.18046e+07	8.34731e+07	8.5179e+07	8.69232e+07	8.8707e+07	9.05317e+07	1.21002e+09
Equatorial Guinea		1.10018e+06	3.7432e+06	3.82108e+06	3.89971e+06	3.98038e+06	4.06376e+06	4.15849e+06	4.25626e+06	4.35714e+06	4.46122e+06	4.56861e+06	4.68127e+06	4.79754e+06	4.91753e+06	5.04135e+06	5.1691e+06	6.70168e+07
Eritrea		6.8363e+06	2.47158e+07	2.54955e+07	2.63009e+07	2.71324e+07	2.79905e+07	2.88941e+07	2.98272e+07	3.07909e+07	3.1786e+07	3.28136e+07	3.36622e+07	3.45331e+07	3.54268e+07	3.63439e+07	3.72851e+07	4.69834e+08
Ethiopia	Yes	3.26925e+07	1.21871e+08	1.25637e+08	1.29522e+08	1.3351e+08	1.37607e+08	1.41183e+08	1.44856e+08	1.48631e+08	1.52509e+08	1.56494e+08	1.60173e+08	1.63941e+08	1.67802e+08	1.71758e+08	1.75812e+08	2.264e+09
Gabon		8.28325e+06	1.48324e+07	1.51477e+07	1.54703e+07	1.58003e+07	1.61378e+07	1.64749e+07	1.68197e+07	1.71726e+07	1.75336e+07	1.79029e+07	1.82677e+07	1.86407e+07	1.9022e+07	1.94118e+07	1.98103e+07	2.66728e+08
Gambia		1.67692e+06	5.12727e+06	5.29513e+06	5.46892e+06	5.64835e+06	5.83203e+06	6.02741e+06	6.22956e+06	6.43871e+06	6.65511e+06	6.87902e+06	7.10292e+06	7.33432e+06	7.57347e+06	7.82064e+06	8.07609e+06	9.91859e+07
Ghana	Yes	4.4653e+07	1.20626e+08	1.23314e+08	1.26072e+08	1.28883e+08	1.31752e+08	1.34676e+08	1.37671e+08	1.40738e+08	1.43878e+08	1.47093e+08	1.50427e+08	1.53843e+08	1.5734e+08	1.60923e+08	1.64592e+08	2.16648e+09
Guatemala		5.05215e+07	6.93268e+07	7.11825e+07	7.30925e+07	7.5056e+07	7.70733e+07	7.88378e+07	8.06428e+07	8.24893e+07	8.4378e+07	8.63102e+07	8.80363e+07	8.97972e+07	9.15937e+07	9.34263e+07	9.52959e+07	1.28706e+09
Guinea		1.73026e+07	6.08958e+07	6.2798e+07	6.47497e+07	6.67476e+07	6.87931e+07	7.08222e+07	7.29113e+07	7.50624e+07	7.72773e+07	7.95577e+07	8.18097e+07	8.41256e+07	8.65073e+07	8.89567e+07	9.14757e+07	1.14979e+09
Guinea-Bissau		4.90897e+06	9.75859e+06	9.99894e+06	1.02466e+07	1.05015e+07	1.0762e+07	1.10218e+07	1.12881e+07	1.15609e+07	1.18404e+07	1.21268e+07	1.2411e+07	1.2702e+07	1.3e+07	1.3305e+07	1.36174e+07	1.7905e+08
Haiti	Yes	5.7177e+07	9.51114e+07	9.66021e+07	9.81109e+07	9.96387e+07	1.01185e+08	1.02674e+08	1.04184e+08	1.05717e+08	1.07273e+08	1.08851e+08	1.10046e+08	1.11254e+08	1.12476e+08	1.13712e+08	1.14962e+08	1.63898e+09
India	Yes	3.37764e+08	7.71805e+08	7.81826e+08	7.92154e+08	8.02777e+08	8.13696e+08	8.23128e+08	8.32672e+08	8.42332e+08	8.52107e+08	8.61999e+08	8.69311e+08	8.76689e+08	8.84135e+08	8.91649e+08	8.99232e+08	1.29333e+10
Indonesia	Yes	1.42094e+08	3.26565e+08	3.30468e+08	3.34235e+08	3.37873e+08	3.41396e+08	3.44168e+08	3.46966e+08	3.49792e+08	3.52647e+08	3.55529e+08	3.58527e+08	3.61554e+08	3.64611e+08	3.67696e+08	3.70812e+08	5.38493e+09
Iran (Islamic Republic of)	Yes	4.86155e+07	1.15852e+08	1.16672e+08	1.17498e+08	1.18332e+08	1.19172e+08	1.20338e+08	1.21519e+08	1.22717e+08	1.2393e+08	1.25161e+08	1.26222e+08	1.27299e+08	1.28391e+08	1.295e+08	1.30625e+08	1.89184e+09
Iraq		3.68236e+07	6.2366e+07	6.42135e+07	6.61157e+07	6.80743e+07	7.0091e+07	7.21634e+07	7.42973e+07	7.64945e+07	7.87569e+07	8.10864e+07	8.3442e+07	8.58662e+07	8.83611e+07	9.09288e+07	9.35713e+07	1.19265e+09
Jamaica	Yes	2.01671e+07	2.61596e+07	2.6142e+07	2.61237e+07	2.61053e+07	2.6087e+07	2.60416e+07	2.59966e+07	2.5952e+07	2.59077e+07	2.58638e+07	2.57947e+07	2.57259e+07	2.56575e+07	2.55894e+07	2.55217e+07	4.08836e+08
Kenya	Yes	1.05064e+08	2.17479e+08	2.24073e+08	2.30804e+08	2.37703e+08	2.44783e+08	2.51761e+08	2.58939e+08	2.66323e+08	2.73916e+08	2.81727e+08	2.8896e+08	2.9638e+08	3.03992e+08	3.11802e+08	3.19815e+08	4.11352e+09
Kyrgyzstan		1.55498e+07	1.99142e+07	2.00408e+07	2.0168e+07	2.02954e+07	2.0423e+07	2.06652e+07	2.09104e+07	2.11587e+07	2.14102e+07	2.1665e+07	2.20897e+07	2.25228e+07	2.29645e+07	2.3415e+07	2.38743e+07	3.37067e+08
Lao People's Democratic Republic		5.71066e+06	9.42606e+06	9.62319e+06	9.8231e+06	1.00258e+07	1.02315e+07	1.04428e+07	1.06584e+07	1.08785e+07	1.11032e+07	1.13325e+07	1.15463e+07	1.17641e+07	1.19861e+07	1.22122e+07	1.24427e+07	1.69207e+08
Lesotho	Yes	1.15747e+07	1.95187e+07	1.98661e+07	2.02145e+07	2.0564e+07	2.0914e+07	2.12128e+07	2.15161e+07	2.18239e+07	2.21362e+07	2.24532e+07	2.27694e+07	2.30903e+07	2.34159e+07	2.37464e+07	2.40818e+07	3.38898e+08
Liberia		5.56747e+06	2.08205e+07	2.14398e+07	2.20816e+07	2.27453e+07	2.34311e+07	2.409e+07	2.47679e+07	2.54652e+07	2.61825e+07	2.69205e+07	2.7599e+07	2.82949e+07	2.90087e+07	2.97408e+07	3.04917e+07	3.88647e+08
Madagascar		2.23166e+07	1.14692e+08	1.18235e+08	1.2189e+08	1.25659e+08	1.29547e+08	1.33234e+08	1.37027e+08	1.40928e+08	1.44942e+08	1.4907e+08	1.53153e+08	1.57348e+08	1.61659e+08	1.66088e+08	1.7064e+08	2.14643e+09
Malawi	Yes	1.89355e+07	6.31109e+07	6.47586e+07	6.64536e+07	6.82016e+07	7.00059e+07	7.18232e+07	7.37031e+07	7.56478e+07	7.76596e+07	7.97408e+07	8.17508e+07	8.38255e+07	8.5967e+07	8.81776e+07	9.04595e+07	1.16022e+09
Mali	Yes	1.26908e+07	5.81655e+07	6.01522e+07	6.22063e+07	6.43257e+07	6.6511e+07	6.88584e+07	7.12892e+07	7.38065e+07	7.64133e+07	7.91129e+07	8.17699e+07	8.45166e+07	8.73561e+07	9.02916e+07	9.33262e+07	1.13079e+09
Mauritania		4.18785e+06	1.69854e+07	1.74171e+07	1.78591e+07	1.83117e+07	1.87755e+07	1.92281e+07	1.96917e+07	2.01666e+07	2.06532e+07	2.11517e+07	2.16269e+07	2.21129e+07	2.261e+07	2.31184e+07	2.36384e+07	3.07535e+08
Mexico		4.38758e+08	5.80395e+08	5.87298e+08	5.9428e+08	6.01343e+08	6.08489e+08	6.13896e+08	6.1936e+08	6.2488e+08	6.30457e+08	6.36092e+08	6.40732e+08	6.45415e+08	6.50139e+08	6.54907e+08	6.59717e+08	9.78616e+09
Morocco		1.63494e+07	4.28318e+07	4.32759e+07	4.37244e+07	4.41783e+07	4.46342e+07	4.51243e+07	4.56201e+07	4.61218e+07	4.66293e+07	4.71428e+07	4.76736e+07	4.82108e+07	4.87545e+07	4.93048e+07	4.98618e+07	7.09438e+08
Mozambique	Yes	9.76343e+07	2.69919e+08	2.78359e+08	2.87095e+08	2.9614e+08	3.05503e+08	3.14922e+08	3.24663e+08	3.34738e+08	3.45157e+08	3.55933e+08	3.6632e+08	3.77038e+08	3.88098e+08	3.9951e+08	4.11285e+08	5.15231e+09
Myanmar	Yes	4.73984e+07	7.56426e+07	7.66079e+07	7.75868e+07	7.85795e+07	7.95861e+07	8.03517e+07	8.11259e+07	8.19087e+07	8.27002e+07	8.35004e+07	8.39629e+07	8.4429e+07	8.48986e+07	8.53718e+07	8.58487e+07	1.2695e+09
Namibia	Yes	8.82437e+06	1.15737e+07	1.1995e+07	1.23946e+07	1.27636e+07	1.30939e+07	1.34168e+07	1.3748e+07	1.40878e+07	1.44363e+07	1.47939e+07	1.51752e+07	1.55667e+07	1.59685e+07	1.63811e+07	1.68046e+07	2.21024e+08
Nepal		4.20324e+07	6.3041e+07	6.44587e+07	6.59165e+07	6.74148e+07	6.89543e+07	7.01714e+07	7.14115e+07	7.2675e+07	7.39623e+07	7.52738e+07	7.62216e+07	7.71823e+07	7.81561e+07	7.91432e+07	8.01438e+07	1.12616e+09
Niger		1.03039e+07	6.24537e+07	6.51107e+07	6.78816e+07	7.07731e+07	7.3792e+07	7.7038e+07	8.04334e+07	8.39848e+07	8.76991e+07	9.15835e+07	9.56303e+07	9.98613e+07	1.04285e+08	1.08909e+08	1.13743e+08	1.29348e+09
Nigeria	Yes	1.94874e+08	7.03444e+08	7.21961e+08	7.40875e+08	7.60216e+08	7.79997e+08	8.00256e+08	8.21089e+08	8.42514e+08	8.64546e+08	8.87203e+08	9.10052e+08	9.33536e+08	9.57674e+08	9.82484e+08	1.00798e+09	1.29087e+10
Pakistan	Yes	6.13483e+07	2.15025e+08	2.20142e+08	2.25571e+08	2.3137e+08	2.37618e+08	2.44577e+08	2.52152e+08	2.60469e+08	2.69681e+08	2.7998e+08	2.91475e+08	3.04577e+08	3.19643e+08	3.37118e+08	3.57551e+08	4.1083e+09
Papua New Guinea		6.07601e+06	1.13046e+07	1.15874e+07	1.18773e+07	1.21745e+07	1.24791e+07	1.27617e+07	1.30508e+07	1.33465e+07	1.3649e+07	1.39584e+07	1.42455e+07	1.45386e+07	1.48379e+07	1.51434e+07	1.54553e+07	2.06486e+08
Peru		7.28534e+07	1.61281e+08	1.63069e+08	1.64879e+08	1.66713e+08	1.68572e+08	1.70329e+08	1.72107e+08	1.73906e+08	1.75725e+08	1.77566e+08	1.79176e+08	1.80804e+08	1.82449e+08	1.84112e+08	1.85792e+08	2.67933e+09
Philippines		8.65761e+07	2.40354e+08	2.44202e+08	2.48129e+08	2.52133e+08	2.56216e+08	2.60136e+08	2.64142e+08	2.68239e+08	2.72431e+08	2.76726e+08	2.80853e+08	2.85087e+08	2.89436e+08	2.93908e+08	2.98513e+08	4.11708e+09
Russian Federation	Yes	3.80559e+08	4.86615e+08	4.84385e+08	4.82073e+08	4.79688e+08	4.77245e+08	4.75132e+08	4.73043e+08	4.70979e+08	4.68939e+08	4.66923e+08	4.65963e+08	4.65017e+08	4.64083e+08	4.63163e+08	4.62256e+08	7.46606e+09
Rwanda		8.34017e+06	2.10109e+07	2.16046e+07	2.22036e+07	2.28053e+07	2.34137e+07	2.40258e+07	2.46561e+07	2.53052e+07	2.59736e+07	2.66619e+07	2.72357e+07	2.78231e+07	2.84243e+07	2.90399e+07	2.96701e+07	3.88194e+08
Sao Tome and Principe		233689	640328	655618	671160	686964	703129	719674	736669	754127	772057	790472	805934	821750	837927	854471	871391	1.15554e+07
Senegal		1.2362e+07	3.65011e+07	3.76318e+07	3.87995e+07	4.00073e+07	4.12568e+07	4.25433e+07	4.38719e+07	4.52438e+07	4.66606e+07	4.81236e+07	4.96589e+07	5.12451e+07	5.28838e+07	5.45768e+07	5.63259e+07	6.97692e+08
Solomon Islands		2.04983e+06	5.89417e+06	6.08024e+06	6.27218e+06	6.47019e+06	6.67445e+06	6.89365e+06	7.12005e+06	7.35389e+06	7.59541e+06	7.84486e+06	8.06202e+06	8.28522e+06	8.51462e+06	8.75041e+06	8.99275e+06	1.12854e+08
Sierra Leone		6.30277e+06	4.43546e+07	4.55549e+07	4.67866e+07	4.80494e+07	4.93431e+07	5.05962e+07	5.18816e+07	5.32002e+07	5.4553e+07	5.59407e+07	5.71865e+07	5.84604e+07	5.97632e+07	6.10954e+07	6.24578e+07	8.05526e+08
Somalia		9.13941e+06	4.49842e+07	4.64047e+07	4.78721e+07	4.93879e+07	5.09533e+07	5.26529e+07	5.44093e+07	5.62243e+07	5.80999e+07	6.00382e+07	6.19732e+07	6.39705e+07	6.60324e+07	6.81607e+07	7.03577e+07	8.6066e+08
South Africa	Yes	2.70592e+08	3.43159e+08	3.46056e+08	3.48897e+08	3.51684e+08	3.54425e+08	3.57712e+08	3.61029e+08	3.64377e+08	3.67756e+08	3.71167e+08	3.74227e+08	3.77312e+08	3.80423e+08	3.8356e+08	3.86723e+08	5.7391e+09
South Sudan	Yes	1.93766e+07	6.22892e+07	6.41592e+07	6.60829e+07	6.80663e+07	7.01117e+07	7.20714e+07	7.40868e+07	7.61594e+07	7.82909e+07	8.04829e+07	8.25656e+07	8.47028e+07	8.68961e+07	8.91468e+07	9.14565e+07	1.16595e+09
Sudan		9.60148e+06	4.42734e+07	4.55767e+07	4.69211e+07	4.83073e+07	4.97318e+07	5.11021e+07	5.25108e+07	5.39587e+07	5.54472e+07	5.69772e+07	5.84226e+07	5.99055e+07	6.14269e+07	6.29878e+07	6.45893e+07	8.2174e+08
Swaziland	Yes	5.31299e+06	8.07298e+06	8.1862e+06	8.29762e+06	8.40783e+06	8.51684e+06	8.63226e+06	8.74959e+06	8.86886e+06	8.99012e+06	9.11338e+06	9.23508e+06	9.35874e+06	9.48438e+06	9.61204e+06	9.74176e+06	1.38581e+08
Tajikistan		2.4292e+07	3.09741e+07	3.1459e+07	3.19492e+07	3.24456e+07	3.29497e+07	3.35326e+07	3.4126e+07	3.473e+07	3.53449e+07	3.59709e+07	3.67596e+07	3.75657e+07	3.83896e+07	3.92316e+07	4.00921e+07	5.49813e+08
Togo		1.21007e+07	3.47249e+07	3.56214e+07	3.65423e+07	3.74907e+07	3.84694e+07	3.94412e+07	4.04477e+07	4.14898e+07	4.25682e+07	4.36839e+07	4.47149e+07	4.57781e+07	4.68741e+07	4.80037e+07	4.91674e+07	6.37118e+08
Turkmenistan		1.63823e+07	2.02797e+07	2.04853e+07	2.0693e+07	2.09029e+07	2.1115e+07	2.12986e+07	2.14839e+07	2.16709e+07	2.18596e+07	2.20501e+07	2.22171e+07	2.23855e+07	2.25552e+07	2.27263e+07	2.28988e+07	3.41004e+08
Uganda	Yes	5.04407e+07	2.1341e+08	2.21448e+08	2.2972e+08	2.38213e+08	2.4693e+08	2.55617e+08	2.64613e+08	2.73929e+08	2.83577e+08	2.93568e+08	3.03221e+08	3.13193e+08	3.23495e+08	3.34138e+08	3.45134e+08	4.19064e+09
Ukraine	Yes	1.27844e+08	2.03703e+08	2.012e+08	1.98789e+08	1.96362e+08	1.9393e+08	1.92388e+08	1.9086e+08	1.89344e+08	1.87842e+08	1.86353e+08	1.84744e+08	1.83151e+08	1.81572e+08	1.80008e+08	1.78458e+08	2.97655e+09
United Republic of Tanzania	Yes	1.00895e+08	3.301e+08	3.40055e+08	3.50264e+08	3.60775e+08	3.71601e+08	3.83208e+08	3.95208e+08	4.07614e+08	4.20439e+08	4.337e+08	4.4728e+08	4.61317e+08	4.75824e+08	4.90819e+08	5.06317e+08	6.27542e+09
United States of America	Yes	7.37162e+08	1.07831e+09	1.08267e+09	1.08702e+09	1.09136e+09	1.09569e+09	1.10152e+09	1.10739e+09	1.11329e+09	1.11924e+09	1.12523e+09	1.13091e+09	1.13664e+09	1.1424e+09	1.1482e+09	1.15403e+09	1.74511e+10
Uzbekistan		9.05692e+07	1.11043e+08	1.12038e+08	1.13049e+08	1.14075e+08	1.15117e+08	1.16335e+08	1.17566e+08	1.18811e+08	1.20071e+08	1.21345e+08	1.22702e+08	1.24074e+08	1.25463e+08	1.26868e+08	1.2829e+08	1.87742e+09
Viet Nam	Yes	7.07132e+07	1.16634e+08	1.17179e+08	1.17684e+08	1.18161e+08	1.18619e+08	1.19253e+08	1.19894e+08	1.20543e+08	1.212e+08	1.21864e+08	1.22546e+08	1.23236e+08	1.23933e+08	1.24637e+08	1.25349e+08	1.88144e+09
Yemen		8.15481e+06	2.93968e+07	3.02564e+07	3.11413e+07	3.20522e+07	3.29898e+07	3.3885e+07	3.48051e+07	3.57509e+07	3.67229e+07	3.77222e+07	3.86542e+07	3.96103e+07	4.05911e+07	4.15974e+07	4.26298e+07	5.4596e+08
Zambia	Yes	2.85733e+07	8.51271e+07	8.78494e+07	9.06109e+07	9.34164e+07	9.62603e+07	9.90968e+07	1.02021e+08	1.05035e+08	1.08142e+08	1.11345e+08	1.14448e+08	1.1764e+08	1.20924e+08	1.24303e+08	1.2778e+08	1.61257e+09
Zimbabwe	Yes	2.50093e+07	6.62505e+07	6.74068e+07	6.85929e+07	6.98095e+07	7.10576e+07	7.23843e+07	7.37465e+07	7.51451e+07	7.65811e+07	7.80556e+07	7.95342e+07	8.10515e+07	8.26085e+07	8.42062e+07	8.58457e+07	1.15729e+09
Total		7.53233e+09	1.37931e+10	1.39971e+10	1.42068e+10	1.44222e+10	1.46436e+10	1.48672e+10	1.50977e+10	1.53355e+10	1.5581e+10	1.58345e+10	1.60829e+10	1.63395e+10	1.66048e+10	1.68796e+10	1.71646e+10	2.38382e+11

## Sheet: Unit Cost Assumption
G. Unit Cost Assumptions
Cost per condom distributed, US$ 2015
	Family Planning		HIV Risk Group
Country	FP Clinical	FP SM	SW	MSM	TG	PR	MP	SDC
Afghanistan	0.052	0.177792	0.177792	0.177792	0.177792	0.177792	0.177792	0.177792
Albania	0.078	0.177792	0.177792	0.177792	0.177792	0.177792	0.177792	0.177792
Algeria	0.078	0.177792	0.177792	0.177792	0.177792	0.177792	0.177792	0.177792
Angola	0.078	0.711167	0.711167	0.711167	0.711167	0.711167	0.711167	0.711167
Argentina	0.078	0.177792	0.177792	0.177792	0.177792	0.177792	0.177792	0.177792
Armenia	0.0647778	0.177792	0.177792	0.177792	0.177792	0.177792	0.177792	0.177792
Azerbaijan	0.0647778	0.177792	0.177792	0.177792	0.177792	0.177792	0.177792	0.177792
Bangladesh	0.0464444	0.177792	0.177792	0.177792	0.177792	0.177792	0.177792	0.177792
Barbados	0.078	0.177792	0.177792	0.177792	0.177792	0.177792	0.177792	0.177792
Belarus	0.078	0.177792	0.177792	0.177792	0.177792	0.177792	0.177792	0.177792
Belize	0.078	1.34455	1.34455	1.34455	1.34455	1.34455	1.34455	1.34455
Benin	0.078	0.377808	0.377808	0.377808	0.377808	0.377808	0.377808	0.377808
Bhutan	0.0464444	0.177792	0.177792	0.177792	0.177792	0.177792	0.177792	0.177792
Bolivia (Plurinational State of)	0.078	0.177792	0.177792	0.177792	0.177792	0.177792	0.177792	0.177792
Bosnia and Herzegovina	0.078	0.177792	0.177792	0.177792	0.177792	0.177792	0.177792	0.177792
Botswana	0.078	0.50004	0.50004	0.50004	0.50004	0.50004	0.50004	0.50004
Brazil	0.078	0.177792	0.177792	0.177792	0.177792	0.177792	0.177792	0.177792
Bulgaria	0.078	0.177792	0.177792	0.177792	0.177792	0.177792	0.177792	0.177792
Burkina Faso	0.078	0.177792	0.177792	0.177792	0.177792	0.177792	0.177792	0.177792
Burundi	0.078	0.700055	0.700055	0.700055	0.700055	0.700055	0.700055	0.700055
Cambodia	0.0464444	0.155568	0.155568	0.155568	0.155568	0.155568	0.155568	0.155568
Cameroon	0.078	0.16668	0.16668	0.16668	0.16668	0.16668	0.16668	0.16668
Central African Republic	0.078	0.644495	0.644495	0.644495	0.644495	0.644495	0.644495	0.644495
Chad	0.078	0.177792	0.177792	0.177792	0.177792	0.177792	0.177792	0.177792
China	0.078	0.811175	0.811175	0.811175	0.811175	0.811175	0.811175	0.811175
Colombia	0.078	0.177792	0.177792	0.177792	0.177792	0.177792	0.177792	0.177792
Comoros	0.078	0.177792	0.177792	0.177792	0.177792	0.177792	0.177792	0.177792
Congo	0.078	0.16668	0.16668	0.16668	0.16668	0.16668	0.16668	0.16668
Costa Rica	0.078	0.688943	0.688943	0.688943	0.688943	0.688943	0.688943	0.688943
Côte d'Ivoire	0.078	0.877847	0.877847	0.877847	0.877847	0.877847	0.877847	0.877847
Cuba	0.078	0.177792	0.177792	0.177792	0.177792	0.177792	0.177792	0.177792
Democratic People's Republic of Korea	0.0464444	0.177792	0.177792	0.177792	0.177792	0.177792	0.177792	0.177792
Democratic Republic of the Congo	0.078	0.177792	0.177792	0.177792	0.177792	0.177792	0.177792	0.177792
Djibouti	0.078	0.177792	0.177792	0.177792	0.177792	0.177792	0.177792	0.177792
Dominican Republic	0.078	0.0666719	0.0666719	0.0666719	0.0666719	0.0666719	0.0666719	0.0666719
Ecuador	0.078	0.177792	0.177792	0.177792	0.177792	0.177792	0.177792	0.177792
Egypt	0.078	0.177792	0.177792	0.177792	0.177792	0.177792	0.177792	0.177792
Equatorial Guinea	0.078	0.177792	0.177792	0.177792	0.177792	0.177792	0.177792	0.177792
El Salvador	0.078	0.866735	0.866735	0.866735	0.866735	0.866735	0.866735	0.866735
Eritrea	0.078	0.177792	0.177792	0.177792	0.177792	0.177792	0.177792	0.177792
Ethiopia	0.078	0.177792	0.177792	0.177792	0.177792	0.177792	0.177792	0.177792
Fiji	0.078	0.177792	0.177792	0.177792	0.177792	0.177792	0.177792	0.177792
Gabon	0.078	0.177792	0.177792	0.177792	0.177792	0.177792	0.177792	0.177792
Gambia	0.078	0.177792	0.177792	0.177792	0.177792	0.177792	0.177792	0.177792
Georgia	0.0647778	0.177792	0.177792	0.177792	0.177792	0.177792	0.177792	0.177792
Ghana	0.078	0.177792	0.177792	0.177792	0.177792	0.177792	0.177792	0.177792
Guatemala	0.078	0.155568	0.155568	0.155568	0.155568	0.155568	0.155568	0.155568
Guinea	0.078	0.422256	0.422256	0.422256	0.422256	0.422256	0.422256	0.422256
Guinea-Bissau	0.078	0.177792	0.177792	0.177792	0.177792	0.177792	0.177792	0.177792
Guyana	0.078	0.177792	0.177792	0.177792	0.177792	0.177792	0.177792	0.177792
Haiti	0.0547778	0.422256	0.422256	0.422256	0.422256	0.422256	0.422256	0.422256
Honduras	0.078	0.355584	0.355584	0.355584	0.355584	0.355584	0.355584	0.355584
Hungary	0.078	0.177792	0.177792	0.177792	0.177792	0.177792	0.177792	0.177792
India	0.0464444	0.044448	0.044448	0.044448	0.044448	0.044448	0.044448	0.044448
Indonesia	0.0464444	0.177792	0.177792	0.177792	0.177792	0.177792	0.177792	0.177792
Iran (Islamic Republic of)	0.078	0.177792	0.177792	0.177792	0.177792	0.177792	0.177792	0.177792
Iraq	0.078	0.177792	0.177792	0.177792	0.177792	0.177792	0.177792	0.177792
Jamaica	0.078	0.177792	0.177792	0.177792	0.177792	0.177792	0.177792	0.177792
Jordan	0.078	0.177792	0.177792	0.177792	0.177792	0.177792	0.177792	0.177792
Kazakhstan	0.078	0.466704	0.466704	0.466704	0.466704	0.466704	0.466704	0.466704
Kenya	0.078	0.266688	0.266688	0.266688	0.266688	0.266688	0.266688	0.266688
Kyrgyzstan	0.0647778	0.133344	0.133344	0.133344	0.133344	0.133344	0.133344	0.133344
Lao People's Democratic Republic	0.0464444	0.16668	0.16668	0.16668	0.16668	0.16668	0.16668	0.16668
Lebanon	0.078	0.177792	0.177792	0.177792	0.177792	0.177792	0.177792	0.177792
Lesotho	0.078	0.400032	0.400032	0.400032	0.400032	0.400032	0.400032	0.400032
Liberia	0.078	0.355584	0.355584	0.355584	0.355584	0.355584	0.355584	0.355584
Libyan Arab Jamahiriya	0.078	0.177792	0.177792	0.177792	0.177792	0.177792	0.177792	0.177792
Madagascar	0.078	0.133344	0.133344	0.133344	0.133344	0.133344	0.133344	0.133344
Malawi	0.078	0.633383	0.633383	0.633383	0.633383	0.633383	0.633383	0.633383
Malaysia	0.078	0.177792	0.177792	0.177792	0.177792	0.177792	0.177792	0.177792
Maldives	0.078	0.177792	0.177792	0.177792	0.177792	0.177792	0.177792	0.177792
Mali	0.078	0.177792	0.177792	0.177792	0.177792	0.177792	0.177792	0.177792
Mauritania	0.078	0.177792	0.177792	0.177792	0.177792	0.177792	0.177792	0.177792
Mauritius	0.078	0.177792	0.177792	0.177792	0.177792	0.177792	0.177792	0.177792
Mexico	0.078	0.355584	0.355584	0.355584	0.355584	0.355584	0.355584	0.355584
Mongolia	0.052	0.177792	0.177792	0.177792	0.177792	0.177792	0.177792	0.177792
Morocco	0.078	0.177792	0.177792	0.177792	0.177792	0.177792	0.177792	0.177792
Mozambique	0.078	0.22224	0.22224	0.22224	0.22224	0.22224	0.22224	0.22224
Myanmar	0.0464444	0.133344	0.133344	0.133344	0.133344	0.133344	0.133344	0.133344
Namibia	0.078	0.177792	0.177792	0.177792	0.177792	0.177792	0.177792	0.177792
Nepal	0.0464444	0.177792	0.177792	0.177792	0.177792	0.177792	0.177792	0.177792
Nicaragua	0.0547778	0.22224	0.22224	0.22224	0.22224	0.22224	0.22224	0.22224
Niger	0.078	0.177792	0.177792	0.177792	0.177792	0.177792	0.177792	0.177792
Nigeria	0.078	0.16668	0.16668	0.16668	0.16668	0.16668	0.16668	0.16668
Pakistan	0.0647778	0.122232	0.122232	0.122232	0.122232	0.122232	0.122232	0.122232
Panama	0.078	0.400032	0.400032	0.400032	0.400032	0.400032	0.400032	0.400032
Papua New Guinea	0.052	3.43361	3.43361	3.43361	3.43361	3.43361	3.43361	3.43361
Paraguay	0.078	0.133344	0.133344	0.133344	0.133344	0.133344	0.133344	0.133344
Peru	0.078	0.177792	0.177792	0.177792	0.177792	0.177792	0.177792	0.177792
Philippines	0.078	0.177792	0.177792	0.177792	0.177792	0.177792	0.177792	0.177792
Republic of Moldova	0.0647778	0.177792	0.177792	0.177792	0.177792	0.177792	0.177792	0.177792
Romania	0.078	1.0223	1.0223	1.0223	1.0223	1.0223	1.0223	1.0223
Russian Federation	0.078	0.177792	0.177792	0.177792	0.177792	0.177792	0.177792	0.177792
Rwanda	0.078	0.16668	0.16668	0.16668	0.16668	0.16668	0.16668	0.16668
Sao Tome and Principe	0.078	0.177792	0.177792	0.177792	0.177792	0.177792	0.177792	0.177792
Senegal	0.078	0.177792	0.177792	0.177792	0.177792	0.177792	0.177792	0.177792
Serbia	0.078	0.177792	0.177792	0.177792	0.177792	0.177792	0.177792	0.177792
Solomon Islands	0.052	0.177792	0.177792	0.177792	0.177792	0.177792	0.177792	0.177792
Sierra Leone	0.078	0.177792	0.177792	0.177792	0.177792	0.177792	0.177792	0.177792
Somalia	0.078	0.177792	0.177792	0.177792	0.177792	0.177792	0.177792	0.177792
South Africa	0.078	0.122232	0.122232	0.122232	0.122232	0.122232	0.122232	0.122232
South Sudan	0.078	0.177792	0.177792	0.177792	0.177792	0.177792	0.177792	0.177792
Sri Lanka	0.078	0.177792	0.177792	0.177792	0.177792	0.177792	0.177792	0.177792
Sudan	0.078	0.644495	0.644495	0.644495	0.644495	0.644495	0.644495	0.644495
Suriname	0.078	0.177792	0.177792	0.177792	0.177792	0.177792	0.177792	0.177792
Swaziland	0.078	0.900071	0.900071	0.900071	0.900071	0.900071	0.900071	0.900071
Syrian Arab Republic	0.078	0.177792	0.177792	0.177792	0.177792	0.177792	0.177792	0.177792
Tajikistan	0.0647778	0.155568	0.155568	0.155568	0.155568	0.155568	0.155568	0.155568
TFYR Macedonia	0.078	0.177792	0.177792	0.177792	0.177792	0.177792	0.177792	0.177792
Thailand	0.078	1.62235	1.62235	1.62235	1.62235	1.62235	1.62235	1.62235
Timor-Leste	0.078	0.177792	0.177792	0.177792	0.177792	0.177792	0.177792	0.177792
Togo	0.078	0.255576	0.255576	0.255576	0.255576	0.255576	0.255576	0.255576
Tunisia	0.078	0.177792	0.177792	0.177792	0.177792	0.177792	0.177792	0.177792
Turkey	0.078	0.177792	0.177792	0.177792	0.177792	0.177792	0.177792	0.177792
Turkmenistan	0.078	0.177792	0.177792	0.177792	0.177792	0.177792	0.177792	0.177792
Uganda	0.078	0.2778	0.2778	0.2778	0.2778	0.2778	0.2778	0.2778
Ukraine	0.0647778	0.177792	0.177792	0.177792	0.177792	0.177792	0.177792	0.177792
United Republic of Tanzania	0.078	0.122232	0.122232	0.122232	0.122232	0.122232	0.122232	0.122232
United States of America	0.078	0.177792	0.177792	0.177792	0.177792	0.177792	0.177792	0.177792
Uzbekistan	0.0647778	0.177792	0.177792	0.177792	0.177792	0.177792	0.177792	0.177792
Venezuela	0.078	0.177792	0.177792	0.177792	0.177792	0.177792	0.177792	0.177792
Viet Nam	0.0464444	0.300024	0.300024	0.300024	0.300024	0.300024	0.300024	0.300024
Yemen	0.0647778	0.177792	0.177792	0.177792	0.177792	0.177792	0.177792	0.177792
Zambia	0.078	0.61116	0.61116	0.61116	0.61116	0.61116	0.61116	0.61116
Zimbabwe	0.078	0.144456	0.144456	0.144456	0.144456	0.144456	0.144456	0.144456

## Sheet: FP DALY Coefficients
H. FP DALY Averted Coefficients
Maternal DALYs averted from using one condom for FP
Country	2015	2016	2017	2018	2019	2020	2021	2022	2023	2024	2025	2026	2027	2028	2029	2030
Afghanistan	0.000194476	0.000177825	0.000161174	0.000144522	0.000127871	0.00011122	9.45688e-05	7.79176e-05	6.12664e-05	4.46152e-05	2.7964e-05	1.13128e-05	5.0879e-06	5.0879e-06	5.0879e-06	5.0879e-06
Africa	0.000262233	0.000252476	0.000242719	0.000232962	0.000223205	0.000213448	0.000203691	0.000193934	0.000184177	0.00017442	0.000164663	0.000154906	0.000145149	0.000135392	0.000125635	0.000115878
Albania	9.70077e-06	9.60933e-06	9.51788e-06	9.42644e-06	9.335e-06	9.24355e-06	9.15211e-06	9.06066e-06	8.96922e-06	8.87778e-06	8.78633e-06	8.69489e-06	8.60345e-06	8.512e-06	8.42056e-06	8.32911e-06
Algeria	9.85195e-05	9.7624e-05	9.67285e-05	9.58329e-05	9.49374e-05	9.40419e-05	9.31463e-05	9.22508e-05	9.13553e-05	9.04597e-05	8.95642e-05	8.86687e-05	8.77731e-05	8.68776e-05	8.59821e-05	8.50865e-05
Angola	0.0002279	0.00021456	0.000201219	0.000187879	0.000174538	0.000161198	0.000147857	0.000134517	0.000121176	0.000107836	9.44951e-05	8.11546e-05	6.78142e-05	5.44737e-05	4.11332e-05	2.77927e-05
Argentina	3.03189e-05	2.96055e-05	2.88921e-05	2.81787e-05	2.74654e-05	2.6752e-05	2.60386e-05	2.53253e-05	2.46119e-05	2.38985e-05	2.31851e-05	2.24718e-05	2.17584e-05	2.1045e-05	2.03317e-05	1.96183e-05
Armenia	1.61442e-05	1.5924e-05	1.57038e-05	1.54836e-05	1.52634e-05	1.50432e-05	1.48231e-05	1.46029e-05	1.43827e-05	1.41625e-05	1.39423e-05	1.37221e-05	1.3502e-05	1.32818e-05	1.30616e-05	1.28414e-05
Aruba	2.12082e-05	1.85704e-05	1.59326e-05	1.32947e-05	1.06569e-05	8.01911e-06	5.3813e-06	5.0879e-06	5.0879e-06	5.0879e-06	5.0879e-06	5.0879e-06	5.0879e-06	5.0879e-06	5.0879e-06	5.0879e-06
Asia	7.24298e-05	6.8851e-05	6.52721e-05	6.16933e-05	5.81145e-05	5.45356e-05	5.09568e-05	4.7378e-05	4.37992e-05	4.02203e-05	3.66415e-05	3.30627e-05	2.94838e-05	2.5905e-05	2.23262e-05	1.87474e-05
Australia	4.7267e-06	4.7267e-06	4.7267e-06	4.7267e-06	4.7267e-06	4.7267e-06	4.7267e-06	4.7267e-06	4.7267e-06	4.7267e-06	4.7267e-06	4.7267e-06	4.7267e-06	4.7267e-06	4.7267e-06	4.7267e-06
Australia/New Zealand	4.74206e-06	4.74206e-06	4.74206e-06	4.74206e-06	4.74206e-06	4.74206e-06	4.74206e-06	4.74206e-06	4.74206e-06	4.74206e-06	4.74206e-06	4.74206e-06	4.74206e-06	4.74206e-06	4.74206e-06	4.74206e-06
Austria	2.81313e-06	2.81313e-06	2.81313e-06	2.81313e-06	2.81313e-06	2.81313e-06	2.81313e-06	2.81313e-06	2.81313e-06	2.81313e-06	2.81313e-06	2.81313e-06	2.81313e-06	2.81313e-06	2.81313e-06	2.81313e-06
Azerbaijan	1.45134e-05	1.44032e-05	1.42929e-05	1.41827e-05	1.40724e-05	1.39622e-05	1.38519e-05	1.37417e-05	1.36314e-05	1.35212e-05	1.34109e-05	1.33007e-05	1.31904e-05	1.30802e-05	1.29699e-05	1.28597e-05
Bahamas	1.46179e-05	1.43705e-05	1.41231e-05	1.38757e-05	1.36284e-05	1.3381e-05	1.31336e-05	1.28863e-05	1.26389e-05	1.23915e-05	1.21442e-05	1.18968e-05	1.16494e-05	1.14021e-05	1.11547e-05	1.09073e-05
Bahrain	1.32054e-05	1.29688e-05	1.27322e-05	1.24956e-05	1.2259e-05	1.20225e-05	1.17859e-05	1.15493e-05	1.13127e-05	1.10761e-05	1.08395e-05	1.06029e-05	1.03664e-05	1.01298e-05	9.89319e-06	9.6566e-06
Bangladesh	8.31753e-05	7.76444e-05	7.21135e-05	6.65827e-05	6.10518e-05	5.5521e-05	4.99901e-05	4.44593e-05	3.89284e-05	3.33976e-05	2.78667e-05	2.23359e-05	1.6805e-05	1.12741e-05	5.74329e-06	5.0879e-06
Barbados	2.12118e-05	1.85735e-05	1.59353e-05	1.3297e-05	1.06587e-05	8.02044e-06	5.38216e-06	5.0879e-06	5.0879e-06	5.0879e-06	5.0879e-06	5.0879e-06	5.0879e-06	5.0879e-06	5.0879e-06	5.0879e-06
Belarus	1.34432e-06	1.34432e-06	1.34432e-06	1.34432e-06	1.34432e-06	1.34432e-06	1.34432e-06	1.34432e-06	1.34432e-06	1.34432e-06	1.34432e-06	1.34432e-06	1.34432e-06	1.34432e-06	1.34432e-06	1.34432e-06
Belgium	3.81275e-06	3.72129e-06	3.62984e-06	3.53838e-06	3.44692e-06	3.35546e-06	3.35546e-06	3.35546e-06	3.35546e-06	3.35546e-06	3.35546e-06	3.35546e-06	3.35546e-06	3.35546e-06	3.35546e-06	3.35546e-06
Belize	1.82496e-05	1.68068e-05	1.5364e-05	1.39213e-05	1.24785e-05	1.10357e-05	9.59289e-06	8.1501e-06	6.70732e-06	5.26453e-06	5.0879e-06	5.0879e-06	5.0879e-06	5.0879e-06	5.0879e-06	5.0879e-06
Benin	0.000201338	0.000195046	0.000188754	0.000182463	0.000176171	0.000169879	0.000163587	0.000157295	0.000151004	0.000144712	0.00013842	0.000132128	0.000125836	0.000119545	0.000113253	0.000106961
Bhutan	6.14724e-05	5.81309e-05	5.47894e-05	5.14479e-05	4.81064e-05	4.47649e-05	4.14234e-05	3.80819e-05	3.47404e-05	3.13989e-05	2.80574e-05	2.47159e-05	2.13744e-05	1.80329e-05	1.46914e-05	1.13499e-05
Bolivia (Plurinational State of)	7.83073e-05	7.50102e-05	7.17131e-05	6.84159e-05	6.51188e-05	6.18217e-05	5.85246e-05	5.52274e-05	5.19303e-05	4.86332e-05	4.5336e-05	4.20389e-05	3.87418e-05	3.54447e-05	3.21475e-05	2.88504e-05
Bosnia & Herzegovina	4.21769e-06	4.12615e-06	4.03461e-06	3.94307e-06	3.85152e-06	3.75998e-06	3.75998e-06	3.75998e-06	3.75998e-06	3.75998e-06	3.75998e-06	3.75998e-06	3.75998e-06	3.75998e-06	3.75998e-06	3.75998e-06
Botswana	0.00011589	0.00011044	0.000104991	9.9541e-05	9.40914e-05	8.86418e-05	8.31921e-05	7.77425e-05	7.22929e-05	6.68433e-05	6.13937e-05	5.5944e-05	5.04944e-05	4.50448e-05	3.95952e-05	3.41456e-05
Brazil	2.91301e-05	2.91301e-05	2.91301e-05	2.91301e-05	2.91301e-05	2.91301e-05	2.91301e-05	2.91301e-05	2.91301e-05	2.91301e-05	2.91301e-05	2.91301e-05	2.91301e-05	2.91301e-05	2.91301e-05	2.91301e-05
Brunei Darussalam	2.28353e-05	2.26641e-05	2.24929e-05	2.23217e-05	2.21505e-05	2.19794e-05	2.18082e-05	2.1637e-05	2.14658e-05	2.12947e-05	2.11235e-05	2.09523e-05	2.07811e-05	2.061e-05	2.04388e-05	2.02676e-05
Bulgaria	2.37229e-06	2.24673e-06	2.12116e-06	1.9956e-06	1.87003e-06	1.74447e-06	1.74447e-06	1.74447e-06	1.74447e-06	1.74447e-06	1.74447e-06	1.74447e-06	1.74447e-06	1.74447e-06	1.74447e-06	1.74447e-06
Burkina Faso	0.000232553	0.000223753	0.000214954	0.000206155	0.000197355	0.000188556	0.000179757	0.000170958	0.000162158	0.000153359	0.00014456	0.000135761	0.000126961	0.000118162	0.000109363	0.000100564
Burundi	0.000428773	0.000412617	0.000396461	0.000380304	0.000364148	0.000347992	0.000331836	0.00031568	0.000299524	0.000283368	0.000267211	0.000251055	0.000234899	0.000218743	0.000202587	0.000186431
Cambodia	6.49575e-05	6.17235e-05	5.84896e-05	5.52556e-05	5.20216e-05	4.87876e-05	4.55537e-05	4.23197e-05	3.90857e-05	3.58517e-05	3.26178e-05	2.93838e-05	2.61498e-05	2.29158e-05	1.96819e-05	1.64479e-05
Cameroon	0.000307154	0.000297102	0.000287049	0.000276997	0.000266945	0.000256892	0.00024684	0.000236788	0.000226735	0.000216683	0.000206631	0.000196579	0.000186526	0.000176474	0.000166422	0.000156369
Canada	7.3516e-06	7.10647e-06	6.86134e-06	6.6162e-06	6.37107e-06	6.12593e-06	5.8808e-06	5.63566e-06	5.39053e-06	5.14539e-06	5.0879e-06	5.0879e-06	5.0879e-06	5.0879e-06	5.0879e-06	5.0879e-06
Cape Verde	3.22418e-05	3.13568e-05	3.04717e-05	2.95867e-05	2.87016e-05	2.78165e-05	2.69315e-05	2.60464e-05	2.51614e-05	2.42763e-05	2.33913e-05	2.25062e-05	2.16212e-05	2.07361e-05	1.98511e-05	1.8966e-05
Caribbean	7.83128e-05	7.66681e-05	7.50234e-05	7.33787e-05	7.17339e-05	7.00892e-05	6.84445e-05	6.67998e-05	6.51551e-05	6.35103e-05	6.18656e-05	6.02209e-05	5.85762e-05	5.69315e-05	5.52868e-05	5.3642e-05
Central African Republic	0.000461655	0.000447194	0.000432732	0.000418271	0.000403809	0.000389348	0.000374886	0.000360425	0.000345963	0.000331502	0.00031704	0.000302579	0.000288118	0.000273656	0.000259195	0.000244733
Central America	2.78067e-05	2.755e-05	2.72934e-05	2.70367e-05	2.67801e-05	2.65234e-05	2.62667e-05	2.60101e-05	2.57534e-05	2.54968e-05	2.52401e-05	2.49835e-05	2.47268e-05	2.44702e-05	2.42135e-05	2.39569e-05
Central Asia	2.40531e-05	2.33555e-05	2.26579e-05	2.19603e-05	2.12627e-05	2.05651e-05	1.98675e-05	1.91699e-05	1.84723e-05	1.77746e-05	1.7077e-05	1.63794e-05	1.56818e-05	1.49842e-05	1.42866e-05	1.3589e-05
Chad	0.000506942	0.000485773	0.000464604	0.000443435	0.000422266	0.000401097	0.000379928	0.000358759	0.00033759	0.000316421	0.000295252	0.000274083	0.000252914	0.000231745	0.000210576	0.000189407
Channel Islands	4.75745e-06	4.46353e-06	4.16962e-06	3.8757e-06	3.58178e-06	3.28786e-06	3.28786e-06	3.28786e-06	3.28786e-06	3.28786e-06	3.28786e-06	3.28786e-06	3.28786e-06	3.28786e-06	3.28786e-06	3.28786e-06
Chile	9.78063e-06	9.60281e-06	9.425e-06	9.24718e-06	9.06936e-06	8.89154e-06	8.71372e-06	8.5359e-06	8.35808e-06	8.18026e-06	8.00244e-06	7.82463e-06	7.64681e-06	7.46899e-06	7.29117e-06	7.11335e-06
China	1.09565e-05	1.07327e-05	1.0509e-05	1.02853e-05	1.00616e-05	9.8379e-06	9.61419e-06	9.39048e-06	9.16677e-06	8.94306e-06	8.71935e-06	8.49564e-06	8.27193e-06	8.04822e-06	7.82451e-06	7.6008e-06
China, Hong Kong SAR	1.09565e-05	1.07327e-05	1.0509e-05	1.02853e-05	1.00616e-05	9.8379e-06	9.61419e-06	9.39048e-06	9.16677e-06	8.94306e-06	8.71935e-06	8.49564e-06	8.27193e-06	8.04822e-06	7.82451e-06	7.6008e-06
China, Macao SAR	1.09565e-05	1.07327e-05	1.0509e-05	1.02853e-05	1.00616e-05	9.8379e-06	9.61419e-06	9.39048e-06	9.16677e-06	8.94306e-06	8.71935e-06	8.49564e-06	8.27193e-06	8.04822e-06	7.82451e-06	7.6008e-06
Colombia	3.63764e-05	3.61102e-05	3.58441e-05	3.55779e-05	3.53118e-05	3.50456e-05	3.47794e-05	3.45133e-05	3.42471e-05	3.39809e-05	3.37148e-05	3.34486e-05	3.31824e-05	3.29163e-05	3.26501e-05	3.23839e-05
Comoros	0.000205135	0.000198919	0.000192704	0.000186488	0.000180272	0.000174056	0.00016784	0.000161625	0.000155409	0.000149193	0.000142977	0.000136761	0.000130546	0.00012433	0.000118114	0.000111898
Congo	0.000216718	0.00021005	0.000203381	0.000196713	0.000190045	0.000183377	0.000176708	0.00017004	0.000163372	0.000156704	0.000150035	0.000143367	0.000136699	0.000130031	0.000123362	0.000116694
Costa Rica	1.62783e-05	1.62783e-05	1.62783e-05	1.62783e-05	1.62783e-05	1.62783e-05	1.62783e-05	1.62783e-05	1.62783e-05	1.62783e-05	1.62783e-05	1.62783e-05	1.62783e-05	1.62783e-05	1.62783e-05	1.62783e-05
Côte d'Ivoire	0.000420831	0.000410781	0.000400731	0.000390682	0.000380632	0.000370582	0.000360533	0.000350483	0.000340433	0.000330384	0.000320334	0.000310284	0.000300235	0.000290185	0.000280135	0.000270086
Croatia	6.51278e-06	6.32948e-06	6.14618e-06	5.96289e-06	5.77959e-06	5.59629e-06	5.413e-06	5.2297e-06	5.0879e-06	5.0879e-06	5.0879e-06	5.0879e-06	5.0879e-06	5.0879e-06	5.0879e-06	5.0879e-06
Cuba	2.97513e-05	2.97513e-05	2.97513e-05	2.97513e-05	2.97513e-05	2.97513e-05	2.97513e-05	2.97513e-05	2.97513e-05	2.97513e-05	2.97513e-05	2.97513e-05	2.97513e-05	2.97513e-05	2.97513e-05	2.97513e-05
Cyprus	6.93825e-06	6.78943e-06	6.64061e-06	6.4918e-06	6.34298e-06	6.19416e-06	6.04534e-06	5.89652e-06	5.7477e-06	5.59888e-06	5.45007e-06	5.30125e-06	5.15243e-06	5.0879e-06	5.0879e-06	5.0879e-06
Czech Republic	2.46379e-06	2.46379e-06	2.46379e-06	2.46379e-06	2.46379e-06	2.46379e-06	2.46379e-06	2.46379e-06	2.46379e-06	2.46379e-06	2.46379e-06	2.46379e-06	2.46379e-06	2.46379e-06	2.46379e-06	2.46379e-06
Denmark	3.33185e-06	2.93854e-06	2.54524e-06	2.15193e-06	1.75863e-06	1.36532e-06	1.36532e-06	1.36532e-06	1.36532e-06	1.36532e-06	1.36532e-06	1.36532e-06	1.36532e-06	1.36532e-06	1.36532e-06	1.36532e-06
Djibouti	0.000136229	0.000132514	0.000128799	0.000125084	0.000121369	0.000117654	0.000113939	0.000110224	0.000106509	0.000102794	9.90794e-05	9.53645e-05	9.16495e-05	8.79345e-05	8.42196e-05	8.05046e-05
Dominican Republic	3.63772e-05	3.29228e-05	2.94684e-05	2.60141e-05	2.25597e-05	1.91054e-05	1.5651e-05	1.21967e-05	8.7423e-06	5.28794e-06	5.0879e-06	5.0879e-06	5.0879e-06	5.0879e-06	5.0879e-06	5.0879e-06
Democratic Republic of the Congo	0.000377087	0.000362669	0.000348251	0.000333833	0.000319415	0.000304997	0.000290579	0.000276161	0.000261743	0.000247325	0.000232907	0.000218489	0.000204071	0.000189653	0.000175235	0.000160817
Eastern Africa	0.000255223	0.000244018	0.000232814	0.00022161	0.000210405	0.000199201	0.000187997	0.000176793	0.000165588	0.000154384	0.00014318	0.000131975	0.000120771	0.000109567	9.83626e-05	8.71583e-05
Eastern Asia	1.12369e-05	1.10132e-05	1.07895e-05	1.05657e-05	1.0342e-05	1.01183e-05	9.89454e-06	9.67081e-06	9.44708e-06	9.22335e-06	8.99962e-06	8.77589e-06	8.55215e-06	8.32842e-06	8.10469e-06	7.88096e-06
Eastern Europe	4.29711e-06	4.12587e-06	3.95463e-06	3.78338e-06	3.61214e-06	3.4409e-06	3.4409e-06	3.4409e-06	3.4409e-06	3.4409e-06	3.4409e-06	3.4409e-06	3.4409e-06	3.4409e-06	3.4409e-06	3.4409e-06
Ecuador	3.47527e-05	3.42563e-05	3.37598e-05	3.32634e-05	3.27669e-05	3.22704e-05	3.1774e-05	3.12775e-05	3.07811e-05	3.02846e-05	2.97881e-05	2.92917e-05	2.87952e-05	2.82988e-05	2.78023e-05	2.73058e-05
Egypt	4.81269e-05	4.65603e-05	4.49937e-05	4.34272e-05	4.18606e-05	4.0294e-05	3.87275e-05	3.71609e-05	3.55944e-05	3.40278e-05	3.24612e-05	3.08947e-05	2.93281e-05	2.77615e-05	2.6195e-05	2.46284e-05
El Salvador	2.80864e-05	2.76609e-05	2.72354e-05	2.68099e-05	2.63844e-05	2.59589e-05	2.55334e-05	2.51078e-05	2.46823e-05	2.42568e-05	2.38313e-05	2.34058e-05	2.29803e-05	2.25548e-05	2.21293e-05	2.17037e-05
Equatorial Guinea	0.000150944	0.000144236	0.000137527	0.000130818	0.00012411	0.000117401	0.000110692	0.000103984	9.72752e-05	9.05665e-05	8.38579e-05	7.71493e-05	7.04406e-05	6.3732e-05	5.70234e-05	5.03147e-05
Eritrea	0.000218314	0.00020584	0.000193365	0.000180891	0.000168417	0.000155943	0.000143468	0.000130994	0.00011852	0.000106045	9.35711e-05	8.10968e-05	6.86225e-05	5.61482e-05	4.36739e-05	3.11996e-05
Estonia	3.7111e-06	3.7111e-06	3.7111e-06	3.7111e-06	3.7111e-06	3.7111e-06	3.7111e-06	3.7111e-06	3.7111e-06	3.7111e-06	3.7111e-06	3.7111e-06	3.7111e-06	3.7111e-06	3.7111e-06	3.7111e-06
Ethiopia	0.000220726	0.000206796	0.000192866	0.000178936	0.000165006	0.000151076	0.000137146	0.000123216	0.000109286	9.53557e-05	8.14257e-05	6.74957e-05	5.35657e-05	3.96357e-05	2.57057e-05	1.17758e-05
Europe	3.97355e-06	3.87466e-06	3.77577e-06	3.67687e-06	3.57798e-06	3.47909e-06	3.47909e-06	3.47909e-06	3.47909e-06	3.47909e-06	3.47909e-06	3.47909e-06	3.47909e-06	3.47909e-06	3.47909e-06	3.47909e-06
Fiji	2.64361e-05	2.60769e-05	2.57177e-05	2.53586e-05	2.49994e-05	2.46402e-05	2.4281e-05	2.39218e-05	2.35626e-05	2.32034e-05	2.28442e-05	2.2485e-05	2.21258e-05	2.17666e-05	2.14074e-05	2.10482e-05
Finland	2.89299e-06	2.69569e-06	2.49838e-06	2.30107e-06	2.10377e-06	1.90646e-06	1.90646e-06	1.90646e-06	1.90646e-06	1.90646e-06	1.90646e-06	1.90646e-06	1.90646e-06	1.90646e-06	1.90646e-06	1.90646e-06
France	6.41133e-06	6.41133e-06	6.41133e-06	6.41133e-06	6.41133e-06	6.41133e-06	6.41133e-06	6.41133e-06	6.41133e-06	6.41133e-06	6.41133e-06	6.41133e-06	6.41133e-06	6.41133e-06	6.41133e-06	6.41133e-06
French Guiana	0.000105096	0.000105096	0.000105096	0.000105096	0.000105096	0.000105096	0.000105096	0.000105096	0.000105096	0.000105096	0.000105096	0.000105096	0.000105096	0.000105096	0.000105096	0.000105096
French Polynesia	2.81074e-05	2.78983e-05	2.76891e-05	2.74799e-05	2.72708e-05	2.70616e-05	2.68524e-05	2.66433e-05	2.64341e-05	2.6225e-05	2.60158e-05	2.58066e-05	2.55975e-05	2.53883e-05	2.51791e-05	2.497e-05
Gabon	0.000128535	0.000125182	0.000121829	0.000118475	0.000115122	0.000111769	0.000108416	0.000105063	0.00010171	9.8357e-05	9.50039e-05	9.16508e-05	8.82977e-05	8.49447e-05	8.15916e-05	7.82385e-05
Gambia	0.000251452	0.000243908	0.000236364	0.000228821	0.000221277	0.000213734	0.00020619	0.000198647	0.000191103	0.00018356	0.000176016	0.000168473	0.000160929	0.000153386	0.000145842	0.000138299
Georgia	2.38183e-05	2.38183e-05	2.38183e-05	2.38183e-05	2.38183e-05	2.38183e-05	2.38183e-05	2.38183e-05	2.38183e-05	2.38183e-05	2.38183e-05	2.38183e-05	2.38183e-05	2.38183e-05	2.38183e-05	2.38183e-05
Germany	4.23028e-06	4.23028e-06	4.23028e-06	4.23028e-06	4.23028e-06	4.23028e-06	4.23028e-06	4.23028e-06	4.23028e-06	4.23028e-06	4.23028e-06	4.23028e-06	4.23028e-06	4.23028e-06	4.23028e-06	4.23028e-06
Ghana	0.000233105	0.000228065	0.000223025	0.000217985	0.000212945	0.000207905	0.000202864	0.000197824	0.000192784	0.000187744	0.000182704	0.000177664	0.000172624	0.000167584	0.000162544	0.000157504
Greece	3.77773e-06	3.77773e-06	3.77773e-06	3.77773e-06	3.77773e-06	3.77773e-06	3.77773e-06	3.77773e-06	3.77773e-06	3.77773e-06	3.77773e-06	3.77773e-06	3.77773e-06	3.77773e-06	3.77773e-06	3.77773e-06
Grenada	9.65591e-06	9.65591e-06	9.65591e-06	9.65591e-06	9.65591e-06	9.65591e-06	9.65591e-06	9.65591e-06	9.65591e-06	9.65591e-06	9.65591e-06	9.65591e-06	9.65591e-06	9.65591e-06	9.65591e-06	9.65591e-06
Guadeloupe	2.36594e-05	2.34806e-05	2.33017e-05	2.31229e-05	2.2944e-05	2.27652e-05	2.25863e-05	2.24074e-05	2.22286e-05	2.20497e-05	2.18709e-05	2.1692e-05	2.15132e-05	2.13343e-05	2.11555e-05	2.09766e-05
Guam	2.80235e-05	2.7815e-05	2.76065e-05	2.7398e-05	2.71894e-05	2.69809e-05	2.67724e-05	2.65639e-05	2.63554e-05	2.61469e-05	2.59384e-05	2.57299e-05	2.55214e-05	2.53129e-05	2.51044e-05	2.48959e-05
Guatemala	5.5493e-05	5.46393e-05	5.37856e-05	5.29319e-05	5.20782e-05	5.12245e-05	5.03708e-05	4.95171e-05	4.86634e-05	4.78097e-05	4.6956e-05	4.61023e-05	4.52486e-05	4.43949e-05	4.35412e-05	4.26875e-05
Guinea	0.000377632	0.000366303	0.000354975	0.000343646	0.000332317	0.000320988	0.000309659	0.00029833	0.000287001	0.000275672	0.000264343	0.000253014	0.000241685	0.000230356	0.000219027	0.000207698
Guinea-Bissau	0.000326219	0.000316181	0.000306144	0.000296106	0.000286069	0.000276031	0.000265994	0.000255956	0.000245919	0.000235881	0.000225844	0.000215806	0.000205769	0.000195731	0.000185694	0.000175656
Guyana	0.000105108	0.000105108	0.000105108	0.000105108	0.000105108	0.000105108	0.000105108	0.000105108	0.000105108	0.000105108	0.000105108	0.000105108	0.000105108	0.000105108	0.000105108	0.000105108
Haiti	0.000151917	0.000147816	0.000143715	0.000139614	0.000135514	0.000131413	0.000127312	0.000123211	0.000119111	0.00011501	0.000110909	0.000106808	0.000102708	9.8607e-05	9.45063e-05	9.04055e-05
Honduras	4.67001e-05	4.58511e-05	4.5002e-05	4.4153e-05	4.33039e-05	4.24549e-05	4.16058e-05	4.07568e-05	3.99077e-05	3.90587e-05	3.82096e-05	3.73606e-05	3.65116e-05	3.56625e-05	3.48135e-05	3.39644e-05
Hungary	4.23738e-06	3.94453e-06	3.65167e-06	3.35882e-06	3.06596e-06	2.77311e-06	2.77311e-06	2.77311e-06	2.77311e-06	2.77311e-06	2.77311e-06	2.77311e-06	2.77311e-06	2.77311e-06	2.77311e-06	2.77311e-06
Iceland	2.79971e-06	2.70164e-06	2.60356e-06	2.50549e-06	2.40742e-06	2.30934e-06	2.30934e-06	2.30934e-06	2.30934e-06	2.30934e-06	2.30934e-06	2.30934e-06	2.30934e-06	2.30934e-06	2.30934e-06	2.30934e-06
India	0.000106046	0.000102704	9.93617e-05	9.60196e-05	9.26774e-05	8.93353e-05	8.59931e-05	8.2651e-05	7.93089e-05	7.59667e-05	7.26246e-05	6.92824e-05	6.59403e-05	6.25982e-05	5.9256e-05	5.59139e-05
Indonesia	7.31743e-05	7.07444e-05	6.83145e-05	6.58847e-05	6.34548e-05	6.10249e-05	5.8595e-05	5.61651e-05	5.37352e-05	5.13053e-05	4.88754e-05	4.64456e-05	4.40157e-05	4.15858e-05	3.91559e-05	3.6726e-05
Iran (Islamic Republic of)	1.45131e-05	1.42647e-05	1.40164e-05	1.37681e-05	1.35197e-05	1.32714e-05	1.30231e-05	1.27748e-05	1.25264e-05	1.22781e-05	1.20298e-05	1.17814e-05	1.15331e-05	1.12848e-05	1.10364e-05	1.07881e-05
Iraq	3.74625e-05	3.62794e-05	3.50962e-05	3.39131e-05	3.27299e-05	3.15468e-05	3.03636e-05	2.91804e-05	2.79973e-05	2.68141e-05	2.5631e-05	2.44478e-05	2.32647e-05	2.20815e-05	2.08984e-05	1.97152e-05
Ireland	4.75815e-06	4.56217e-06	4.36619e-06	4.1702e-06	3.97422e-06	3.77823e-06	3.77823e-06	3.77823e-06	3.77823e-06	3.77823e-06	3.77823e-06	3.77823e-06	3.77823e-06	3.77823e-06	3.77823e-06	3.77823e-06
Israel	1.89021e-06	1.68236e-06	1.47451e-06	1.26666e-06	1.05882e-06	8.50967e-07	8.50967e-07	8.50967e-07	8.50967e-07	8.50967e-07	8.50967e-07	8.50967e-07	8.50967e-07	8.50967e-07	8.50967e-07	8.50967e-07
Italy	2.86426e-06	2.86426e-06	2.86426e-06	2.86426e-06	2.86426e-06	2.86426e-06	2.86426e-06	2.86426e-06	2.86426e-06	2.86426e-06	2.86426e-06	2.86426e-06	2.86426e-06	2.86426e-06	2.86426e-06	2.86426e-06
Jamaica	3.26596e-05	3.2413e-05	3.21664e-05	3.19198e-05	3.16732e-05	3.14266e-05	3.118e-05	3.09333e-05	3.06867e-05	3.04401e-05	3.01935e-05	2.99469e-05	2.97003e-05	2.94537e-05	2.9207e-05	2.89604e-05
Japan	4.55137e-06	4.55137e-06	4.55137e-06	4.55137e-06	4.55137e-06	4.55137e-06	4.55137e-06	4.55137e-06	4.55137e-06	4.55137e-06	4.55137e-06	4.55137e-06	4.55137e-06	4.55137e-06	4.55137e-06	4.55137e-06
Jordan	2.85169e-05	2.79268e-05	2.73367e-05	2.67467e-05	2.61566e-05	2.55665e-05	2.49765e-05	2.43864e-05	2.37963e-05	2.32063e-05	2.26162e-05	2.20261e-05	2.1436e-05	2.0846e-05	2.02559e-05	1.96658e-05
Kazakhstan	1.5352e-05	1.37222e-05	1.20924e-05	1.04626e-05	8.83281e-06	7.203e-06	5.5732e-06	5.0879e-06	5.0879e-06	5.0879e-06	5.0879e-06	5.0879e-06	5.0879e-06	5.0879e-06	5.0879e-06	5.0879e-06
Kenya	0.000236941	0.000226965	0.000216989	0.000207013	0.000197037	0.000187062	0.000177086	0.00016711	0.000157134	0.000147158	0.000137182	0.000127206	0.00011723	0.000107255	9.72786e-05	8.73028e-05
Democratic People's Republic of Korea	2.54493e-05	2.46679e-05	2.38866e-05	2.31052e-05	2.23239e-05	2.15425e-05	2.07612e-05	1.99798e-05	1.91985e-05	1.84171e-05	1.76357e-05	1.68544e-05	1.6073e-05	1.52917e-05	1.45103e-05	1.3729e-05
Kuwait	6.12193e-06	5.76619e-06	5.41044e-06	5.05469e-06	4.69895e-06	4.3432e-06	4.3432e-06	4.3432e-06	4.3432e-06	4.3432e-06	4.3432e-06	4.3432e-06	4.3432e-06	4.3432e-06	4.3432e-06	4.3432e-06
Kyrgyzstan	4.31834e-05	4.26028e-05	4.20222e-05	4.14416e-05	4.0861e-05	4.02804e-05	3.96997e-05	3.91191e-05	3.85385e-05	3.79579e-05	3.73773e-05	3.67967e-05	3.62161e-05	3.56355e-05	3.50549e-05	3.44743e-05
Lao People's Democratic Republic	8.13027e-05	7.5631e-05	6.99592e-05	6.42874e-05	5.86157e-05	5.29439e-05	4.72722e-05	4.16004e-05	3.59287e-05	3.02569e-05	2.45852e-05	1.89134e-05	1.32416e-05	7.56989e-06	5.0879e-06	5.0879e-06
Latin America and the Caribbean	3.73257e-05	3.67798e-05	3.62338e-05	3.56879e-05	3.51419e-05	3.45959e-05	3.405e-05	3.3504e-05	3.29581e-05	3.24121e-05	3.18661e-05	3.13202e-05	3.07742e-05	3.02282e-05	2.96823e-05	2.91363e-05
Latvia	4.52524e-06	3.81299e-06	3.10074e-06	2.38849e-06	1.67624e-06	9.63991e-07	9.63991e-07	9.63991e-07	9.63991e-07	9.63991e-07	9.63991e-07	9.63991e-07	9.63991e-07	9.63991e-07	9.63991e-07	9.63991e-07
Least developed countries	0.000248125	0.000238446	0.000228768	0.000219089	0.00020941	0.000199732	0.000190053	0.000180374	0.000170696	0.000161017	0.000151338	0.00014166	0.000131981	0.000122302	0.000112624	0.000102945
Lebanon	9.06682e-06	8.71188e-06	8.35693e-06	8.00198e-06	7.64704e-06	7.29209e-06	6.93714e-06	6.5822e-06	6.22725e-06	5.8723e-06	5.51736e-06	5.16241e-06	5.0879e-06	5.0879e-06	5.0879e-06	5.0879e-06
Lesotho	0.000318384	0.000308903	0.000299422	0.000289941	0.000280459	0.000270978	0.000261497	0.000252016	0.000242534	0.000233053	0.000223572	0.000214091	0.00020461	0.000195128	0.000185647	0.000176166
Less developed regions	0.000102608	9.9818e-05	9.70282e-05	9.42384e-05	9.14486e-05	8.86587e-05	8.58689e-05	8.30791e-05	8.02893e-05	7.74994e-05	7.47096e-05	7.19198e-05	6.913e-05	6.63402e-05	6.35503e-05	6.07605e-05
Less developed regions, excluding China	0.000125139	0.000120451	0.000115764	0.000111076	0.000106388	0.0001017	9.70127e-05	9.2325e-05	8.76372e-05	8.29495e-05	7.82618e-05	7.35741e-05	6.88864e-05	6.41986e-05	5.95109e-05	5.48232e-05
Less developed regions, excluding least developed countries	7.10005e-05	6.92342e-05	6.74678e-05	6.57014e-05	6.3935e-05	6.21686e-05	6.04023e-05	5.86359e-05	5.68695e-05	5.51031e-05	5.33368e-05	5.15704e-05	4.9804e-05	4.80376e-05	4.62712e-05	4.45049e-05
Liberia	0.000389531	0.000381992	0.000374453	0.000366913	0.000359374	0.000351835	0.000344295	0.000336756	0.000329217	0.000321678	0.000314138	0.000306599	0.00029906	0.00029152	0.000283981	0.000276442
Libya	1.68073e-05	1.68073e-05	1.68073e-05	1.68073e-05	1.68073e-05	1.68073e-05	1.68073e-05	1.68073e-05	1.68073e-05	1.68073e-05	1.68073e-05	1.68073e-05	1.68073e-05	1.68073e-05	1.68073e-05	1.68073e-05
Lithuania	4.81799e-06	4.81799e-06	4.81799e-06	4.81799e-06	4.81799e-06	4.81799e-06	4.81799e-06	4.81799e-06	4.81799e-06	4.81799e-06	4.81799e-06	4.81799e-06	4.81799e-06	4.81799e-06	4.81799e-06	4.81799e-06
Luxembourg	5.99817e-06	5.81622e-06	5.63428e-06	5.45233e-06	5.27039e-06	5.08844e-06	5.0879e-06	5.0879e-06	5.0879e-06	5.0879e-06	5.0879e-06	5.0879e-06	5.0879e-06	5.0879e-06	5.0879e-06	5.0879e-06
Madagascar	0.00025583	0.000247095	0.00023836	0.000229624	0.000220889	0.000212154	0.000203419	0.000194684	0.000185948	0.000177213	0.000168478	0.000159743	0.000151008	0.000142273	0.000133537	0.000124802
Malawi	0.000298968	0.000291494	0.000284021	0.000276547	0.000269073	0.000261599	0.000254125	0.000246651	0.000239177	0.000231704	0.00022423	0.000216756	0.000209282	0.000201808	0.000194334	0.00018686
Malaysia	1.16725e-05	1.14283e-05	1.11841e-05	1.09399e-05	1.06957e-05	1.04515e-05	1.02073e-05	9.96313e-06	9.71894e-06	9.47474e-06	9.23055e-06	8.98636e-06	8.74217e-06	8.49797e-06	8.25378e-06	8.00959e-06
Maldives	1.75294e-05	1.66061e-05	1.56828e-05	1.47595e-05	1.38362e-05	1.2913e-05	1.19897e-05	1.10664e-05	1.01431e-05	9.21977e-06	8.29648e-06	7.37318e-06	6.44989e-06	5.52659e-06	5.0879e-06	5.0879e-06
Mali	0.000327385	0.000317312	0.000307238	0.000297165	0.000287091	0.000277018	0.000266945	0.000256871	0.000246798	0.000236725	0.000226651	0.000216578	0.000206505	0.000196431	0.000186358	0.000176284
Malta	5.34851e-06	5.34851e-06	5.34851e-06	5.34851e-06	5.34851e-06	5.34851e-06	5.34851e-06	5.34851e-06	5.34851e-06	5.34851e-06	5.34851e-06	5.34851e-06	5.34851e-06	5.34851e-06	5.34851e-06	5.34851e-06
Martinique	2.12082e-05	1.85704e-05	1.59326e-05	1.32947e-05	1.06569e-05	8.01911e-06	5.3813e-06	5.0879e-06	5.0879e-06	5.0879e-06	5.0879e-06	5.0879e-06	5.0879e-06	5.0879e-06	5.0879e-06	5.0879e-06
Mauritania	0.000188428	0.000180891	0.000173354	0.000165817	0.00015828	0.000150743	0.000143206	0.000135669	0.000128131	0.000120594	0.000113057	0.00010552	9.79831e-05	9.04459e-05	8.29088e-05	7.53717e-05
Mauritius	4.14705e-05	4.07167e-05	3.9963e-05	3.92092e-05	3.84555e-05	3.77017e-05	3.69479e-05	3.61942e-05	3.54404e-05	3.46867e-05	3.39329e-05	3.31791e-05	3.24254e-05	3.16716e-05	3.09179e-05	3.01641e-05
Mayotte	4.11903e-05	4.04416e-05	3.96929e-05	3.89443e-05	3.81956e-05	3.74469e-05	3.66983e-05	3.59496e-05	3.52009e-05	3.44523e-05	3.37036e-05	3.29549e-05	3.22063e-05	3.14576e-05	3.07089e-05	2.99603e-05
Melanesia	8.07176e-05	7.77552e-05	7.47929e-05	7.18306e-05	6.88683e-05	6.5906e-05	6.29436e-05	5.99813e-05	5.7019e-05	5.40567e-05	5.10944e-05	4.8132e-05	4.51697e-05	4.22074e-05	3.92451e-05	3.62828e-05
Mexico	1.87967e-05	1.86307e-05	1.84646e-05	1.82986e-05	1.81325e-05	1.79665e-05	1.78005e-05	1.76344e-05	1.74684e-05	1.73023e-05	1.71363e-05	1.69702e-05	1.68042e-05	1.66381e-05	1.64721e-05	1.6306e-05
Micronesia	1.66483e-05	1.60506e-05	1.54528e-05	1.48551e-05	1.42573e-05	1.36596e-05	1.30618e-05	1.24641e-05	1.18663e-05	1.12686e-05	1.06708e-05	1.00731e-05	9.47531e-06	8.87756e-06	8.27981e-06	7.68206e-06
Micronesia	1.66483e-05	1.60506e-05	1.54528e-05	1.48551e-05	1.42573e-05	1.36596e-05	1.30618e-05	1.24641e-05	1.18663e-05	1.12686e-05	1.06708e-05	1.00731e-05	9.47531e-06	8.87756e-06	8.27981e-06	7.68206e-06
Middle Africa	0.000349659	0.000336339	0.000323019	0.000309698	0.000296378	0.000283058	0.000269737	0.000256417	0.000243097	0.000229776	0.000216456	0.000203135	0.000189815	0.000176495	0.000163174	0.000149854
Moldova	4.63558e-06	3.98562e-06	3.33565e-06	2.68569e-06	2.03573e-06	1.38576e-06	1.38576e-06	1.38576e-06	1.38576e-06	1.38576e-06	1.38576e-06	1.38576e-06	1.38576e-06	1.38576e-06	1.38576e-06	1.38576e-06
Mongolia	1.21965e-05	1.19664e-05	1.17362e-05	1.1506e-05	1.12759e-05	1.10457e-05	1.08156e-05	1.05854e-05	1.03553e-05	1.01251e-05	9.89497e-06	9.66482e-06	9.43467e-06	9.20452e-06	8.97436e-06	8.74421e-06
Montenegro	3.7627e-06	3.7627e-06	3.7627e-06	3.7627e-06	3.7627e-06	3.7627e-06	3.7627e-06	3.7627e-06	3.7627e-06	3.7627e-06	3.7627e-06	3.7627e-06	3.7627e-06	3.7627e-06	3.7627e-06	3.7627e-06
More developed regions	7.8136e-06	7.73105e-06	7.64849e-06	7.56593e-06	7.48337e-06	7.40081e-06	7.31826e-06	7.2357e-06	7.15314e-06	7.07058e-06	6.98802e-06	6.90547e-06	6.82291e-06	6.74035e-06	6.65779e-06	6.57523e-06
Morocco	0.000134103	0.000131868	0.000129633	0.000127398	0.000125164	0.000122929	0.000120694	0.000118459	0.000116224	0.000113989	0.000111754	0.000109519	0.000107285	0.00010505	0.000102815	0.00010058
Mozambique	0.000279515	0.000268335	0.000257155	0.000245975	0.000234795	0.000223615	0.000212435	0.000201255	0.000190074	0.000178894	0.000167714	0.000156534	0.000145354	0.000134174	0.000122994	0.000111814
Myanmar	7.6996e-05	7.45733e-05	7.21507e-05	6.9728e-05	6.73053e-05	6.48827e-05	6.246e-05	6.00373e-05	5.76147e-05	5.5192e-05	5.27693e-05	5.03467e-05	4.7924e-05	4.55013e-05	4.30787e-05	4.0656e-05
Namibia	8.18843e-05	7.64311e-05	7.09778e-05	6.55245e-05	6.00713e-05	5.4618e-05	4.91647e-05	4.37115e-05	3.82582e-05	3.28049e-05	2.73517e-05	2.18984e-05	1.64452e-05	1.09919e-05	5.53862e-06	5.0879e-06
Nepal	9.48465e-05	8.92797e-05	8.3713e-05	7.81462e-05	7.25795e-05	6.70127e-05	6.14459e-05	5.58792e-05	5.03124e-05	4.47457e-05	3.91789e-05	3.36122e-05	2.80454e-05	2.24786e-05	1.69119e-05	1.13451e-05
Netherlands	3.81224e-06	3.72079e-06	3.62935e-06	3.53791e-06	3.44647e-06	3.35503e-06	3.35503e-06	3.35503e-06	3.35503e-06	3.35503e-06	3.35503e-06	3.35503e-06	3.35503e-06	3.35503e-06	3.35503e-06	3.35503e-06
Netherlands Antilles	1.88103e-07	1.88103e-07	1.88103e-07	1.88103e-07	1.88103e-07	1.88103e-07	1.88103e-07	1.88103e-07	1.88103e-07	1.88103e-07	1.88103e-07	1.88103e-07	1.88103e-07	1.88103e-07	1.88103e-07	1.88103e-07
New Caledonia	2.80472e-05	2.78385e-05	2.76298e-05	2.74212e-05	2.72125e-05	2.70038e-05	2.67951e-05	2.65864e-05	2.63777e-05	2.6169e-05	2.59603e-05	2.57516e-05	2.55429e-05	2.53342e-05	2.51255e-05	2.49168e-05
New Zealand	6.09693e-06	5.5543e-06	5.01167e-06	4.46904e-06	3.92641e-06	3.38378e-06	3.38378e-06	3.38378e-06	3.38378e-06	3.38378e-06	3.38378e-06	3.38378e-06	3.38378e-06	3.38378e-06	3.38378e-06	3.38378e-06
Nicaragua	4.25739e-05	4.17225e-05	4.08711e-05	4.00196e-05	3.91682e-05	3.83168e-05	3.74654e-05	3.66139e-05	3.57625e-05	3.49111e-05	3.40597e-05	3.32082e-05	3.23568e-05	3.15054e-05	3.0654e-05	2.98025e-05
Niger	0.000365226	0.000351372	0.000337519	0.000323666	0.000309812	0.000295959	0.000282106	0.000268252	0.000254399	0.000240545	0.000226692	0.000212839	0.000198985	0.000185132	0.000171279	0.000157425
Nigeria	0.000330234	0.000320264	0.000310295	0.000300326	0.000290356	0.000280387	0.000270418	0.000260449	0.000250479	0.00024051	0.000230541	0.000220571	0.000210602	0.000200633	0.000190663	0.000180694
Northern Africa	7.49743e-05	7.34079e-05	7.18415e-05	7.02752e-05	6.87088e-05	6.71424e-05	6.5576e-05	6.40096e-05	6.24432e-05	6.08768e-05	5.93104e-05	5.7744e-05	5.61776e-05	5.46112e-05	5.30448e-05	5.14784e-05
Northern America	1.65486e-05	1.65486e-05	1.65486e-05	1.65486e-05	1.65486e-05	1.65486e-05	1.65486e-05	1.65486e-05	1.65486e-05	1.65486e-05	1.65486e-05	1.65486e-05	1.65486e-05	1.65486e-05	1.65486e-05	1.65486e-05
Northern Europe	4.26838e-06	3.97438e-06	3.68039e-06	3.3864e-06	3.09241e-06	2.79841e-06	2.79841e-06	2.79841e-06	2.79841e-06	2.79841e-06	2.79841e-06	2.79841e-06	2.79841e-06	2.79841e-06	2.79841e-06	2.79841e-06
Norway	2.33841e-06	2.14188e-06	1.94535e-06	1.74882e-06	1.55229e-06	1.35576e-06	1.35576e-06	1.35576e-06	1.35576e-06	1.35576e-06	1.35576e-06	1.35576e-06	1.35576e-06	1.35576e-06	1.35576e-06	1.35576e-06
Occupied Palestinian Territory	2.61515e-05	2.50896e-05	2.40277e-05	2.29658e-05	2.19039e-05	2.08419e-05	1.978e-05	1.87181e-05	1.76562e-05	1.65943e-05	1.55324e-05	1.44704e-05	1.34085e-05	1.23466e-05	1.12847e-05	1.02228e-05
Oceania	7.12756e-05	6.8913e-05	6.65504e-05	6.41878e-05	6.18252e-05	5.94626e-05	5.71e-05	5.47374e-05	5.23748e-05	5.00122e-05	4.76496e-05	4.5287e-05	4.29244e-05	4.05619e-05	3.81993e-05	3.58367e-05
Oman	6.11649e-06	5.87955e-06	5.64261e-06	5.40567e-06	5.16872e-06	4.93178e-06	4.93178e-06	4.93178e-06	4.93178e-06	4.93178e-06	4.93178e-06	4.93178e-06	4.93178e-06	4.93178e-06	4.93178e-06	4.93178e-06
Pakistan	8.82557e-05	8.49541e-05	8.16525e-05	7.83509e-05	7.50493e-05	7.17477e-05	6.84461e-05	6.51445e-05	6.18429e-05	5.85413e-05	5.52397e-05	5.19381e-05	4.86365e-05	4.53349e-05	4.20333e-05	3.87317e-05
Panama	3.49942e-05	3.49942e-05	3.49942e-05	3.49942e-05	3.49942e-05	3.49942e-05	3.49942e-05	3.49942e-05	3.49942e-05	3.49942e-05	3.49942e-05	3.49942e-05	3.49942e-05	3.49942e-05	3.49942e-05	3.49942e-05
Papua New Guinea	9.0048e-05	8.64619e-05	8.28758e-05	7.92896e-05	7.57035e-05	7.21174e-05	6.85312e-05	6.49451e-05	6.1359e-05	5.77728e-05	5.41867e-05	5.06006e-05	4.70144e-05	4.34283e-05	3.98422e-05	3.6256e-05
Paraguay	4.18979e-05	4.106e-05	4.0222e-05	3.93841e-05	3.85461e-05	3.77082e-05	3.68702e-05	3.60323e-05	3.51943e-05	3.43564e-05	3.35184e-05	3.26805e-05	3.18425e-05	3.10046e-05	3.01667e-05	2.93287e-05
Peru	3.48033e-05	3.34774e-05	3.21516e-05	3.08258e-05	2.95e-05	2.81742e-05	2.68484e-05	2.55225e-05	2.41967e-05	2.28709e-05	2.15451e-05	2.02193e-05	1.88935e-05	1.75676e-05	1.62418e-05	1.4916e-05
Philippines	4.88405e-05	4.88405e-05	4.88405e-05	4.88405e-05	4.88405e-05	4.88405e-05	4.88405e-05	4.88405e-05	4.88405e-05	4.88405e-05	4.88405e-05	4.88405e-05	4.88405e-05	4.88405e-05	4.88405e-05	4.88405e-05
Poland	1.65756e-06	1.61649e-06	1.57543e-06	1.53436e-06	1.4933e-06	1.45223e-06	1.45223e-06	1.45223e-06	1.45223e-06	1.45223e-06	1.45223e-06	1.45223e-06	1.45223e-06	1.45223e-06	1.45223e-06	1.45223e-06
Polynesia	2.35367e-05	2.33454e-05	2.31542e-05	2.2963e-05	2.27718e-05	2.25806e-05	2.23894e-05	2.21981e-05	2.20069e-05	2.18157e-05	2.16245e-05	2.14333e-05	2.12421e-05	2.10508e-05	2.08596e-05	2.06684e-05
Portugal	5.34926e-06	5.13974e-06	4.93022e-06	4.7207e-06	4.51118e-06	4.30166e-06	4.30166e-06	4.30166e-06	4.30166e-06	4.30166e-06	4.30166e-06	4.30166e-06	4.30166e-06	4.30166e-06	4.30166e-06	4.30166e-06
Puerto Rico	8.1633e-06	8.1633e-06	8.1633e-06	8.1633e-06	8.1633e-06	8.1633e-06	8.1633e-06	8.1633e-06	8.1633e-06	8.1633e-06	8.1633e-06	8.1633e-06	8.1633e-06	8.1633e-06	8.1633e-06	8.1633e-06
Qatar	3.15139e-06	2.91473e-06	2.67807e-06	2.44141e-06	2.20475e-06	1.96809e-06	1.96809e-06	1.96809e-06	1.96809e-06	1.96809e-06	1.96809e-06	1.96809e-06	1.96809e-06	1.96809e-06	1.96809e-06	1.96809e-06
Republic of Korea	1.1129e-05	1.1129e-05	1.1129e-05	1.1129e-05	1.1129e-05	1.1129e-05	1.1129e-05	1.1129e-05	1.1129e-05	1.1129e-05	1.1129e-05	1.1129e-05	1.1129e-05	1.1129e-05	1.1129e-05	1.1129e-05
Réunion	4.14705e-05	4.07167e-05	3.9963e-05	3.92092e-05	3.84555e-05	3.77017e-05	3.69479e-05	3.61942e-05	3.54404e-05	3.46867e-05	3.39329e-05	3.31791e-05	3.24254e-05	3.16716e-05	3.09179e-05	3.01641e-05
Romania	8.83964e-06	8.83964e-06	8.83964e-06	8.83964e-06	8.83964e-06	8.83964e-06	8.83964e-06	8.83964e-06	8.83964e-06	8.83964e-06	8.83964e-06	8.83964e-06	8.83964e-06	8.83964e-06	8.83964e-06	8.83964e-06
Russian Federation	5.0446e-06	4.80669e-06	4.56878e-06	4.33087e-06	4.09296e-06	3.85505e-06	3.85505e-06	3.85505e-06	3.85505e-06	3.85505e-06	3.85505e-06	3.85505e-06	3.85505e-06	3.85505e-06	3.85505e-06	3.85505e-06
Rwanda	0.000180726	0.000168263	0.0001558	0.000143337	0.000130874	0.000118412	0.000105949	9.34857e-05	8.10228e-05	6.85599e-05	5.60969e-05	4.3634e-05	3.11711e-05	1.87082e-05	6.24529e-06	5.0879e-06
Saint Lucia	1.3729e-05	1.35649e-05	1.34008e-05	1.32367e-05	1.30725e-05	1.29084e-05	1.27443e-05	1.25802e-05	1.24161e-05	1.2252e-05	1.20878e-05	1.19237e-05	1.17596e-05	1.15955e-05	1.14314e-05	1.12672e-05
Saint Vincent & the Grenadines	3.51897e-05	3.51897e-05	3.51897e-05	3.51897e-05	3.51897e-05	3.51897e-05	3.51897e-05	3.51897e-05	3.51897e-05	3.51897e-05	3.51897e-05	3.51897e-05	3.51897e-05	3.51897e-05	3.51897e-05	3.51897e-05
Samoa	2.60343e-05	2.55845e-05	2.51347e-05	2.46848e-05	2.4235e-05	2.37852e-05	2.33354e-05	2.28855e-05	2.24357e-05	2.19859e-05	2.1536e-05	2.10862e-05	2.06364e-05	2.01866e-05	1.97367e-05	1.92869e-05
Sao Tome and Principe	0.000111975	0.000108615	0.000105256	0.000101897	9.85376e-05	9.51783e-05	9.18191e-05	8.84599e-05	8.51006e-05	8.17414e-05	7.83822e-05	7.50229e-05	7.16637e-05	6.83044e-05	6.49452e-05	6.1586e-05
Saudi Arabia	9.66421e-06	9.66421e-06	9.66421e-06	9.66421e-06	9.66421e-06	9.66421e-06	9.66421e-06	9.66421e-06	9.66421e-06	9.66421e-06	9.66421e-06	9.66421e-06	9.66421e-06	9.66421e-06	9.66421e-06	9.66421e-06
Senegal	0.000187757	0.000180247	0.000172736	0.000165226	0.000157716	0.000150206	0.000142695	0.000135185	0.000127675	0.000120165	0.000112654	0.000105144	9.76338e-05	9.01236e-05	8.26134e-05	7.51031e-05
Serbia	1.06184e-05	1.06184e-05	1.06184e-05	1.06184e-05	1.06184e-05	1.06184e-05	1.06184e-05	1.06184e-05	1.06184e-05	1.06184e-05	1.06184e-05	1.06184e-05	1.06184e-05	1.06184e-05	1.06184e-05	1.06184e-05
Sierra Leone	0.000620918	0.000594576	0.000568234	0.000541892	0.00051555	0.000489208	0.000462866	0.000436524	0.000410182	0.00038384	0.000357498	0.000331156	0.000304815	0.000278473	0.000252131	0.000225789
Singapore	6.119e-06	6.119e-06	6.119e-06	6.119e-06	6.119e-06	6.119e-06	6.119e-06	6.119e-06	6.119e-06	6.119e-06	6.119e-06	6.119e-06	6.119e-06	6.119e-06	6.119e-06	6.119e-06
Slovakia	2.87942e-06	2.87942e-06	2.87942e-06	2.87942e-06	2.87942e-06	2.87942e-06	2.87942e-06	2.87942e-06	2.87942e-06	2.87942e-06	2.87942e-06	2.87942e-06	2.87942e-06	2.87942e-06	2.87942e-06	2.87942e-06
Slovenia	3.72693e-06	3.6355e-06	3.54408e-06	3.45265e-06	3.36123e-06	3.2698e-06	3.2698e-06	3.2698e-06	3.2698e-06	3.2698e-06	3.2698e-06	3.2698e-06	3.2698e-06	3.2698e-06	3.2698e-06	3.2698e-06
Solomon Islands	5.41616e-05	5.23693e-05	5.05771e-05	4.87849e-05	4.69927e-05	4.52004e-05	4.34082e-05	4.1616e-05	3.98238e-05	3.80315e-05	3.62393e-05	3.44471e-05	3.26549e-05	3.08626e-05	2.90704e-05	2.72782e-05
Somalia	0.000490236	0.000472861	0.000455486	0.000438111	0.000420736	0.000403361	0.000385986	0.000368611	0.000351236	0.000333862	0.000316487	0.000299112	0.000281737	0.000264362	0.000246987	0.000229612
South Africa	8.8403e-05	8.70443e-05	8.56855e-05	8.43268e-05	8.29681e-05	8.16094e-05	8.02506e-05	7.88919e-05	7.75332e-05	7.61745e-05	7.48157e-05	7.3457e-05	7.20983e-05	7.07396e-05	6.93808e-05	6.80221e-05
South America	3.55542e-05	3.51098e-05	3.46654e-05	3.4221e-05	3.37765e-05	3.33321e-05	3.28877e-05	3.24433e-05	3.19989e-05	3.15544e-05	3.111e-05	3.06656e-05	3.02212e-05	2.97768e-05	2.93323e-05	2.88879e-05
South-Central Asia	9.73145e-05	9.40754e-05	9.08363e-05	8.75973e-05	8.43582e-05	8.11192e-05	7.78801e-05	7.46411e-05	7.1402e-05	6.81629e-05	6.49239e-05	6.16848e-05	5.84458e-05	5.52067e-05	5.19677e-05	4.87286e-05
South-Eastern Asia	5.70007e-05	5.61904e-05	5.53801e-05	5.45698e-05	5.37594e-05	5.29491e-05	5.21388e-05	5.13284e-05	5.05181e-05	4.97078e-05	4.88974e-05	4.80871e-05	4.72768e-05	4.64665e-05	4.56561e-05	4.48458e-05
Southern Africa	0.000102007	9.92888e-05	9.65709e-05	9.3853e-05	9.11351e-05	8.84173e-05	8.56994e-05	8.29815e-05	8.02636e-05	7.75457e-05	7.48278e-05	7.21099e-05	6.9392e-05	6.66741e-05	6.39562e-05	6.12383e-05
Southern Asia	0.000100248	9.69136e-05	9.3579e-05	9.02445e-05	8.691e-05	8.35754e-05	8.02409e-05	7.69063e-05	7.35718e-05	7.02372e-05	6.69027e-05	6.35682e-05	6.02336e-05	5.68991e-05	5.35645e-05	5.023e-05
Southern Europe	3.7626e-06	3.7626e-06	3.7626e-06	3.7626e-06	3.7626e-06	3.7626e-06	3.7626e-06	3.7626e-06	3.7626e-06	3.7626e-06	3.7626e-06	3.7626e-06	3.7626e-06	3.7626e-06	3.7626e-06	3.7626e-06
Spain	2.72973e-06	2.52028e-06	2.31082e-06	2.10137e-06	1.89192e-06	1.68246e-06	1.68246e-06	1.68246e-06	1.68246e-06	1.68246e-06	1.68246e-06	1.68246e-06	1.68246e-06	1.68246e-06	1.68246e-06	1.68246e-06
Sri Lanka	1.69205e-05	1.65749e-05	1.62294e-05	1.58838e-05	1.55382e-05	1.51927e-05	1.48471e-05	1.45015e-05	1.41559e-05	1.38104e-05	1.34648e-05	1.31192e-05	1.27737e-05	1.24281e-05	1.20825e-05	1.17369e-05
Sub-Saharan Africa	0.000295489	0.000284173	0.000272857	0.000261541	0.000250225	0.000238909	0.000227592	0.000216276	0.00020496	0.000193644	0.000182328	0.000171012	0.000159696	0.00014838	0.000137064	0.000125747
Sudan	0.000344428	0.000334298	0.000324169	0.000314039	0.000303909	0.000293779	0.000283649	0.000273519	0.000263389	0.000253259	0.000243129	0.000232999	0.000222869	0.000212739	0.000202609	0.000192479
South Sudan	0.000747987	0.000712263	0.000676538	0.000640814	0.00060509	0.000569366	0.000533642	0.000497917	0.000462193	0.000426469	0.000390745	0.00035502	0.000319296	0.000283572	0.000247848	0.000212124
Suriname	5.70204e-05	5.5266e-05	5.35115e-05	5.1757e-05	5.00026e-05	4.82481e-05	4.64937e-05	4.47392e-05	4.29848e-05	4.12303e-05	3.94758e-05	3.77214e-05	3.59669e-05	3.42125e-05	3.2458e-05	3.07036e-05
Swaziland	0.000204198	0.000197394	0.00019059	0.000183787	0.000176983	0.000170179	0.000163375	0.000156572	0.000149768	0.000142964	0.00013616	0.000129357	0.000122553	0.000115749	0.000108945	0.000102142
Sweden	2.73462e-06	2.63695e-06	2.53929e-06	2.44162e-06	2.34396e-06	2.24629e-06	2.24629e-06	2.24629e-06	2.24629e-06	2.24629e-06	2.24629e-06	2.24629e-06	2.24629e-06	2.24629e-06	2.24629e-06	2.24629e-06
Switzerland	3.34668e-06	3.07233e-06	2.79799e-06	2.52364e-06	2.2493e-06	1.97496e-06	1.97496e-06	1.97496e-06	1.97496e-06	1.97496e-06	1.97496e-06	1.97496e-06	1.97496e-06	1.97496e-06	1.97496e-06	1.97496e-06
Syria	2.7932e-05	2.75779e-05	2.72238e-05	2.68697e-05	2.65156e-05	2.61615e-05	2.58073e-05	2.54532e-05	2.50991e-05	2.4745e-05	2.43909e-05	2.40368e-05	2.36827e-05	2.33286e-05	2.29745e-05	2.26204e-05
Tajikistan	2.45831e-05	2.3887e-05	2.31909e-05	2.24947e-05	2.17986e-05	2.11025e-05	2.04063e-05	1.97102e-05	1.90141e-05	1.83179e-05	1.76218e-05	1.69257e-05	1.62296e-05	1.55334e-05	1.48373e-05	1.41412e-05
United Republic of Tanzania	0.000236429	0.000226475	0.00021652	0.000206566	0.000196612	0.000186657	0.000176703	0.000166749	0.000156794	0.00014684	0.000136886	0.000126931	0.000116977	0.000107023	9.70685e-05	8.71142e-05
TFYR Macedonia	3.75399e-06	3.75399e-06	3.75399e-06	3.75399e-06	3.75399e-06	3.75399e-06	3.75399e-06	3.75399e-06	3.75399e-06	3.75399e-06	3.75399e-06	3.75399e-06	3.75399e-06	3.75399e-06	3.75399e-06	3.75399e-06
Thailand	1.08678e-05	1.07049e-05	1.05419e-05	1.0379e-05	1.0216e-05	1.00531e-05	9.89017e-06	9.72723e-06	9.56428e-06	9.40134e-06	9.2384e-06	9.07546e-06	8.91252e-06	8.74958e-06	8.58664e-06	8.4237e-06
Timor-Leste	9.74968e-05	9.02054e-05	8.29139e-05	7.56225e-05	6.8331e-05	6.10396e-05	5.37482e-05	4.64567e-05	3.91653e-05	3.18739e-05	2.45824e-05	1.7291e-05	9.99956e-06	5.0879e-06	5.0879e-06	5.0879e-06
Togo	0.000270452	0.000264163	0.000257873	0.000251584	0.000245294	0.000239005	0.000232715	0.000226425	0.000220136	0.000213846	0.000207557	0.000201267	0.000194978	0.000188688	0.000182398	0.000176109
Tonga	5.44176e-05	5.44176e-05	5.44176e-05	5.44176e-05	5.44176e-05	5.44176e-05	5.44176e-05	5.44176e-05	5.44176e-05	5.44176e-05	5.44176e-05	5.44176e-05	5.44176e-05	5.44176e-05	5.44176e-05	5.44176e-05
Trinidad & Tobago	3.5235e-05	3.5235e-05	3.5235e-05	3.5235e-05	3.5235e-05	3.5235e-05	3.5235e-05	3.5235e-05	3.5235e-05	3.5235e-05	3.5235e-05	3.5235e-05	3.5235e-05	3.5235e-05	3.5235e-05	3.5235e-05
Tunisia	5.03971e-05	4.97253e-05	4.90534e-05	4.83816e-05	4.77098e-05	4.7038e-05	4.63662e-05	4.56944e-05	4.50226e-05	4.43507e-05	4.36789e-05	4.30071e-05	4.23353e-05	4.16635e-05	4.09917e-05	4.03199e-05
Turkey	1.20057e-05	1.17695e-05	1.15333e-05	1.1297e-05	1.10608e-05	1.08245e-05	1.05883e-05	1.0352e-05	1.01158e-05	9.87953e-06	9.64328e-06	9.40703e-06	9.17078e-06	8.93454e-06	8.69829e-06	8.46204e-06
Turkmenistan	3.50125e-05	3.44326e-05	3.38527e-05	3.32728e-05	3.26929e-05	3.2113e-05	3.15331e-05	3.09532e-05	3.03733e-05	2.97934e-05	2.92135e-05	2.86336e-05	2.80537e-05	2.74738e-05	2.68939e-05	2.6314e-05
UAE	4.94026e-06	4.94026e-06	4.94026e-06	4.94026e-06	4.94026e-06	4.94026e-06	4.94026e-06	4.94026e-06	4.94026e-06	4.94026e-06	4.94026e-06	4.94026e-06	4.94026e-06	4.94026e-06	4.94026e-06	4.94026e-06
Uganda	0.000211638	0.000202924	0.00019421	0.000185496	0.000176782	0.000168068	0.000159354	0.00015064	0.000141926	0.000133212	0.000124498	0.000115785	0.000107071	9.83567e-05	8.96427e-05	8.09288e-05
Ukraine	5.15083e-06	5.01393e-06	4.87702e-06	4.74011e-06	4.6032e-06	4.4663e-06	4.4663e-06	4.4663e-06	4.4663e-06	4.4663e-06	4.4663e-06	4.4663e-06	4.4663e-06	4.4663e-06	4.4663e-06	4.4663e-06
United Kingdom	4.74385e-06	4.45014e-06	4.15643e-06	3.86273e-06	3.56902e-06	3.27532e-06	3.27532e-06	3.27532e-06	3.27532e-06	3.27532e-06	3.27532e-06	3.27532e-06	3.27532e-06	3.27532e-06	3.27532e-06	3.27532e-06
United States Virgin Islands	4.60165e-05	4.02931e-05	3.45697e-05	2.88463e-05	2.31229e-05	1.73995e-05	1.16761e-05	5.95268e-06	5.0879e-06	5.0879e-06	5.0879e-06	5.0879e-06	5.0879e-06	5.0879e-06	5.0879e-06	5.0879e-06
Uruguay	6.22255e-06	5.42258e-06	4.62262e-06	3.82265e-06	3.02269e-06	2.22272e-06	2.22272e-06	2.22272e-06	2.22272e-06	2.22272e-06	2.22272e-06	2.22272e-06	2.22272e-06	2.22272e-06	2.22272e-06	2.22272e-06
United States of America	1.7775e-05	1.7775e-05	1.7775e-05	1.7775e-05	1.7775e-05	1.7775e-05	1.7775e-05	1.7775e-05	1.7775e-05	1.7775e-05	1.7775e-05	1.7775e-05	1.7775e-05	1.7775e-05	1.7775e-05	1.7775e-05
Uzbekistan	2.17422e-05	2.13931e-05	2.10441e-05	2.06951e-05	2.0346e-05	1.9997e-05	1.96479e-05	1.92989e-05	1.89499e-05	1.86008e-05	1.82518e-05	1.79028e-05	1.75537e-05	1.72047e-05	1.68556e-05	1.65066e-05
Vanuatu	3.85535e-05	3.81046e-05	3.76557e-05	3.72067e-05	3.67578e-05	3.63089e-05	3.586e-05	3.5411e-05	3.49621e-05	3.45132e-05	3.40642e-05	3.36153e-05	3.31664e-05	3.27174e-05	3.22685e-05	3.18196e-05
Venezuela	4.41793e-05	4.32957e-05	4.24122e-05	4.15286e-05	4.0645e-05	3.97614e-05	3.88779e-05	3.79943e-05	3.71107e-05	3.62271e-05	3.53436e-05	3.446e-05	3.35764e-05	3.26928e-05	3.18093e-05	3.09257e-05
Viet Nam	1.97385e-05	1.94952e-05	1.9252e-05	1.90087e-05	1.87654e-05	1.85222e-05	1.82789e-05	1.80357e-05	1.77924e-05	1.75491e-05	1.73059e-05	1.70626e-05	1.68193e-05	1.65761e-05	1.63328e-05	1.60896e-05
Western Africa	0.00031914	0.000309127	0.000299115	0.000289103	0.000279091	0.000269079	0.000259066	0.000249054	0.000239042	0.00022903	0.000219018	0.000209005	0.000198993	0.000188981	0.000178969	0.000168957
Western Asia	3.91548e-05	3.82103e-05	3.72658e-05	3.63213e-05	3.53768e-05	3.44322e-05	3.34877e-05	3.25432e-05	3.15987e-05	3.06542e-05	2.97097e-05	2.87651e-05	2.78206e-05	2.68761e-05	2.59316e-05	2.49871e-05
Western Europe	5.0879e-06	5.0879e-06	5.0879e-06	5.0879e-06	5.0879e-06	5.0879e-06	5.0879e-06	5.0879e-06	5.0879e-06	5.0879e-06	5.0879e-06	5.0879e-06	5.0879e-06	5.0879e-06	5.0879e-06	5.0879e-06
Western Sahara	0.000134089	0.000131854	0.000129619	0.000127385	0.00012515	0.000122915	0.000120681	0.000118446	0.000116212	0.000113977	0.000111742	0.000109508	0.000107273	0.000105038	0.000102804	0.000100569
World	9.18227e-05	8.90786e-05	8.63344e-05	8.35903e-05	8.08461e-05	7.8102e-05	7.53578e-05	7.26137e-05	6.98695e-05	6.71254e-05	6.43812e-05	6.16371e-05	5.88929e-05	5.61488e-05	5.34046e-05	5.06605e-05
Yemen	0.000146748	0.000142058	0.000137368	0.000132679	0.000127989	0.000123299	0.00011861	0.00011392	0.00010923	0.00010454	9.98508e-05	9.51611e-05	9.04714e-05	8.57817e-05	8.10919e-05	7.64022e-05
Zambia	0.000161774	0.000154309	0.000146843	0.000139377	0.000131911	0.000124445	0.000116979	0.000109513	0.000102047	9.45816e-05	8.71157e-05	7.96498e-05	7.2184e-05	6.47181e-05	5.72522e-05	4.97863e-05
Zimbabwe	0.000283892	0.000260126	0.000236359	0.000212593	0.000188826	0.00016506	0.000141293	0.000117527	9.37603e-05	6.99938e-05	4.62273e-05	2.24607e-05	5.0879e-06	5.0879e-06	5.0879e-06	5.0879e-06
Child DALYs averted from using one condom for FP
Afghanistan	0.0019879
Africa	0.00223406
Albania	0.000127965
Algeria	0.000248256
Angola	0.00287715
Argentina	0.000152462
Armenia	0.000157776
Aruba	8.07996e-05
Asia	0.000421958
Australia	4.1853e-05
Australia/New Zealand	4.49236e-05
Austria	1.5677e-05
Azerbaijan	0.000381188
Bahamas	0.000151667
Bahrain	9.04377e-05
Bangladesh	0.000590293
Barbados	6.37354e-05
Belarus	1.55628e-05
Belgium	2.83122e-05
Belize	0.000317192
Benin	0.00203009
Bhutan	0.000674776
Bolivia (Plurinational State of)	0.0007086
Bosnia & Herzegovina	2.67437e-05
Botswana	0.00103273
Brazil	0.000184737
Brunei Darussalam	5.52668e-05
Bulgaria	1.99944e-05
Burkina Faso	0.00271462
Burundi	0.00271314
Cambodia	0.000658083
Cameroon	0.00231381
Canada	3.34476e-05
Cape Verde	0.000520071
Caribbean	0.000663754
Central African Republic	0.00283586
Central America	0.000227056
Central Asia	0.000448256
Chad	0.00359939
Channel Islands	2.48147e-05
Chile	6.23428e-05
China	3.9791e-05
China, Hong Kong SAR	9.14848e-06
China, Macao SAR	6.56046e-06
Colombia	0.000201144
Comoros	0.0011876
Congo	0.00212291
Costa Rica	7.38906e-05
Côte d'Ivoire	0.00205659
Croatia	2.78853e-05
Cuba	3.05495e-05
Cyprus	1.84105e-05
Czech Republic	7.79623e-06
Denmark	3.11078e-05
Djibouti	0.00126744
Dominican Republic	0.000375371
Democratic Republic of the Congo	0.00279845
Eastern Africa	0.00218721
Eastern Asia	3.83183e-05
Eastern Europe	2.15026e-05
Ecuador	0.000291301
Egypt	0.000396138
El Salvador	0.000206666
Equatorial Guinea	0.00383114
Eritrea	0.00164361
Estonia	3.91414e-05
Ethiopia	0.00220109
Europe	2.36039e-05
Fiji	0.000397803
Finland	2.24745e-05
France	2.78406e-05
French Guiana	0.000675575
French Polynesia	8.55486e-05
Gabon	0.00112744
Gambia	0.00159806
Georgia	0.000164422
Germany	1.50218e-05
Ghana	0.00144365
Greece	1.73777e-05
Grenada	0.000132342
Guadeloupe	7.6386e-05
Guam	0.000101566
Guatemala	0.000477608
Guinea	0.00267346
Guinea-Bissau	0.00319934
Guyana	0.000464717
Haiti	0.00148855
Honduras	0.00028378
Hungary	9.4604e-06
Iceland	2.42482e-05
India	0.000809962
Indonesia	0.000281711
Iran (Islamic Republic of)	0.000236673
Iraq	0.000550209
Ireland	3.46521e-05
Israel	7.34778e-05
Italy	1.5788e-05
Jamaica	0.00022074
Japan	4.27442e-06
Jordan	0.000246056
Kazakhstan	0.00033311
Kenya	0.00176037
Democratic People's Republic of Korea	9.37079e-05
Kuwait	9.00155e-05
Kyrgyzstan	0.000510243
Lao People's Democratic Republic	0.000718577
Latin America and the Caribbean	0.000259844
Latvia	4.2826e-05
Least developed countries	0.00171688
Lebanon	9.37969e-05
Lesotho	0.00188306
Less developed regions	0.000817197
Less developed regions, excluding China	0.00104727
Less developed regions, excluding least developed countries	0.000581006
Liberia	0.00195947
Libya	0.000195182
Lithuania	2.78884e-05
Luxembourg	1.72043e-05
Madagascar	0.0014947
Malawi	0.00212713
Malaysia	4.87456e-05
Maldives	0.000127244
Mali	0.003252
Malta	1.97897e-05
Martinique	9.38524e-05
Mauritania	0.00161978
Mauritius	0.000126471
Mayotte	0.000767992
Melanesia	0.00122518
Mexico	0.000166582
Micronesia	0.000193924
Micronesia	0.000193924
Middle Africa	0.0027962
Moldova	2.93964e-05
Mongolia	0.000107006
Montenegro	6.38985e-05
More developed regions	3.67629e-05
Morocco	0.000411742
Mozambique	0.00286971
Myanmar	0.000454572
Namibia	0.00108771
Nepal	0.000652629
Netherlands	2.68479e-05
Netherlands Antilles	9.88209e-05
New Caledonia	7.96874e-05
New Zealand	5.89688e-05
Nicaragua	0.000346006
Niger	0.00324709
Nigeria	0.00308873
Northern Africa	0.000697557
Northern America	6.99651e-05
Northern Europe	3.56825e-05
Norway	2.67283e-05
Occupied Palestinian Territory	0.000419582
Oceania	0.000518156
Oman	0.000160909
Pakistan	0.00113284
Panama	0.000215297
Papua New Guinea	0.00140528
Paraguay	0.000350943
Peru	0.000345696
Philippines	0.000331824
Poland	9.29912e-06
Polynesia	0.000230592
Portugal	1.58992e-05
Puerto Rico	6.17398e-05
Qatar	0.000138573
Republic of Korea	5.92298e-06
Réunion	0.00141966
Romania	2.4588e-05
Russian Federation	2.53304e-05
Rwanda	0.00225316
Saint Lucia	0.000110741
Saint Vincent & the Grenadines	0.000239587
Samoa	0.000312436
Sao Tome and Principe	0.00114002
Saudi Arabia	0.000265421
Senegal	0.00169387
Serbia	2.67552e-05
Sierra Leone	0.00275768
Singapore	7.12307e-06
Slovakia	9.8596e-06
Slovenia	1.46909e-05
Solomon Islands	0.000485444
Somalia	0.00245164
South Africa	0.000922937
South America	0.000225143
South-Central Asia	0.000945254
South-Eastern Asia	0.00026669
Southern Africa	0.00101056
Southern Asia	0.000853223
Southern Europe	2.27602e-05
Spain	1.93639e-05
Sri Lanka	0.000107235
Sub-Saharan Africa	0.00244233
Sudan	0.00160652
South Sudan	0.00160652
Suriname	0.000454309
Swaziland	0.00208181
Sweden	2.07502e-05
Switzerland	1.89426e-05
Syria	0.000208896
Tajikistan	0.000652018
United Republic of Tanzania	0.00215863
TFYR Macedonia	6.19927e-05
Thailand	5.26184e-05
Timor-Leste	0.000827802
Togo	0.00169643
Tonga	0.000325929
Trinidad & Tobago	0.000174532
Tunisia	0.000139101
Turkey	0.000324671
Turkmenistan	0.000302629
UAE	2.94713e-05
Uganda	0.00258201
Ukraine	2.45985e-05
United Kingdom	4.02163e-05
United States Virgin Islands	7.79509e-05
Uruguay	0.000124588
United States of America	7.30365e-05
Uzbekistan	0.000457384
Vanuatu	0.000386108
Venezuela	0.000219913
Viet Nam	9.29661e-05
Western Africa	0.00273947
Western Asia	0.000463888
Western Europe	2.22449e-05
Western Sahara	0.000478983
World	0.000719166
Yemen	0.00113971
Zambia	0.00262048
Zimbabwe	0.00123534

## Sheet: Condom Gap
I. Condom Gap Calculation, All Countries and Fast Track Countries
Country	Subregion	FP Condoms 2015 baseline	HIV/STI Condoms, 2015 baseline	Total 2015 condom	HIV/STI Condoms, 2016 High Scenario
Afghanistan	Southern Asia	1.16045e+07	9.69128e+06	2.12958e+07	2.6967e+07
Angola	Middle Africa	4.30291e+06	3.81888e+07	4.24917e+07	1.09685e+08
Azerbaijan	Western Asia	1.03018e+06	8.69349e+06	9.72367e+06	2.4108e+07
Bangladesh	Southern Asia	2.71833e+08	5.49753e+07	3.26809e+08	1.13704e+08
Benin	Western Africa	4.31693e+06	1.71234e+07	2.14403e+07	6.1929e+07
Bolivia (Plurinational State of)	South America	1.41443e+07	2.66301e+07	4.07744e+07	5.03384e+07
Botswana	Southern Africa	1.38726e+07	1.19977e+07	2.58702e+07	1.51515e+07
Brazil	South America	4.87369e+08	7.66829e+08	1.2542e+09	1.03011e+09
Burkina Faso	Western Africa	2.5193e+06	3.4627e+07	3.71463e+07	8.86236e+07
Burundi	Eastern Africa	1.72743e+06	4.54156e+06	6.26899e+06	1.53337e+07
Cambodia	South-Eastern Asia	6.97223e+06	1.70724e+07	2.40446e+07	2.57198e+07
Cameroon	Middle Africa	8.94309e+07	9.09954e+07	1.80426e+08	1.87415e+08
Central African Republic	Middle Africa	5.33486e+06	1.27197e+07	1.80546e+07	2.50108e+07
Chad	Middle Africa	607534	1.35196e+07	1.41272e+07	6.2086e+07
China	Eastern Asia	2.11244e+09	1.53718e+09	3.64961e+09	2.19536e+09
Comoros	Eastern Africa	561805	1.04126e+06	1.60307e+06	2.5663e+06
Congo	Middle Africa	2.283e+07	1.67706e+07	3.96007e+07	4.22617e+07
Côte d'Ivoire	Western Africa	4.05212e+07	7.37663e+07	1.14288e+08	1.79315e+08
Democratic People's Republic of Korea	Eastern Asia	1.02677e+06	2.43476e+07	2.53744e+07	3.33417e+07
Democratic Republic of the Congo	Middle Africa	1.161e+08	6.41714e+08	7.57815e+08	1.20519e+09
Djibouti	Eastern Africa	4925.72	1.29305e+06	1.29798e+06	4.91896e+06
Egypt	Northern Africa	1.34412e+07	1.73689e+07	3.08101e+07	7.01053e+07
Equatorial Guinea	Middle Africa	11258	1.10018e+06	1.11143e+06	3.7432e+06
Eritrea	Eastern Africa	2.34733e+06	6.8363e+06	9.18363e+06	2.47158e+07
Ethiopia	Eastern Africa	9.85144e+06	3.26925e+07	4.2544e+07	1.21871e+08
Gabon	Middle Africa	1.59574e+06	8.28325e+06	9.87899e+06	1.48324e+07
Gambia	Western Africa	546764	1.67692e+06	2.22368e+06	5.12727e+06
Ghana	Western Africa	8.33281e+06	4.4653e+07	5.29858e+07	1.20626e+08
Guatemala	Central America	6.66288e+06	5.05215e+07	5.71844e+07	6.93268e+07
Guinea	Western Africa	1.10604e+07	1.73026e+07	2.8363e+07	6.08958e+07
Guinea-Bissau	Western Africa	981306	4.90897e+06	5.89027e+06	9.75859e+06
Haiti	Caribbean	2.1641e+07	5.7177e+07	7.88179e+07	9.51114e+07
India	Southern Asia	1.99586e+09	3.37764e+08	2.33362e+09	7.71805e+08
Indonesia	South-Eastern Asia	2.99614e+07	1.42094e+08	1.72055e+08	3.26565e+08
Iran (Islamic Republic of)	Western Asia	7.05815e+07	4.86155e+07	1.19197e+08	1.15852e+08
Iraq	Western Asia	1.43389e+07	3.68236e+07	5.11625e+07	6.2366e+07
Jamaica	Caribbean	1.03215e+07	2.01671e+07	3.04887e+07	2.61596e+07
Kenya	Eastern Africa	2.14979e+07	1.05064e+08	1.26561e+08	2.17479e+08
Kyrgyzstan	Central Asia	1.29524e+07	1.55498e+07	2.85022e+07	1.99142e+07
Lao People's Democratic Republic	South-Eastern Asia	1.76346e+06	5.71066e+06	7.47412e+06	9.42606e+06
Lesotho	Southern Africa	8.6246e+06	1.15747e+07	2.01993e+07	1.95187e+07
Liberia	Western Africa	1.30238e+06	5.56747e+06	6.86985e+06	2.08205e+07
Madagascar	Eastern Africa	9.05184e+06	2.23166e+07	3.13685e+07	1.14692e+08
Malawi	Eastern Africa	7.80219e+06	1.89355e+07	2.67377e+07	6.31109e+07
Mali	Western Africa	1.08539e+06	1.26908e+07	1.37762e+07	5.81655e+07
Mauritania	Western Africa	519696	4.18785e+06	4.70754e+06	1.69854e+07
Mexico	Central America	1.5073e+08	4.38758e+08	5.89488e+08	5.80395e+08
Morocco	Northern Africa	6.92367e+06	1.63494e+07	2.32731e+07	4.28318e+07
Mozambique	Eastern Africa	4.64367e+07	9.76343e+07	1.44071e+08	2.69919e+08
Myanmar	South-Eastern Asia	5.20092e+06	4.73984e+07	5.25993e+07	7.56426e+07
Namibia	Southern Africa	4.24147e+06	8.82437e+06	1.30658e+07	1.15737e+07
Nepal	Southern Asia	2.70996e+07	4.20324e+07	6.9132e+07	6.3041e+07
Niger	Western Africa	547298	1.03039e+07	1.08512e+07	6.24537e+07
Nigeria	Western Africa	2.41435e+08	1.94874e+08	4.36309e+08	7.03444e+08
Pakistan	Southern Asia	3.57781e+08	6.13483e+07	4.1913e+08	2.15025e+08
Papua New Guinea	Melanesia	3.19049e+06	6.07601e+06	9.26651e+06	1.13046e+07
Peru	South America	6.25184e+07	7.28534e+07	1.35372e+08	1.61281e+08
Philippines	South-Eastern Asia	4.50978e+07	8.65761e+07	1.31674e+08	2.40354e+08
Russian Federation	Central Asia	5.18953e+08	3.80559e+08	8.99512e+08	4.86615e+08
Rwanda	Eastern Africa	7.24153e+06	8.34017e+06	1.55817e+07	2.10109e+07
Sao Tome and Principe	Middle Africa	425591	233689	659280	640328
Senegal	Western Africa	4.36342e+06	1.2362e+07	1.67254e+07	3.65011e+07
Solomon Islands	Melanesia	61381.5	2.04983e+06	2.11122e+06	5.89417e+06
Sierra Leone	Western Africa	1.37017e+06	6.30277e+06	7.67294e+06	4.43546e+07
Somalia	Eastern Africa	6325.1	9.13941e+06	9.14573e+06	4.49842e+07
South Africa	Southern Africa	1.21212e+08	2.70592e+08	3.91804e+08	3.43159e+08
South Sudan	Eastern Africa	2.56555e+06	1.93766e+07	2.19422e+07	6.22892e+07
Sudan	Northern Africa	157667	9.60148e+06	9.75914e+06	4.42734e+07
Swaziland	Southern Africa	4.2074e+06	5.31299e+06	9.52039e+06	8.07298e+06
Tajikistan	Central Asia	4.72027e+06	2.4292e+07	2.90122e+07	3.09741e+07
Togo	Western Africa	1.25993e+07	1.21007e+07	2.47e+07	3.47249e+07
Turkmenistan	Central Asia	1.16721e+06	1.63823e+07	1.75495e+07	2.02797e+07
Uganda	Eastern Africa	2.12317e+07	5.04407e+07	7.16724e+07	2.1341e+08
Ukraine	Central Asia	1.25726e+08	1.27844e+08	2.5357e+08	2.03703e+08
United Republic of Tanzania	Eastern Africa	7.63926e+07	1.00895e+08	1.77288e+08	3.301e+08
United States of America	Northern America	6.46417e+08	7.37162e+08	1.38358e+09	1.07831e+09
Uzbekistan	Central Asia	1.62032e+07	9.05692e+07	1.06772e+08	1.11043e+08
Viet Nam	South-Eastern Asia	2.85248e+08	7.07132e+07	3.55962e+08	1.16634e+08
Yemen	Western Asia	2.65423e+06	8.15481e+06	1.0809e+07	2.93968e+07
Zambia	Eastern Africa	1.64103e+07	2.85733e+07	4.49836e+07	8.51271e+07
Zimbabwe	Eastern Africa	1.16806e+07	2.50093e+07	3.66899e+07	6.62505e+07
Total		8.3029e+09	7.53233e+09	1.58352e+10	1.37931e+10
Total (billions)		8.3029	7.53233	15.8352	13.7931
Fast Track Countries
Country	Subregion	FP Condoms 2015 baseline	HIV/STI Condoms, 2015 baseline	Total 2015 condom	HIV/STI Condoms, 2016 High Scenario
Angola	Middle Africa	4.30291e+06	3.81888e+07	4.24917e+07	1.09685e+08
Botswana	Southern Africa	1.38726e+07	1.19977e+07	2.58702e+07	1.51515e+07
Brazil	South America	4.87369e+08	7.66829e+08	1.2542e+09	1.03011e+09
Cameroon	Middle Africa	8.94309e+07	9.09954e+07	1.80426e+08	1.87415e+08
Chad	Middle Africa	607534	1.35196e+07	1.41272e+07	6.2086e+07
China	Eastern Asia	2.11244e+09	1.53718e+09	3.64961e+09	2.19536e+09
Côte d'Ivoire	Western Africa	4.05212e+07	7.37663e+07	1.14288e+08	1.79315e+08
Democratic Republic of the Congo	Middle Africa	1.161e+08	6.41714e+08	7.57815e+08	1.20519e+09
Ethiopia	Eastern Africa	9.85144e+06	3.26925e+07	4.2544e+07	1.21871e+08
Ghana	Western Africa	8.33281e+06	4.4653e+07	5.29858e+07	1.20626e+08
Haiti	Caribbean	2.1641e+07	5.7177e+07	7.88179e+07	9.51114e+07
India	Southern Asia	1.99586e+09	3.37764e+08	2.33362e+09	7.71805e+08
Indonesia	South-Eastern Asia	2.99614e+07	1.42094e+08	1.72055e+08	3.26565e+08
Iran (Islamic Republic of)	Western Asia	7.05815e+07	4.86155e+07	1.19197e+08	1.15852e+08
Jamaica	Caribbean	1.03215e+07	2.01671e+07	3.04887e+07	2.61596e+07
Kenya	Eastern Africa	2.14979e+07	1.05064e+08	1.26561e+08	2.17479e+08
Lesotho	Southern Africa	8.6246e+06	1.15747e+07	2.01993e+07	1.95187e+07
Malawi	Eastern Africa	7.80219e+06	1.89355e+07	2.67377e+07	6.31109e+07
Mali	Western Africa	1.08539e+06	1.26908e+07	1.37762e+07	5.81655e+07
Mozambique	Eastern Africa	4.64367e+07	9.76343e+07	1.44071e+08	2.69919e+08
Myanmar	South-Eastern Asia	5.20092e+06	4.73984e+07	5.25993e+07	7.56426e+07
Namibia	Southern Africa	4.24147e+06	8.82437e+06	1.30658e+07	1.15737e+07
Nigeria	Western Africa	2.41435e+08	1.94874e+08	4.36309e+08	7.03444e+08
Pakistan	Southern Asia	3.57781e+08	6.13483e+07	4.1913e+08	2.15025e+08
Russian Federation	Central Asia	5.18953e+08	3.80559e+08	8.99512e+08	4.86615e+08
South Africa	Southern Africa	1.21212e+08	2.70592e+08	3.91804e+08	3.43159e+08
South Sudan	Eastern Africa	2.56555e+06	1.93766e+07	2.19422e+07	6.22892e+07
Swaziland	Southern Africa	4.2074e+06	5.31299e+06	9.52039e+06	8.07298e+06
Uganda	Eastern Africa	2.12317e+07	5.04407e+07	7.16724e+07	2.1341e+08
Ukraine	Central Asia	1.25726e+08	1.27844e+08	2.5357e+08	2.03703e+08
United Republic of Tanzania	Eastern Africa	7.63926e+07	1.00895e+08	1.77288e+08	3.301e+08
United States of America	Northern America	6.46417e+08	7.37162e+08	1.38358e+09	1.07831e+09
Viet Nam	South-Eastern Asia	2.85248e+08	7.07132e+07	3.55962e+08	1.16634e+08
Zambia	Eastern Africa	1.64103e+07	2.85733e+07	4.49836e+07	8.51271e+07
Zimbabwe	Eastern Africa	1.16806e+07	2.50093e+07	3.66899e+07	6.62505e+07
Total		7.53534e+09	6.23217e+09	1.37675e+10	1.11899e+10
Total (billions)		7.53534	6.23217	13.7675	11.1899

[truncated: 8 more sheets: Cost Calculation Low, Cost Calculation Medium, Cost Calculation High, Cost by Subregion 15-30, DALYs Averted Summary, CEA Summary 15-30, CEA by Subregion15-30, CE Comparators]
